# Supplementary material for: Heteroaryl Chalcones: Design, Synthesis, X-ray Crystal Structures and Biological Evaluation
Source: Molecules. 2013 Oct 15;18(10):12707–24. doi: 10.3390/molecules181012707 (PMC6270154; doi:10.3390/molecules181012707)
Supplement: Supplementary file 1 [file molecules-18-12707-s001.txt]

 
data_3a
 
_audit_creation_method            SHELXL-97 
_chemical_name_systematic 
; 
 ? 
; 
_chemical_name_common             ? 
_chemical_melting_point           ? 
_chemical_formula_moiety          'C13 H8 Cl F O S'
_chemical_formula_sum 
 'C13 H8 Cl F O S' 
_chemical_formula_weight          266.70 
 
loop_ 
 _atom_type_symbol 
 _atom_type_description 
 _atom_type_scat_dispersion_real 
 _atom_type_scat_dispersion_imag 
 _atom_type_scat_source 
 'C'  'C'   0.0033   0.0016 
 'International Tables Vol C Tables 4.2.6.8 and 6.1.1.4' 
 'H'  'H'   0.0000   0.0000 
 'International Tables Vol C Tables 4.2.6.8 and 6.1.1.4' 
 'O'  'O'   0.0106   0.0060 
 'International Tables Vol C Tables 4.2.6.8 and 6.1.1.4' 
 'F'  'F'   0.0171   0.0103 
 'International Tables Vol C Tables 4.2.6.8 and 6.1.1.4' 
 'S'  'S'   0.1246   0.1234 
 'International Tables Vol C Tables 4.2.6.8 and 6.1.1.4' 
 'Cl'  'Cl'   0.1484   0.1585 
 'International Tables Vol C Tables 4.2.6.8 and 6.1.1.4' 
 
_symmetry_cell_setting               Orthorhombic
_symmetry_space_group_name_Hall      'P 2c -2ac'
_symmetry_space_group_name_H-M       'P c a 21' 
 
loop_ 
 _symmetry_equiv_pos_as_xyz 
 'x, y, z' 
 '-x, -y, z+1/2' 
 'x+1/2, -y, z' 
 '-x+1/2, y, z+1/2' 
 
_cell_length_a                    27.963(9) 
_cell_length_b                    3.9233(15) 
_cell_length_c                    11.146(4) 
_cell_angle_alpha                 90.00 
_cell_angle_beta                  90.00 
_cell_angle_gamma                 90.00 
_cell_volume                      1222.8(7) 
_cell_formula_units_Z             4 
_cell_measurement_temperature     297(2) 
_cell_measurement_reflns_used     1849
_cell_measurement_theta_min       2.34
_cell_measurement_theta_max       22.39
_exptl_crystal_description       'plate'
_exptl_crystal_colour            'colourless'
_exptl_crystal_size_max           0.93 
_exptl_crystal_size_mid           0.18 
_exptl_crystal_size_min           0.05 
_exptl_crystal_density_meas       ? 
_exptl_crystal_density_diffrn     1.449 
_exptl_crystal_density_method     'not measured' 
_exptl_crystal_F_000              544 
_exptl_absorpt_coefficient_mu     0.474 
_exptl_absorpt_correction_type    'multi-scan'
_exptl_absorpt_correction_T_min   0.6683 
_exptl_absorpt_correction_T_max   0.9749 
_exptl_absorpt_process_details    '(<i>SADABS</i>; Bruker, 2009)' 
 
_exptl_special_details 
; 
 ? 
; 
 
_diffrn_ambient_temperature       297(2) 
_diffrn_radiation_wavelength      0.71073 
_diffrn_radiation_type            MoK\a 
_diffrn_radiation_source          'fine-focus sealed tube' 
_diffrn_radiation_monochromator   graphite 
_diffrn_measurement_device_type   'Bruker APEX Duo CCD area detector'
_diffrn_measurement_method        '\f and \w scans'  
_diffrn_detector_area_resol_mean  ? 
_diffrn_standards_number          0 
_diffrn_standards_interval_count  . 
_diffrn_standards_interval_time   . 
_diffrn_standards_decay_%         ? 
_diffrn_reflns_number             8618 
_diffrn_reflns_av_R_equivalents   0.0562 
_diffrn_reflns_av_sigmaI/netI     0.0664 
_diffrn_reflns_limit_h_min        -37 
_diffrn_reflns_limit_h_max        39 
_diffrn_reflns_limit_k_min        -5 
_diffrn_reflns_limit_k_max        5 
_diffrn_reflns_limit_l_min        -15 
_diffrn_reflns_limit_l_max        15 
_diffrn_reflns_theta_min          2.34 
_diffrn_reflns_theta_max          29.94 
_reflns_number_total              3368 
_reflns_number_gt                 1899 
_reflns_threshold_expression      'I > 2\s(I)' 
 
_computing_data_collection        'APEX2 (Bruker, 2009)' 
_computing_cell_refinement        'SAINT (Bruker, 2009)' 
_computing_data_reduction          SAINT
_computing_structure_solution     'SHELXTL (Sheldrick, 2008)' 
_computing_structure_refinement    SHELXTL 
_computing_molecular_graphics      SHELXTL 
_computing_publication_material
;
SHELXTL and PLATON (Spek, 2009)
;
 
_refine_special_details 
; 
 Refinement of F^2^ against ALL reflections.  The weighted R-factor wR and 
 goodness of fit S are based on F^2^, conventional R-factors R are based 
 on F, with F set to zero for negative F^2^. The threshold expression of 
 F^2^ > 2sigma(F^2^) is used only for calculating R-factors(gt) etc. and is 
 not relevant to the choice of reflections for refinement.  R-factors based 
 on F^2^ are statistically about twice as large as those based on F, and R- 
 factors based on ALL data will be even larger. 
; 
 
_iucr_refine_instructions_details
;
TITL mo_ch1_0m in Pca2(1)  (RT)
CELL 0.71073  27.9628   3.9233  11.1457  90.000  90.000  90.000
ZERR    4.00   0.0090   0.0015   0.0038   0.000   0.000   0.000
LATT -1
SYMM -X, -Y, 0.5+Z
SYMM 0.5+X, -Y, Z
SYMM 0.5-X, Y, 0.5+Z
SFAC C H O F S Cl
UNIT 52 32 4 4 4 4
SIZE 0.183 0.925 0.054
L.S. 10
BOND $H
FMAP 2 2 60
PLAN 20
ACTA
CONF
WGHT      0.0599      0.0000 
FVAR       0.53292
CL1   6    0.672422   -0.244870   -0.031772    11.00000    0.05626    0.08892 =
         0.13125    0.00880    0.00610    0.00589
S1    5    0.586696    0.059427    0.083757    11.00000    0.06425    0.08017 =
         0.06208    0.00241   -0.00469    0.00100
F1    4    0.333581    0.739430    0.162199    11.00000    0.08359    0.24097 =
         0.09170   -0.04592    0.01100    0.02886
O1    3    0.498901    0.387385    0.167886    11.00000    0.08641    0.10672 =
         0.06040   -0.00978    0.01219    0.00871
C1    1    0.615258   -0.088075   -0.041256    11.00000    0.05549    0.05584 =
         0.08403    0.00811    0.00777   -0.00494
C2    1    0.588215   -0.065314   -0.141882    11.00000    0.07192    0.08437 =
         0.06646   -0.00319    0.01505    0.00920
AFIX  43
H2A   2    0.598318   -0.135186   -0.217478    11.00000   -1.20000
AFIX   0
C3    1    0.543397    0.075613   -0.118281    11.00000    0.06276    0.07784 =
         0.05533   -0.00500   -0.00072    0.00755
AFIX  43
H3A   2    0.520241    0.109815   -0.176953    11.00000   -1.20000
AFIX   0
C4    1    0.536912    0.158540   -0.000085    11.00000    0.05783    0.04860 =
         0.05579    0.00155    0.00418   -0.00143
C5    1    0.496290    0.313723    0.060718    11.00000    0.06229    0.05673 =
         0.05649    0.00319    0.01046   -0.00251
C6    1    0.452635    0.382453   -0.011009    11.00000    0.05915    0.06819 =
         0.06336    0.00229    0.00811    0.00461
AFIX  43
H6A   2    0.452778    0.333237   -0.092630    11.00000   -1.20000
AFIX   0
C7    1    0.413730    0.511045    0.037580    11.00000    0.06164    0.06499 =
         0.07074    0.00864    0.00987    0.00048
AFIX  43
H7A   2    0.415402    0.560479    0.119078    11.00000   -1.20000
AFIX   0
C8    1    0.368107    0.585609   -0.021381    11.00000    0.05956    0.05743 =
         0.07624    0.00182    0.01199    0.00082
C9    1    0.360715    0.542803   -0.144411    11.00000    0.07013    0.09825 =
         0.07849   -0.00065    0.01060    0.01368
AFIX  43
H9A   2    0.385736    0.464376   -0.191949    11.00000   -1.20000
AFIX   0
C10   1    0.317615    0.613351   -0.196641    11.00000    0.09101    0.12300 =
         0.07924    0.00464   -0.00163    0.02488
AFIX  43
H10A  2    0.313963    0.589248   -0.279142    11.00000   -1.20000
AFIX   0
C11   1    0.279469    0.720204   -0.127578    11.00000    0.07025    0.09232 =
         0.11010    0.01038   -0.00470    0.00988
AFIX  43
H11A  2    0.249930    0.759921   -0.163282    11.00000   -1.20000
AFIX   0
C12   1    0.284967    0.767622   -0.007324    11.00000    0.06048    0.11212 =
         0.09964   -0.00795    0.01741    0.00224
AFIX  43
H12A  2    0.259904    0.846719    0.039932    11.00000   -1.20000
AFIX   0
C13   1    0.328853    0.694444    0.041666    11.00000    0.06163    0.10293 =
         0.07870   -0.00413    0.01231    0.00291
 
HKLF 4 1 0 0 1 0 -1 0 1 0 0
 
REM  mo_ch1_0m in Pca2(1)  (RT)
REM R1 =  0.0490 for   1899 Fo > 4sig(Fo)  and  0.0974 for all   3368 data
REM    154 parameters refined using      1 restraints
 
END  
     
WGHT      0.0599      0.0000 
REM Highest difference peak  0.197,  deepest hole -0.228,  1-sigma level  0.052
Q1    1   0.6346 -0.0406 -0.0382  11.00000  0.05    0.20
Q2    1   0.6665 -0.0493  0.0238  11.00000  0.05    0.19
Q3    1   0.5648  0.2432  0.0347  11.00000  0.05    0.19
Q4    1   0.6054 -0.2237 -0.0576  11.00000  0.05    0.18
Q5    1   0.3230  0.4610  0.1238  11.00000  0.05    0.18
Q6    1   0.5804 -0.2781  0.0358  11.00000  0.05    0.16
Q7    1   0.6185  0.2953  0.0018  11.00000  0.05    0.16
Q8    1   0.7330 -0.2486 -0.0366  11.00000  0.05    0.16
Q9    1   0.5215  0.5972  0.1078  11.00000  0.05    0.16
Q10   1   0.5995 -0.1751  0.0153  11.00000  0.05    0.16
Q11   1   0.6930 -0.0824  0.0292  11.00000  0.05    0.16
Q12   1   0.6332 -0.5053 -0.0235  11.00000  0.05    0.15
Q13   1   0.5254  0.0509  0.1046  11.00000  0.05    0.15
Q14   1   0.3787  0.4080  0.0211  11.00000  0.05    0.15
Q15   1   0.3364  0.5178  0.1080  11.00000  0.05    0.15
Q16   1   0.4175  0.2428  0.1185  11.00000  0.05    0.14
Q17   1   0.7071 -0.0145 -0.0443  11.00000  0.05    0.14
Q18   1   0.4557  0.7839  0.0158  11.00000  0.05    0.14
Q19   1   0.5234  0.2721  0.0350  11.00000  0.05    0.14
Q20   1   0.5403  0.2464 -0.0453  11.00000  0.05    0.14
;

_refine_ls_structure_factor_coef  Fsqd  
_refine_ls_matrix_type            full 
_refine_ls_weighting_scheme       calc  
_refine_ls_weighting_details 
 'calc w=1/[\s^2^(Fo^2^)+(0.0599P)^2^+0.0000P] where P=(Fo^2^+2Fc^2^)/3' 
_atom_sites_solution_primary      direct 
_atom_sites_solution_secondary    difmap 
_atom_sites_solution_hydrogens    geom 
_refine_ls_hydrogen_treatment     mixed 
_refine_ls_extinction_method      none 
_refine_ls_extinction_coef        ? 
_refine_ls_abs_structure_details 
 'Flack H D (1983), Acta Cryst. A39, 876-881' 
_refine_ls_abs_structure_Flack    0.02(10) 
_refine_ls_number_reflns          3368 
_refine_ls_number_parameters      154 
_refine_ls_number_restraints      1 
_refine_ls_R_factor_all           0.0974 
_refine_ls_R_factor_gt            0.0490 
_refine_ls_wR_factor_ref          0.1363 
_refine_ls_wR_factor_gt           0.1143 
_refine_ls_goodness_of_fit_ref    0.990 
_refine_ls_restrained_S_all       0.989 
_refine_ls_shift/su_max           0.000 
_refine_ls_shift/su_mean          0.000 
 
loop_ 
 _atom_site_label 
 _atom_site_type_symbol 
 _atom_site_fract_x 
 _atom_site_fract_y 
 _atom_site_fract_z 
 _atom_site_U_iso_or_equiv 
 _atom_site_adp_type 
 _atom_site_occupancy 
 _atom_site_symmetry_multiplicity 
 _atom_site_calc_flag 
 _atom_site_refinement_flags 
 _atom_site_disorder_assembly 
 _atom_site_disorder_group 
Cl1 Cl 0.67242(3) -0.2449(3) -0.03177(14) 0.0921(4) Uani 1 1 d . . . 
S1 S 0.58670(3) 0.0594(2) 0.08376(7) 0.0688(3) Uani 1 1 d . . . 
F1 F 0.33358(10) 0.7394(12) 0.1622(3) 0.1388(15) Uani 1 1 d . . . 
O1 O 0.49890(9) 0.3874(8) 0.1679(2) 0.0845(8) Uani 1 1 d . . . 
C1 C 0.61526(11) -0.0881(8) -0.0413(3) 0.0651(8) Uani 1 1 d . . . 
C2 C 0.58821(13) -0.0653(10) -0.1419(3) 0.0743(10) Uani 1 1 d . . . 
H2A H 0.5983 -0.1352 -0.2175 0.089 Uiso 1 1 calc R . . 
C3 C 0.54340(12) 0.0756(10) -0.1183(3) 0.0653(8) Uani 1 1 d . . . 
H3A H 0.5202 0.1098 -0.1770 0.078 Uiso 1 1 calc R . . 
C4 C 0.53691(11) 0.1585(8) -0.0001(3) 0.0541(7) Uani 1 1 d . . . 
C5 C 0.49629(11) 0.3137(9) 0.0607(3) 0.0585(8) Uani 1 1 d . . . 
C6 C 0.45264(11) 0.3825(9) -0.0110(3) 0.0636(8) Uani 1 1 d . . . 
H6A H 0.4528 0.3332 -0.0926 0.076 Uiso 1 1 calc R . . 
C7 C 0.41373(11) 0.5110(9) 0.0376(3) 0.0658(9) Uani 1 1 d . . . 
H7A H 0.4154 0.5605 0.1191 0.079 Uiso 1 1 calc R . . 
C8 C 0.36811(11) 0.5856(9) -0.0214(3) 0.0644(8) Uani 1 1 d . . . 
C9 C 0.36072(14) 0.5428(12) -0.1444(4) 0.0823(11) Uani 1 1 d . . . 
H9A H 0.3857 0.4644 -0.1919 0.099 Uiso 1 1 calc R . . 
C10 C 0.31761(17) 0.6134(15) -0.1966(4) 0.0978(14) Uani 1 1 d . . . 
H10A H 0.3140 0.5892 -0.2791 0.117 Uiso 1 1 calc R . . 
C11 C 0.27947(14) 0.7202(12) -0.1276(4) 0.0909(13) Uani 1 1 d . . . 
H11A H 0.2499 0.7599 -0.1633 0.109 Uiso 1 1 calc R . . 
C12 C 0.28497(13) 0.7676(12) -0.0073(4) 0.0907(12) Uani 1 1 d . . . 
H12A H 0.2599 0.8467 0.0399 0.109 Uiso 1 1 calc R . . 
C13 C 0.32885(13) 0.6944(13) 0.0417(4) 0.0811(12) Uani 1 1 d . . . 
 
loop_ 
 _atom_site_aniso_label 
 _atom_site_aniso_U_11 
 _atom_site_aniso_U_22 
 _atom_site_aniso_U_33 
 _atom_site_aniso_U_23 
 _atom_site_aniso_U_13 
 _atom_site_aniso_U_12 
Cl1 0.0563(4) 0.0889(7) 0.1313(9) 0.0088(7) 0.0061(6) 0.0059(5) 
S1 0.0643(5) 0.0802(6) 0.0621(4) 0.0024(6) -0.0047(4) 0.0010(4) 
F1 0.0836(17) 0.241(4) 0.0917(18) -0.046(2) 0.0110(13) 0.029(2) 
O1 0.0864(17) 0.107(2) 0.0604(13) -0.0098(16) 0.0122(12) 0.0087(15) 
C1 0.0555(15) 0.0558(19) 0.084(2) 0.008(2) 0.0078(17) -0.0049(14) 
C2 0.072(2) 0.084(3) 0.0665(17) -0.0032(19) 0.0151(17) 0.0092(19) 
C3 0.0628(18) 0.078(2) 0.0553(16) -0.0050(17) -0.0007(13) 0.0075(17) 
C4 0.0578(15) 0.0486(17) 0.0558(15) 0.0015(14) 0.0042(13) -0.0014(14) 
C5 0.0623(18) 0.0567(19) 0.0565(17) 0.0032(15) 0.0105(13) -0.0025(14) 
C6 0.0592(16) 0.068(2) 0.0634(16) 0.0023(17) 0.0081(15) 0.0046(15) 
C7 0.0616(19) 0.065(2) 0.0707(18) 0.0086(16) 0.0099(15) 0.0005(16) 
C8 0.0596(15) 0.057(2) 0.076(2) 0.002(2) 0.0120(17) 0.0008(14) 
C9 0.070(2) 0.098(3) 0.078(2) -0.001(2) 0.0106(19) 0.014(2) 
C10 0.091(3) 0.123(4) 0.079(2) 0.005(3) -0.002(2) 0.025(3) 
C11 0.070(2) 0.092(3) 0.110(3) 0.010(3) -0.005(2) 0.010(2) 
C12 0.0605(19) 0.112(3) 0.100(3) -0.008(3) 0.017(2) 0.002(2) 
C13 0.062(2) 0.103(3) 0.079(2) -0.004(2) 0.0123(16) 0.003(2) 
 
_geom_special_details 
; 
 All esds (except the esd in the dihedral angle between two l.s. planes) 
 are estimated using the full covariance matrix.  The cell esds are taken 
 into account individually in the estimation of esds in distances, angles 
 and torsion angles; correlations between esds in cell parameters are only 
 used when they are defined by crystal symmetry.  An approximate (isotropic) 
 treatment of cell esds is used for estimating esds involving l.s. planes. 
; 
 
loop_ 
 _geom_bond_atom_site_label_1 
 _geom_bond_atom_site_label_2 
 _geom_bond_distance 
 _geom_bond_site_symmetry_2 
 _geom_bond_publ_flag 
Cl1 C1 1.716(3) . ? 
S1 C1 1.707(4) . ? 
S1 C4 1.721(3) . ? 
F1 C13 1.361(5) . ? 
O1 C5 1.231(4) . ? 
C1 C2 1.356(5) . ? 
C2 C3 1.395(5) . ? 
C2 H2A 0.9300 . ? 
C3 C4 1.369(4) . ? 
C3 H3A 0.9300 . ? 
C4 C5 1.456(4) . ? 
C5 C6 1.484(5) . ? 
C6 C7 1.316(4) . ? 
C6 H6A 0.9300 . ? 
C7 C8 1.465(5) . ? 
C7 H7A 0.9300 . ? 
C8 C13 1.371(5) . ? 
C8 C9 1.397(5) . ? 
C9 C10 1.367(6) . ? 
C9 H9A 0.9300 . ? 
C10 C11 1.381(6) . ? 
C10 H10A 0.9300 . ? 
C11 C12 1.362(6) . ? 
C11 H11A 0.9300 . ? 
C12 C13 1.374(5) . ? 
C12 H12A 0.9300 . ? 
 
loop_ 
 _geom_angle_atom_site_label_1 
 _geom_angle_atom_site_label_2 
 _geom_angle_atom_site_label_3 
 _geom_angle 
 _geom_angle_site_symmetry_1 
 _geom_angle_site_symmetry_3 
 _geom_angle_publ_flag 
C1 S1 C4 90.68(16) . . ? 
C2 C1 S1 113.1(2) . . ? 
C2 C1 Cl1 126.5(3) . . ? 
S1 C1 Cl1 120.5(2) . . ? 
C1 C2 C3 111.8(3) . . ? 
C1 C2 H2A 124.1 . . ? 
C3 C2 H2A 124.1 . . ? 
C4 C3 C2 113.2(3) . . ? 
C4 C3 H3A 123.4 . . ? 
C2 C3 H3A 123.4 . . ? 
C3 C4 C5 130.6(3) . . ? 
C3 C4 S1 111.2(2) . . ? 
C5 C4 S1 118.2(2) . . ? 
O1 C5 C4 120.2(3) . . ? 
O1 C5 C6 121.9(3) . . ? 
C4 C5 C6 117.8(3) . . ? 
C7 C6 C5 121.9(3) . . ? 
C7 C6 H6A 119.1 . . ? 
C5 C6 H6A 119.1 . . ? 
C6 C7 C8 127.7(4) . . ? 
C6 C7 H7A 116.1 . . ? 
C8 C7 H7A 116.1 . . ? 
C13 C8 C9 115.0(3) . . ? 
C13 C8 C7 122.0(4) . . ? 
C9 C8 C7 123.0(3) . . ? 
C10 C9 C8 121.6(4) . . ? 
C10 C9 H9A 119.2 . . ? 
C8 C9 H9A 119.2 . . ? 
C9 C10 C11 120.4(4) . . ? 
C9 C10 H10A 119.8 . . ? 
C11 C10 H10A 119.8 . . ? 
C12 C11 C10 120.2(4) . . ? 
C12 C11 H11A 119.9 . . ? 
C10 C11 H11A 119.9 . . ? 
C11 C12 C13 117.6(4) . . ? 
C11 C12 H12A 121.2 . . ? 
C13 C12 H12A 121.2 . . ? 
F1 C13 C8 117.9(4) . . ? 
F1 C13 C12 116.9(4) . . ? 
C8 C13 C12 125.2(4) . . ? 
 
loop_ 
 _geom_torsion_atom_site_label_1 
 _geom_torsion_atom_site_label_2 
 _geom_torsion_atom_site_label_3 
 _geom_torsion_atom_site_label_4 
 _geom_torsion 
 _geom_torsion_site_symmetry_1 
 _geom_torsion_site_symmetry_2 
 _geom_torsion_site_symmetry_3 
 _geom_torsion_site_symmetry_4 
 _geom_torsion_publ_flag 
C4 S1 C1 C2 -0.4(3) . . . . ? 
C4 S1 C1 Cl1 179.7(2) . . . . ? 
S1 C1 C2 C3 0.3(4) . . . . ? 
Cl1 C1 C2 C3 -179.8(3) . . . . ? 
C1 C2 C3 C4 0.1(5) . . . . ? 
C2 C3 C4 C5 178.9(3) . . . . ? 
C2 C3 C4 S1 -0.3(4) . . . . ? 
C1 S1 C4 C3 0.4(3) . . . . ? 
C1 S1 C4 C5 -178.9(3) . . . . ? 
C3 C4 C5 O1 -175.4(4) . . . . ? 
S1 C4 C5 O1 3.8(4) . . . . ? 
C3 C4 C5 C6 3.8(5) . . . . ? 
S1 C4 C5 C6 -177.0(2) . . . . ? 
O1 C5 C6 C7 -3.2(5) . . . . ? 
C4 C5 C6 C7 177.6(3) . . . . ? 
C5 C6 C7 C8 -178.8(3) . . . . ? 
C6 C7 C8 C13 174.6(4) . . . . ? 
C6 C7 C8 C9 -3.5(6) . . . . ? 
C13 C8 C9 C10 1.5(7) . . . . ? 
C7 C8 C9 C10 179.7(4) . . . . ? 
C8 C9 C10 C11 -2.0(8) . . . . ? 
C9 C10 C11 C12 2.3(8) . . . . ? 
C10 C11 C12 C13 -2.1(7) . . . . ? 
C9 C8 C13 F1 179.6(5) . . . . ? 
C7 C8 C13 F1 1.4(7) . . . . ? 
C9 C8 C13 C12 -1.4(7) . . . . ? 
C7 C8 C13 C12 -179.7(4) . . . . ? 
C11 C12 C13 F1 -179.3(5) . . . . ? 
C11 C12 C13 C8 1.8(7) . . . . ? 
 
_diffrn_measured_fraction_theta_max    0.996 
_diffrn_reflns_theta_full              29.94 
_diffrn_measured_fraction_theta_full   0.996 
_refine_diff_density_max    0.197 
_refine_diff_density_min   -0.228 
_refine_diff_density_rms    0.052 
#=====================================================================
 
data_3b
 
_audit_creation_method            SHELXL-97 
_chemical_name_systematic 
; 
 ? 
; 
_chemical_name_common             ? 
_chemical_melting_point           ? 
_chemical_formula_moiety          'C13 H8 Cl F O S'
_chemical_formula_sum 
 'C13 H8 Cl F O S' 
_chemical_formula_weight          266.70 
 
loop_ 
 _atom_type_symbol 
 _atom_type_description 
 _atom_type_scat_dispersion_real 
 _atom_type_scat_dispersion_imag 
 _atom_type_scat_source 
 'C'  'C'   0.0033   0.0016 
 'International Tables Vol C Tables 4.2.6.8 and 6.1.1.4' 
 'H'  'H'   0.0000   0.0000 
 'International Tables Vol C Tables 4.2.6.8 and 6.1.1.4' 
 'O'  'O'   0.0106   0.0060 
 'International Tables Vol C Tables 4.2.6.8 and 6.1.1.4' 
 'F'  'F'   0.0171   0.0103 
 'International Tables Vol C Tables 4.2.6.8 and 6.1.1.4' 
 'S'  'S'   0.1246   0.1234 
 'International Tables Vol C Tables 4.2.6.8 and 6.1.1.4' 
 'Cl'  'Cl'   0.1484   0.1585 
 'International Tables Vol C Tables 4.2.6.8 and 6.1.1.4' 
 
_symmetry_cell_setting                 Monoclinic
_symmetry_space_group_name_Hall      '-P 2ybc'
_symmetry_space_group_name_H-M       'P 21/c'
 
loop_ 
 _symmetry_equiv_pos_as_xyz 
 'x, y, z' 
 '-x, y+1/2, -z+1/2' 
 '-x, -y, -z' 
 'x, -y-1/2, z-1/2' 
 
_cell_length_a                    14.282(6) 
_cell_length_b                    7.698(4) 
_cell_length_c                    11.376(5) 
_cell_angle_alpha                 90.00 
_cell_angle_beta                  104.430(8) 
_cell_angle_gamma                 90.00 
_cell_volume                      1211.3(9) 
_cell_formula_units_Z             4 
_cell_measurement_temperature     297(2)
_cell_measurement_reflns_used     773
_cell_measurement_theta_min       3.03
_cell_measurement_theta_max       19.51
_exptl_crystal_description       'plate'
_exptl_crystal_colour            'colourless' 
_exptl_crystal_size_max           0.25 
_exptl_crystal_size_mid           0.25 
_exptl_crystal_size_min           0.05 
_exptl_crystal_density_meas       ? 
_exptl_crystal_density_diffrn     1.462 
_exptl_crystal_density_method     'not measured' 
_exptl_crystal_F_000              544 
_exptl_absorpt_coefficient_mu     0.478 
_exptl_absorpt_correction_type    'multi-scan'
_exptl_absorpt_correction_T_min   0.8890 
_exptl_absorpt_correction_T_max   0.9751 
_exptl_absorpt_process_details    '(<i>SADABS</i>; Bruker, 2009)'
 
_exptl_special_details 
; 
 ? 
; 
 
_diffrn_ambient_temperature       297(2) 
_diffrn_radiation_wavelength      0.71073 
_diffrn_radiation_type            MoK\a 
_diffrn_radiation_source          'fine-focus sealed tube' 
_diffrn_radiation_monochromator   graphite 
_diffrn_measurement_device_type   'Bruker APEX Duo CCD area detector'
_diffrn_measurement_method        '\f and \w scans'  
_diffrn_detector_area_resol_mean  ? 
_diffrn_standards_number          0 
_diffrn_standards_interval_count  . 
_diffrn_standards_interval_time   . 
_diffrn_standards_decay_%         ?
_diffrn_reflns_number             9071 
_diffrn_reflns_av_R_equivalents   0.0944 
_diffrn_reflns_av_sigmaI/netI     0.0772 
_diffrn_reflns_limit_h_min        -16 
_diffrn_reflns_limit_h_max        16 
_diffrn_reflns_limit_k_min        -9 
_diffrn_reflns_limit_k_max        9 
_diffrn_reflns_limit_l_min        -13 
_diffrn_reflns_limit_l_max        13 
_diffrn_reflns_theta_min          2.95 
_diffrn_reflns_theta_max          25.00 
_reflns_number_total              2126 
_reflns_number_gt                 1133 
_reflns_threshold_expression      'I > 2\s(I)' 
 
_computing_data_collection        'APEX2 (Bruker, 2009)' 
_computing_cell_refinement        'SAINT (Bruker, 2009)' 
_computing_data_reduction          SAINT
_computing_structure_solution     'SHELXTL (Sheldrick, 2008)' 
_computing_structure_refinement    SHELXTL 
_computing_molecular_graphics      SHELXTL 
_computing_publication_material
;
SHELXTL and PLATON (Spek, 2009)
;
 
_refine_special_details 
; 
 Refinement of F^2^ against ALL reflections.  The weighted R-factor wR and 
 goodness of fit S are based on F^2^, conventional R-factors R are based 
 on F, with F set to zero for negative F^2^. The threshold expression of 
 F^2^ > 2sigma(F^2^) is used only for calculating R-factors(gt) etc. and is 
 not relevant to the choice of reflections for refinement.  R-factors based 
 on F^2^ are statistically about twice as large as those based on F, and R- 
 factors based on ALL data will be even larger. 
; 

_iucr_refine_instructions_details
;
TITL mo_ch2_0m in P2(1)/c (RT)
CELL 0.71073  14.2822   7.6982  11.3760  90.000 104.430  90.000
ZERR    4.00   0.0061   0.0035   0.0049   0.000   0.008   0.000
LATT  1
SYMM -X, 0.5+Y, 0.5-Z
SFAC C H O F S CL
UNIT 52 32 4 4 4 4
TEMP 24.000
SIZE 0.053 0.245 0.252
L.S. 10
BOND $H
FMAP 2 2 60
PLAN 20
OMIT -4 50
OMIT 1 0 4
ACTA
CONF
WGHT      0.0994      0.0000 
FVAR       0.60935
CL1   6    0.207031    0.533351    0.811823    11.00000    0.05414    0.08555 =
         0.07650   -0.00139    0.00270   -0.00584
S1    5    0.405240    0.627134    0.796919    11.00000    0.06383    0.08396 =
         0.04158   -0.00176    0.00768   -0.00861
F1    4    0.878723    1.028468    1.427407    11.00000    0.12766    0.20839 =
         0.09446   -0.03802    0.00479   -0.02212
O1    3    0.607078    0.719661    0.811819    11.00000    0.07063    0.09910 =
         0.05085   -0.00444    0.02105   -0.00861
C1    1    0.321132    0.611615    0.879250    11.00000    0.04987    0.05850 =
         0.05684    0.00629    0.00669    0.00584
C2    1    0.353970    0.664995    0.996653    11.00000    0.06120    0.08179 =
         0.05412   -0.00657    0.01832   -0.00158
AFIX  43
H2A   2    0.317390    0.664276    1.053800    11.00000   -1.20000
AFIX   0
C3    1    0.449745    0.720811    1.019569    11.00000    0.06186    0.06843 =
         0.04803   -0.00656    0.00929   -0.00011
AFIX  43
H3A   2    0.484568    0.760565    1.095015    11.00000   -1.20000
AFIX   0
C4    1    0.487640    0.711459    0.920218    11.00000    0.05487    0.04618 =
         0.04362    0.00118    0.00932    0.00230
C5    1    0.585573    0.749396    0.908064    11.00000    0.05510    0.05982 =
         0.04605    0.00454    0.00788    0.00212
C6    1    0.654499    0.824733    1.013688    11.00000    0.05587    0.05708 =
         0.05046    0.00348    0.01321   -0.00014
AFIX  43
H6A   2    0.637466    0.830905    1.087333    11.00000   -1.20000
AFIX   0
C7    1    0.739744    0.883855    1.007294    11.00000    0.06095    0.06931 =
         0.05898    0.00724    0.01767    0.00340
AFIX  43
H7A   2    0.753768    0.876173    0.931898    11.00000   -1.20000
AFIX   0
C8    1    0.815067    0.960449    1.105647    11.00000    0.05487    0.05056 =
         0.06876    0.00421    0.00828    0.00513
C9    1    0.810287    0.958067    1.226138    11.00000    0.05550    0.06791 =
         0.07467   -0.00254    0.00831   -0.00155
AFIX  43
H9A   2    0.758399    0.906042    1.248162    11.00000   -1.20000
AFIX   0
C10   1    0.883437    1.033782    1.311778    11.00000    0.07428    0.09547 =
         0.05777   -0.01626    0.00262    0.00469
C11   1    0.962039    1.113728    1.285400    11.00000    0.05439    0.07419 =
         0.12432   -0.02639   -0.00207    0.00368
AFIX  43
H11A  2    1.009933    1.164904    1.346133    11.00000   -1.20000
AFIX   0
C12   1    0.967460    1.115468    1.165904    11.00000    0.05971    0.08381 =
         0.12091   -0.00553    0.01718    0.00519
AFIX  43
H12A  2    1.019858    1.166552    1.144490    11.00000   -1.20000
AFIX   0
C13   1    0.894470    1.040798    1.079501    11.00000    0.05855    0.07711 =
         0.08393   -0.00220    0.01713   -0.00461
AFIX  43
H13A  2    0.898283    1.044073    0.999104    11.00000   -1.20000
 
HKLF 4 1 0 0 1 0 -1 0 1 0 0
 
REM  mo_ch2_0m in P2(1)/c (RT)
REM R1 =  0.0589 for   1133 Fo > 4sig(Fo)  and  0.1239 for all   2126 data
REM    154 parameters refined using      0 restraints
 
END  
     
WGHT      0.0994      0.0000 
REM Highest difference peak  0.763,  deepest hole -0.299,  1-sigma level  0.063
Q1    1   0.2812  0.5811  0.8608  11.00000  0.05    0.22
Q2    1   0.5348  0.7211  0.9171  11.00000  0.05    0.22
Q3    1   0.6775  0.7252  0.8575  11.00000  0.05    0.21
Q4    1   0.3599  0.6030  0.8254  11.00000  0.05    0.20
Q5    1   0.8024  1.0224  1.0945  11.00000  0.05    0.19
Q6    1   0.3231  0.6666  0.9447  11.00000  0.05    0.18
Q7    1   0.4649  0.6231  0.8989  11.00000  0.05    0.18
Q8    1   0.1232  0.5614  0.8032  11.00000  0.05    0.17
Q9    1   0.9631  1.0408  1.3219  11.00000  0.05    0.17
Q10   1   0.8613  1.0519  1.0248  11.00000  0.05    0.17
Q11   1   0.4681  0.6678  0.8632  11.00000  0.05    0.17
Q12   1   0.9854  1.2341  1.3672  11.00000  0.05    0.17
Q13   1   0.9651  1.1116  1.1928  11.00000  0.05    0.16
Q14   1   0.3567  0.8849  0.8182  11.00000  0.05    0.16
Q15   1   0.6225  0.7656  0.9536  11.00000  0.05    0.16
Q16   1   0.7578  0.9370  1.3819  11.00000  0.05    0.16
Q17   1   0.1579  0.3562  0.8459  11.00000  0.05    0.16
Q18   1   0.4865  0.6392  0.8166  11.00000  0.05    0.16
Q19   1   0.5715  0.8225  0.9225  11.00000  0.05    0.15
Q20   1   0.2675  0.6522  0.7636  11.00000  0.05    0.15
;
 
_refine_ls_structure_factor_coef  Fsqd  
_refine_ls_matrix_type            full 
_refine_ls_weighting_scheme       calc  
_refine_ls_weighting_details 
 'calc w=1/[\s^2^(Fo^2^)+(0.0994P)^2^+0.0000P] where P=(Fo^2^+2Fc^2^)/3' 
_atom_sites_solution_primary      direct 
_atom_sites_solution_secondary    difmap 
_atom_sites_solution_hydrogens    geom 
_refine_ls_hydrogen_treatment     constr
_refine_ls_extinction_method      none 
_refine_ls_extinction_coef        ? 
_refine_ls_number_reflns          2126 
_refine_ls_number_parameters      154 
_refine_ls_number_restraints      0 
_refine_ls_R_factor_all           0.1239 
_refine_ls_R_factor_gt            0.0589 
_refine_ls_wR_factor_ref          0.1912 
_refine_ls_wR_factor_gt           0.1530 
_refine_ls_goodness_of_fit_ref    1.001 
_refine_ls_restrained_S_all       1.001 
_refine_ls_shift/su_max           0.000 
_refine_ls_shift/su_mean          0.000 
 
loop_ 
 _atom_site_label 
 _atom_site_type_symbol 
 _atom_site_fract_x 
 _atom_site_fract_y 
 _atom_site_fract_z 
 _atom_site_U_iso_or_equiv 
 _atom_site_adp_type 
 _atom_site_occupancy 
 _atom_site_symmetry_multiplicity 
 _atom_site_calc_flag 
 _atom_site_refinement_flags 
 _atom_site_disorder_assembly 
 _atom_site_disorder_group 
Cl1 Cl 0.20703(9) 0.5334(2) 0.81182(12) 0.0745(5) Uani 1 1 d . . . 
S1 S 0.40524(9) 0.6271(2) 0.79692(10) 0.0641(5) Uani 1 1 d . . . 
F1 F 0.8787(3) 1.0285(8) 1.4274(4) 0.1476(18) Uani 1 1 d . . . 
O1 O 0.6071(2) 0.7197(5) 0.8118(3) 0.0725(11) Uani 1 1 d . . . 
C1 C 0.3211(3) 0.6116(7) 0.8792(4) 0.0562(13) Uani 1 1 d . . . 
C2 C 0.3540(3) 0.6650(8) 0.9967(4) 0.0650(15) Uani 1 1 d . . . 
H2A H 0.3174 0.6643 1.0538 0.078 Uiso 1 1 calc R . . 
C3 C 0.4497(3) 0.7208(7) 1.0196(4) 0.0602(13) Uani 1 1 d . . . 
H3A H 0.4846 0.7606 1.0950 0.072 Uiso 1 1 calc R . . 
C4 C 0.4876(3) 0.7115(6) 0.9202(4) 0.0487(12) Uani 1 1 d . . . 
C5 C 0.5856(3) 0.7494(7) 0.9081(4) 0.0545(13) Uani 1 1 d . . . 
C6 C 0.6545(3) 0.8247(6) 1.0137(4) 0.0545(13) Uani 1 1 d . . . 
H6A H 0.6375 0.8309 1.0873 0.065 Uiso 1 1 calc R . . 
C7 C 0.7397(3) 0.8839(7) 1.0073(4) 0.0626(14) Uani 1 1 d . . . 
H7A H 0.7538 0.8762 0.9319 0.075 Uiso 1 1 calc R . . 
C8 C 0.8151(3) 0.9604(7) 1.1056(5) 0.0593(13) Uani 1 1 d . . . 
C9 C 0.8103(3) 0.9581(8) 1.2261(5) 0.0674(15) Uani 1 1 d . . . 
H9A H 0.7584 0.9060 1.2482 0.081 Uiso 1 1 calc R . . 
C10 C 0.8834(4) 1.0338(9) 1.3118(5) 0.0783(17) Uani 1 1 d . . . 
C11 C 0.9620(4) 1.1137(8) 1.2854(7) 0.089(2) Uani 1 1 d . . . 
H11A H 1.0099 1.1649 1.3461 0.106 Uiso 1 1 calc R . . 
C12 C 0.9675(4) 1.1155(9) 1.1659(7) 0.0891(19) Uani 1 1 d . . . 
H12A H 1.0199 1.1666 1.1445 0.107 Uiso 1 1 calc R . . 
C13 C 0.8945(4) 1.0408(8) 1.0795(6) 0.0733(16) Uani 1 1 d . . . 
H13A H 0.8983 1.0441 0.9991 0.088 Uiso 1 1 calc R . . 
 
loop_ 
 _atom_site_aniso_label 
 _atom_site_aniso_U_11 
 _atom_site_aniso_U_22 
 _atom_site_aniso_U_33 
 _atom_site_aniso_U_23 
 _atom_site_aniso_U_13 
 _atom_site_aniso_U_12 
Cl1 0.0541(7) 0.0856(12) 0.0765(9) -0.0014(8) 0.0027(6) -0.0058(7) 
S1 0.0638(8) 0.0840(11) 0.0416(7) -0.0018(7) 0.0077(5) -0.0086(7) 
F1 0.128(3) 0.208(5) 0.094(3) -0.038(3) 0.005(2) -0.022(3) 
O1 0.071(2) 0.099(3) 0.051(2) -0.004(2) 0.0210(17) -0.009(2) 
C1 0.050(3) 0.059(3) 0.057(3) 0.006(3) 0.007(2) 0.006(2) 
C2 0.061(3) 0.082(4) 0.054(3) -0.007(3) 0.018(2) -0.002(3) 
C3 0.062(3) 0.068(4) 0.048(3) -0.007(3) 0.009(2) 0.000(3) 
C4 0.055(3) 0.046(3) 0.044(2) 0.001(2) 0.009(2) 0.002(2) 
C5 0.055(3) 0.060(4) 0.046(2) 0.005(3) 0.008(2) 0.002(3) 
C6 0.056(3) 0.057(4) 0.050(3) 0.003(2) 0.013(2) 0.000(2) 
C7 0.061(3) 0.069(4) 0.059(3) 0.007(3) 0.018(2) 0.003(3) 
C8 0.055(3) 0.051(3) 0.069(3) 0.004(3) 0.008(2) 0.005(3) 
C9 0.055(3) 0.068(4) 0.075(3) -0.003(3) 0.008(3) -0.002(3) 
C10 0.074(4) 0.095(5) 0.058(3) -0.016(3) 0.003(3) 0.005(3) 
C11 0.054(3) 0.074(4) 0.124(6) -0.026(4) -0.002(3) 0.004(3) 
C12 0.060(4) 0.084(5) 0.121(6) -0.006(4) 0.017(4) 0.005(3) 
C13 0.059(3) 0.077(4) 0.084(4) -0.002(3) 0.017(3) -0.005(3) 
 
_geom_special_details 
; 
 All esds (except the esd in the dihedral angle between two l.s. planes) 
 are estimated using the full covariance matrix.  The cell esds are taken 
 into account individually in the estimation of esds in distances, angles 
 and torsion angles; correlations between esds in cell parameters are only 
 used when they are defined by crystal symmetry.  An approximate (isotropic) 
 treatment of cell esds is used for estimating esds involving l.s. planes. 
; 
 
loop_ 
 _geom_bond_atom_site_label_1 
 _geom_bond_atom_site_label_2 
 _geom_bond_distance 
 _geom_bond_site_symmetry_2 
 _geom_bond_publ_flag 
Cl1 C1 1.727(5) . ? 
S1 C1 1.702(5) . ? 
S1 C4 1.718(4) . ? 
F1 C10 1.334(7) . ? 
O1 C5 1.230(5) . ? 
C1 C2 1.364(6) . ? 
C2 C3 1.395(6) . ? 
C2 H2A 0.9300 . ? 
C3 C4 1.371(6) . ? 
C3 H3A 0.9300 . ? 
C4 C5 1.469(6) . ? 
C5 C6 1.470(6) . ? 
C6 C7 1.319(6) . ? 
C6 H6A 0.9300 . ? 
C7 C8 1.469(7) . ? 
C7 H7A 0.9300 . ? 
C8 C13 1.388(7) . ? 
C8 C9 1.389(7) . ? 
C9 C10 1.369(7) . ? 
C9 H9A 0.9300 . ? 
C10 C11 1.377(8) . ? 
C11 C12 1.381(9) . ? 
C11 H11A 0.9300 . ? 
C12 C13 1.368(8) . ? 
C12 H12A 0.9300 . ? 
C13 H13A 0.9300 . ? 
 
loop_ 
 _geom_angle_atom_site_label_1 
 _geom_angle_atom_site_label_2 
 _geom_angle_atom_site_label_3 
 _geom_angle 
 _geom_angle_site_symmetry_1 
 _geom_angle_site_symmetry_3 
 _geom_angle_publ_flag 
C1 S1 C4 90.6(2) . . ? 
C2 C1 S1 113.6(4) . . ? 
C2 C1 Cl1 126.6(4) . . ? 
S1 C1 Cl1 119.8(3) . . ? 
C1 C2 C3 111.0(4) . . ? 
C1 C2 H2A 124.5 . . ? 
C3 C2 H2A 124.5 . . ? 
C4 C3 C2 113.6(4) . . ? 
C4 C3 H3A 123.2 . . ? 
C2 C3 H3A 123.2 . . ? 
C3 C4 C5 130.4(4) . . ? 
C3 C4 S1 111.2(3) . . ? 
C5 C4 S1 118.2(3) . . ? 
O1 C5 C4 120.1(4) . . ? 
O1 C5 C6 122.4(4) . . ? 
C4 C5 C6 117.5(4) . . ? 
C7 C6 C5 122.1(4) . . ? 
C7 C6 H6A 119.0 . . ? 
C5 C6 H6A 119.0 . . ? 
C6 C7 C8 127.4(5) . . ? 
C6 C7 H7A 116.3 . . ? 
C8 C7 H7A 116.3 . . ? 
C13 C8 C9 117.5(5) . . ? 
C13 C8 C7 119.9(5) . . ? 
C9 C8 C7 122.7(5) . . ? 
C10 C9 C8 118.7(5) . . ? 
C10 C9 H9A 120.7 . . ? 
C8 C9 H9A 120.7 . . ? 
F1 C10 C9 118.1(6) . . ? 
F1 C10 C11 118.2(6) . . ? 
C9 C10 C11 123.7(6) . . ? 
C10 C11 C12 117.9(6) . . ? 
C10 C11 H11A 121.1 . . ? 
C12 C11 H11A 121.1 . . ? 
C13 C12 C11 118.9(6) . . ? 
C13 C12 H12A 120.5 . . ? 
C11 C12 H12A 120.5 . . ? 
C12 C13 C8 123.4(6) . . ? 
C12 C13 H13A 118.3 . . ? 
C8 C13 H13A 118.3 . . ? 
 
loop_ 
 _geom_torsion_atom_site_label_1 
 _geom_torsion_atom_site_label_2 
 _geom_torsion_atom_site_label_3 
 _geom_torsion_atom_site_label_4 
 _geom_torsion 
 _geom_torsion_site_symmetry_1 
 _geom_torsion_site_symmetry_2 
 _geom_torsion_site_symmetry_3 
 _geom_torsion_site_symmetry_4 
 _geom_torsion_publ_flag 
C4 S1 C1 C2 -1.1(5) . . . . ? 
C4 S1 C1 Cl1 179.1(3) . . . . ? 
S1 C1 C2 C3 0.4(6) . . . . ? 
Cl1 C1 C2 C3 -179.8(4) . . . . ? 
C1 C2 C3 C4 0.8(7) . . . . ? 
C2 C3 C4 C5 -176.8(5) . . . . ? 
C2 C3 C4 S1 -1.6(6) . . . . ? 
C1 S1 C4 C3 1.5(4) . . . . ? 
C1 S1 C4 C5 177.3(4) . . . . ? 
C3 C4 C5 O1 174.4(5) . . . . ? 
S1 C4 C5 O1 -0.5(7) . . . . ? 
C3 C4 C5 C6 -6.3(8) . . . . ? 
S1 C4 C5 C6 178.8(4) . . . . ? 
O1 C5 C6 C7 8.1(8) . . . . ? 
C4 C5 C6 C7 -171.1(5) . . . . ? 
C5 C6 C7 C8 -179.5(5) . . . . ? 
C6 C7 C8 C13 -170.0(5) . . . . ? 
C6 C7 C8 C9 9.3(9) . . . . ? 
C13 C8 C9 C10 -0.2(8) . . . . ? 
C7 C8 C9 C10 -179.5(5) . . . . ? 
C8 C9 C10 F1 -179.1(6) . . . . ? 
C8 C9 C10 C11 0.3(9) . . . . ? 
F1 C10 C11 C12 178.6(6) . . . . ? 
C9 C10 C11 C12 -0.7(10) . . . . ? 
C10 C11 C12 C13 1.0(9) . . . . ? 
C11 C12 C13 C8 -0.9(9) . . . . ? 
C9 C8 C13 C12 0.5(9) . . . . ? 
C7 C8 C13 C12 179.8(5) . . . . ? 
 
_diffrn_measured_fraction_theta_max    0.998 
_diffrn_reflns_theta_full              25.00 
_diffrn_measured_fraction_theta_full   0.998 
_refine_diff_density_max    0.763 
_refine_diff_density_min   -0.299 
_refine_diff_density_rms    0.063 
#==============================================================
 
data_3c
 
_audit_creation_method            SHELXL-97 
_chemical_name_systematic 
; 
 ? 
; 
_chemical_name_common             ? 
_chemical_melting_point           ? 
_chemical_formula_moiety          'C13 H8 Cl F O S' 
_chemical_formula_sum 
 'C13 H8 Cl F O S' 
_chemical_formula_weight          266.70 
 
loop_ 
 _atom_type_symbol 
 _atom_type_description 
 _atom_type_scat_dispersion_real 
 _atom_type_scat_dispersion_imag 
 _atom_type_scat_source 
 'C'  'C'   0.0033   0.0016 
 'International Tables Vol C Tables 4.2.6.8 and 6.1.1.4' 
 'H'  'H'   0.0000   0.0000 
 'International Tables Vol C Tables 4.2.6.8 and 6.1.1.4' 
 'O'  'O'   0.0106   0.0060 
 'International Tables Vol C Tables 4.2.6.8 and 6.1.1.4' 
 'F'  'F'   0.0171   0.0103 
 'International Tables Vol C Tables 4.2.6.8 and 6.1.1.4' 
 'S'  'S'   0.1246   0.1234 
 'International Tables Vol C Tables 4.2.6.8 and 6.1.1.4' 
 'Cl'  'Cl'   0.1484   0.1585 
 'International Tables Vol C Tables 4.2.6.8 and 6.1.1.4' 
 

_symmetry_cell_setting               Orthorhombic
_symmetry_space_group_name_Hall      '-P 2ac 2ab'
_symmetry_space_group_name_H-M       'P b c a'
 
loop_ 
 _symmetry_equiv_pos_as_xyz 
 'x, y, z' 
 '-x+1/2, -y, z+1/2' 
 '-x, y+1/2, -z+1/2' 
 'x+1/2, -y+1/2, -z' 
 '-x, -y, -z' 
 'x-1/2, y, -z-1/2' 
 'x, -y-1/2, z-1/2' 
 '-x-1/2, y-1/2, z' 
 
_cell_length_a                    7.9809(8) 
_cell_length_b                    11.0207(11) 
_cell_length_c                    27.518(3) 
_cell_angle_alpha                 90.00 
_cell_angle_beta                  90.00 
_cell_angle_gamma                 90.00 
_cell_volume                      2420.3(4) 
_cell_formula_units_Z             8 
_cell_measurement_temperature     297(2)
_cell_measurement_reflns_used     4322
_cell_measurement_theta_min        3.24
_cell_measurement_theta_max       25.27
_exptl_crystal_description       'plate'
_exptl_crystal_colour            'colourless'
_exptl_crystal_size_max           0.79 
_exptl_crystal_size_mid           0.37 
_exptl_crystal_size_min           0.04 
_exptl_crystal_density_meas       ? 
_exptl_crystal_density_diffrn     1.464 
_exptl_crystal_density_method     'not measured' 
_exptl_crystal_F_000              1088 
_exptl_absorpt_coefficient_mu     0.479 
_exptl_absorpt_correction_type    'multi-scan'
_exptl_absorpt_correction_T_min   0.7038 
_exptl_absorpt_correction_T_max   0.9802 
_exptl_absorpt_process_details    '(<i>SADABS</i>; Bruker, 2009)'
 
_exptl_special_details 
; 
 ? 
; 
 
_diffrn_ambient_temperature       297(2) 
_diffrn_radiation_wavelength      0.71073 
_diffrn_radiation_type            MoK\a 
_diffrn_radiation_source          'fine-focus sealed tube' 
_diffrn_radiation_monochromator   graphite 
_diffrn_measurement_device_type   'Bruker APEX Duo CCD area detector'
_diffrn_measurement_method        '\f and \w scans'  
_diffrn_detector_area_resol_mean  ? 
_diffrn_standards_number          0 
_diffrn_standards_interval_count  . 
_diffrn_standards_interval_time   . 
_diffrn_standards_decay_%         ?
_diffrn_reflns_number             24679 
_diffrn_reflns_av_R_equivalents   0.0539 
_diffrn_reflns_av_sigmaI/netI     0.0366 
_diffrn_reflns_limit_h_min        -11 
_diffrn_reflns_limit_h_max        11 
_diffrn_reflns_limit_k_min        -15 
_diffrn_reflns_limit_k_max        15 
_diffrn_reflns_limit_l_min        -38 
_diffrn_reflns_limit_l_max        37 
_diffrn_reflns_theta_min          1.48 
_diffrn_reflns_theta_max          30.05 
_reflns_number_total              3540 
_reflns_number_gt                 2016 
_reflns_threshold_expression      'I > 2\s(I)' 
 
_computing_data_collection        'APEX2 (Bruker, 2009)' 
_computing_cell_refinement        'SAINT (Bruker, 2009)' 
_computing_data_reduction          SAINT
_computing_structure_solution     'SHELXTL (Sheldrick, 2008)' 
_computing_structure_refinement    SHELXTL 
_computing_molecular_graphics      SHELXTL 
_computing_publication_material
;
SHELXTL and PLATON (Spek, 2009)
;
 
_refine_special_details 
; 
 Refinement of F^2^ against ALL reflections.  The weighted R-factor wR and 
 goodness of fit S are based on F^2^, conventional R-factors R are based 
 on F, with F set to zero for negative F^2^. The threshold expression of 
 F^2^ > 2sigma(F^2^) is used only for calculating R-factors(gt) etc. and is 
 not relevant to the choice of reflections for refinement.  R-factors based 
 on F^2^ are statistically about twice as large as those based on F, and R- 
 factors based on ALL data will be even larger. 
; 

_iucr_refine_instructions_details
;
TITL mo_ch3_0m in Pbca  (RT)
CELL 0.71073   7.9809  11.0207  27.5178  90.000  90.000  90.000
ZERR    8.00   0.0008   0.0011   0.0025   0.000   0.000   0.000
LATT  1
SYMM 0.5-X, -Y, 0.5+Z
SYMM -X, 0.5+Y, 0.5-Z
SYMM 0.5+X, 0.5-Y, -Z
SFAC C H O F S CL
UNIT 104 64 8 8 8 8
TEMP 24.000
SIZE 0.042 0.369 0.789
L.S. 10
BOND $H
FMAP 2 1 60
PLAN 20
ACTA
CONF
WGHT      0.0459      1.0741 
FVAR       0.41108
CL1   6    0.009493    0.579609    0.350258    11.00000    0.07771    0.09376 =
         0.05862    0.01303   -0.00504   -0.00686
S1    5    0.099891    0.667111    0.448427    11.00000    0.07290    0.04724 =
         0.06719    0.00552   -0.00398    0.00304
F1    4    0.703145    0.300322    0.755843    11.00000    0.10900    0.14471 =
         0.07472    0.02098   -0.02796    0.00738
O1    3    0.200130    0.725320    0.548512    11.00000    0.09268    0.04802 =
         0.07205   -0.00682    0.00181    0.00247
C1    1    0.096699    0.554447    0.406238    11.00000    0.05038    0.06334 =
         0.05409    0.00605    0.00232   -0.00504
C2    1    0.166270    0.450421    0.422071    11.00000    0.08641    0.05580 =
         0.06296   -0.00844   -0.00211    0.00896
AFIX  43
H2A   2    0.174399    0.379970    0.403617    11.00000   -1.20000
AFIX   0
C3    1    0.224959    0.461681    0.469915    11.00000    0.07095    0.04942 =
         0.05937   -0.00156   -0.00507    0.01008
AFIX  43
H3A   2    0.276233    0.398657    0.486766    11.00000   -1.20000
AFIX   0
C4    1    0.199532    0.573877    0.489274    11.00000    0.04533    0.04290 =
         0.05829    0.00339    0.00752   -0.00214
C5    1    0.237988    0.620026    0.537638    11.00000    0.05213    0.04587 =
         0.05969   -0.00238    0.00795   -0.00545
C6    1    0.322240    0.538339    0.571765    11.00000    0.05984    0.04717 =
         0.05692   -0.00089    0.00304   -0.00354
AFIX  43
H6A   2    0.339113    0.458019    0.562628    11.00000   -1.20000
AFIX   0
C7    1    0.375637    0.573991    0.615224    11.00000    0.06416    0.05431 =
         0.05985   -0.00285    0.00355   -0.01122
AFIX  43
H7A   2    0.357082    0.654855    0.623250    11.00000   -1.20000
AFIX   0
C8    1    0.460184    0.500019    0.651690    11.00000    0.05405    0.06287 =
         0.05142   -0.00379    0.00392   -0.01019
C9    1    0.472167    0.374311    0.647910    11.00000    0.06897    0.06913 =
         0.05772   -0.00586   -0.00525   -0.00586
AFIX  43
H9A   2    0.424664    0.335384    0.621276    11.00000   -1.20000
AFIX   0
C10   1    0.552714    0.306634    0.682714    11.00000    0.07751    0.07496 =
         0.06525    0.00492   -0.00167    0.00021
AFIX  43
H10A  2    0.559685    0.222658    0.680065    11.00000   -1.20000
AFIX   0
C11   1    0.622482    0.366214    0.721425    11.00000    0.06423    0.10312 =
         0.05608    0.00931   -0.00341   -0.00236
C12   1    0.615575    0.488516    0.726956    11.00000    0.07964    0.11101 =
         0.05425   -0.00865   -0.00537   -0.02078
AFIX  43
H12A  2    0.665350    0.526507    0.753457    11.00000   -1.20000
AFIX   0
C13   1    0.532103    0.554488    0.691875    11.00000    0.07742    0.07584 =
         0.05433   -0.01089   -0.00013   -0.01490
AFIX  43
H13A  2    0.523956    0.638216    0.695365    11.00000   -1.20000
 
HKLF 4 1 0 -1 0 1 0 0 0 0 1
 
REM  mo_ch3_0m in Pbca  (RT)
REM R1 =  0.0465 for   2016 Fo > 4sig(Fo)  and  0.0961 for all   3540 data
REM    154 parameters refined using      0 restraints
 
END  
     
WGHT      0.0459      1.0741 
REM Highest difference peak  0.188,  deepest hole -0.269,  1-sigma level  0.041
Q1    1   0.0310  0.4802  0.3407  11.00000  0.05    0.19
Q2    1   0.1064  0.5827  0.4821  11.00000  0.05    0.17
Q3    1   0.1935  0.5154  0.4821  11.00000  0.05    0.15
Q4    1   0.5201  0.5925  0.6960  11.00000  0.05    0.14
Q5    1   0.2799  0.5807  0.4958  11.00000  0.05    0.14
Q6    1   0.3109  0.5848  0.5612  11.00000  0.05    0.14
Q7    1   0.2121  0.6643  0.4473  11.00000  0.05    0.14
Q8    1   0.6131  0.6524  0.6840  11.00000  0.05    0.13
Q9    1   0.5098  0.5015  0.7192  11.00000  0.05    0.13
Q10   1   0.0391  0.3472  0.4345  11.00000  0.05    0.13
Q11   1   0.4368  0.4533  0.6605  11.00000  0.05    0.13
Q12   1   0.4267  0.6930  0.6177  11.00000  0.05    0.13
Q13   1   0.7168  0.3907  0.7621  11.00000  0.05    0.13
Q14   1   0.0602  0.5460  0.5190  11.00000  0.05    0.13
Q15   1   0.5823  0.5661  0.6806  11.00000  0.05    0.13
Q16   1   0.7462  0.2934  0.6420  11.00000  0.05    0.12
Q17   1   0.1964  0.8408  0.5564  11.00000  0.05    0.12
Q18   1   0.3978  0.5562  0.5792  11.00000  0.05    0.12
Q19   1   0.5367  0.5155  0.6589  11.00000  0.05    0.12
Q20   1   0.5605  0.3471  0.7029  11.00000  0.05    0.12
;

 
_refine_ls_structure_factor_coef  Fsqd  
_refine_ls_matrix_type            full 
_refine_ls_weighting_scheme       calc  
_refine_ls_weighting_details 
 'calc w=1/[\s^2^(Fo^2^)+(0.0459P)^2^+1.0741P] where P=(Fo^2^+2Fc^2^)/3' 
_atom_sites_solution_primary      direct 
_atom_sites_solution_secondary    difmap 
_atom_sites_solution_hydrogens    geom 
_refine_ls_hydrogen_treatment     constr 
_refine_ls_extinction_method      none 
_refine_ls_extinction_coef        ? 
_refine_ls_number_reflns          3540 
_refine_ls_number_parameters      154 
_refine_ls_number_restraints      0 
_refine_ls_R_factor_all           0.0961 
_refine_ls_R_factor_gt            0.0465 
_refine_ls_wR_factor_ref          0.1353 
_refine_ls_wR_factor_gt           0.1119 
_refine_ls_goodness_of_fit_ref    1.026 
_refine_ls_restrained_S_all       1.026 
_refine_ls_shift/su_max           0.000 
_refine_ls_shift/su_mean          0.000 
 
loop_ 
 _atom_site_label 
 _atom_site_type_symbol 
 _atom_site_fract_x 
 _atom_site_fract_y 
 _atom_site_fract_z 
 _atom_site_U_iso_or_equiv 
 _atom_site_adp_type 
 _atom_site_occupancy 
 _atom_site_symmetry_multiplicity 
 _atom_site_calc_flag 
 _atom_site_refinement_flags 
 _atom_site_disorder_assembly 
 _atom_site_disorder_group 
Cl1 Cl 0.00949(10) 0.57961(7) 0.35026(2) 0.0767(2) Uani 1 1 d . . . 
S1 S 0.09989(9) 0.66711(5) 0.44843(2) 0.0624(2) Uani 1 1 d . . . 
F1 F 0.7031(3) 0.30032(19) 0.75584(6) 0.1095(7) Uani 1 1 d . . . 
O1 O 0.2001(3) 0.72532(14) 0.54851(6) 0.0709(5) Uani 1 1 d . . . 
C1 C 0.0967(3) 0.5544(2) 0.40624(8) 0.0559(6) Uani 1 1 d . . . 
C2 C 0.1663(4) 0.4504(2) 0.42207(9) 0.0684(7) Uani 1 1 d . . . 
H2A H 0.1744 0.3800 0.4036 0.082 Uiso 1 1 calc R . . 
C3 C 0.2250(3) 0.4617(2) 0.46992(8) 0.0599(6) Uani 1 1 d . . . 
H3A H 0.2762 0.3987 0.4868 0.072 Uiso 1 1 calc R . . 
C4 C 0.1995(3) 0.57388(17) 0.48927(8) 0.0488(5) Uani 1 1 d . . . 
C5 C 0.2380(3) 0.62003(19) 0.53764(8) 0.0526(5) Uani 1 1 d . . . 
C6 C 0.3222(3) 0.5383(2) 0.57176(8) 0.0546(6) Uani 1 1 d . . . 
H6A H 0.3391 0.4580 0.5626 0.066 Uiso 1 1 calc R . . 
C7 C 0.3756(3) 0.5740(2) 0.61522(8) 0.0594(6) Uani 1 1 d . . . 
H7A H 0.3571 0.6549 0.6232 0.071 Uiso 1 1 calc R . . 
C8 C 0.4602(3) 0.5000(2) 0.65169(8) 0.0561(6) Uani 1 1 d . . . 
C9 C 0.4722(3) 0.3743(2) 0.64791(9) 0.0653(7) Uani 1 1 d . . . 
H9A H 0.4247 0.3354 0.6213 0.078 Uiso 1 1 calc R . . 
C10 C 0.5527(4) 0.3066(3) 0.68271(9) 0.0726(7) Uani 1 1 d . . . 
H10A H 0.5597 0.2227 0.6801 0.087 Uiso 1 1 calc R . . 
C11 C 0.6225(4) 0.3662(3) 0.72143(9) 0.0745(8) Uani 1 1 d . . . 
C12 C 0.6156(4) 0.4885(3) 0.72696(10) 0.0816(8) Uani 1 1 d . . . 
H12A H 0.6654 0.5265 0.7535 0.098 Uiso 1 1 calc R . . 
C13 C 0.5321(4) 0.5545(2) 0.69187(9) 0.0692(7) Uani 1 1 d . . . 
H13A H 0.5240 0.6382 0.6954 0.083 Uiso 1 1 calc R . . 
 
loop_ 
 _atom_site_aniso_label 
 _atom_site_aniso_U_11 
 _atom_site_aniso_U_22 
 _atom_site_aniso_U_33 
 _atom_site_aniso_U_23 
 _atom_site_aniso_U_13 
 _atom_site_aniso_U_12 
Cl1 0.0777(5) 0.0938(5) 0.0586(4) 0.0130(3) -0.0050(3) -0.0069(4) 
S1 0.0729(5) 0.0472(3) 0.0672(4) 0.0055(3) -0.0040(3) 0.0030(3) 
F1 0.1090(15) 0.1447(16) 0.0747(11) 0.0210(11) -0.0280(10) 0.0074(13) 
O1 0.0927(14) 0.0480(9) 0.0721(11) -0.0068(8) 0.0018(10) 0.0025(9) 
C1 0.0504(14) 0.0633(13) 0.0541(12) 0.0061(10) 0.0023(11) -0.0050(11) 
C2 0.086(2) 0.0558(13) 0.0630(15) -0.0084(11) -0.0021(14) 0.0090(13) 
C3 0.0710(17) 0.0494(11) 0.0594(13) -0.0016(10) -0.0051(13) 0.0101(12) 
C4 0.0453(13) 0.0429(10) 0.0583(12) 0.0034(9) 0.0075(10) -0.0021(9) 
C5 0.0521(13) 0.0459(10) 0.0597(12) -0.0024(9) 0.0080(11) -0.0055(10) 
C6 0.0598(15) 0.0472(11) 0.0569(13) -0.0009(10) 0.0030(11) -0.0035(10) 
C7 0.0642(16) 0.0543(12) 0.0598(13) -0.0029(10) 0.0035(12) -0.0112(11) 
C8 0.0540(15) 0.0629(13) 0.0514(12) -0.0038(10) 0.0039(11) -0.0102(11) 
C9 0.0690(17) 0.0691(15) 0.0577(14) -0.0059(11) -0.0052(13) -0.0059(13) 
C10 0.0775(19) 0.0750(16) 0.0652(16) 0.0049(13) -0.0017(15) 0.0002(14) 
C11 0.0642(18) 0.103(2) 0.0561(15) 0.0093(14) -0.0034(13) -0.0024(16) 
C12 0.080(2) 0.111(2) 0.0543(15) -0.0087(15) -0.0054(14) -0.0208(18) 
C13 0.0774(19) 0.0758(16) 0.0543(14) -0.0109(12) -0.0001(13) -0.0149(14) 
 
_geom_special_details 
; 
 All esds (except the esd in the dihedral angle between two l.s. planes) 
 are estimated using the full covariance matrix.  The cell esds are taken 
 into account individually in the estimation of esds in distances, angles 
 and torsion angles; correlations between esds in cell parameters are only 
 used when they are defined by crystal symmetry.  An approximate (isotropic) 
 treatment of cell esds is used for estimating esds involving l.s. planes. 
; 
 
loop_ 
 _geom_bond_atom_site_label_1 
 _geom_bond_atom_site_label_2 
 _geom_bond_distance 
 _geom_bond_site_symmetry_2 
 _geom_bond_publ_flag 
Cl1 C1 1.713(2) . ? 
S1 C1 1.700(2) . ? 
S1 C4 1.718(2) . ? 
F1 C11 1.356(3) . ? 
O1 C5 1.236(3) . ? 
C1 C2 1.346(3) . ? 
C2 C3 1.403(3) . ? 
C2 H2A 0.9300 . ? 
C3 C4 1.362(3) . ? 
C3 H3A 0.9300 . ? 
C4 C5 1.457(3) . ? 
C5 C6 1.464(3) . ? 
C6 C7 1.329(3) . ? 
C6 H6A 0.9300 . ? 
C7 C8 1.458(3) . ? 
C7 H7A 0.9300 . ? 
C8 C13 1.383(3) . ? 
C8 C9 1.393(4) . ? 
C9 C10 1.374(4) . ? 
C9 H9A 0.9300 . ? 
C10 C11 1.370(4) . ? 
C10 H10A 0.9300 . ? 
C11 C12 1.358(4) . ? 
C12 C13 1.380(4) . ? 
C12 H12A 0.9300 . ? 
C13 H13A 0.9300 . ? 
 
loop_ 
 _geom_angle_atom_site_label_1 
 _geom_angle_atom_site_label_2 
 _geom_angle_atom_site_label_3 
 _geom_angle 
 _geom_angle_site_symmetry_1 
 _geom_angle_site_symmetry_3 
 _geom_angle_publ_flag 
C1 S1 C4 90.97(11) . . ? 
C2 C1 S1 113.25(19) . . ? 
C2 C1 Cl1 126.62(19) . . ? 
S1 C1 Cl1 120.13(14) . . ? 
C1 C2 C3 111.5(2) . . ? 
C1 C2 H2A 124.3 . . ? 
C3 C2 H2A 124.3 . . ? 
C4 C3 C2 113.4(2) . . ? 
C4 C3 H3A 123.3 . . ? 
C2 C3 H3A 123.3 . . ? 
C3 C4 C5 130.0(2) . . ? 
C3 C4 S1 110.86(17) . . ? 
C5 C4 S1 119.09(15) . . ? 
O1 C5 C4 119.8(2) . . ? 
O1 C5 C6 122.3(2) . . ? 
C4 C5 C6 117.89(19) . . ? 
C7 C6 C5 122.9(2) . . ? 
C7 C6 H6A 118.6 . . ? 
C5 C6 H6A 118.6 . . ? 
C6 C7 C8 127.0(2) . . ? 
C6 C7 H7A 116.5 . . ? 
C8 C7 H7A 116.5 . . ? 
C13 C8 C9 117.6(2) . . ? 
C13 C8 C7 120.0(2) . . ? 
C9 C8 C7 122.4(2) . . ? 
C10 C9 C8 121.3(2) . . ? 
C10 C9 H9A 119.3 . . ? 
C8 C9 H9A 119.3 . . ? 
C11 C10 C9 118.2(3) . . ? 
C11 C10 H10A 120.9 . . ? 
C9 C10 H10A 120.9 . . ? 
F1 C11 C12 118.2(3) . . ? 
F1 C11 C10 118.7(3) . . ? 
C12 C11 C10 123.1(3) . . ? 
C11 C12 C13 117.7(3) . . ? 
C11 C12 H12A 121.2 . . ? 
C13 C12 H12A 121.2 . . ? 
C12 C13 C8 122.1(3) . . ? 
C12 C13 H13A 119.0 . . ? 
C8 C13 H13A 119.0 . . ? 
 
loop_ 
 _geom_torsion_atom_site_label_1 
 _geom_torsion_atom_site_label_2 
 _geom_torsion_atom_site_label_3 
 _geom_torsion_atom_site_label_4 
 _geom_torsion 
 _geom_torsion_site_symmetry_1 
 _geom_torsion_site_symmetry_2 
 _geom_torsion_site_symmetry_3 
 _geom_torsion_site_symmetry_4 
 _geom_torsion_publ_flag 
C4 S1 C1 C2 0.5(2) . . . . ? 
C4 S1 C1 Cl1 -179.90(16) . . . . ? 
S1 C1 C2 C3 -0.2(3) . . . . ? 
Cl1 C1 C2 C3 -179.8(2) . . . . ? 
C1 C2 C3 C4 -0.3(4) . . . . ? 
C2 C3 C4 C5 178.2(2) . . . . ? 
C2 C3 C4 S1 0.6(3) . . . . ? 
C1 S1 C4 C3 -0.63(19) . . . . ? 
C1 S1 C4 C5 -178.47(19) . . . . ? 
C3 C4 C5 O1 -178.0(2) . . . . ? 
S1 C4 C5 O1 -0.6(3) . . . . ? 
C3 C4 C5 C6 2.4(4) . . . . ? 
S1 C4 C5 C6 179.71(17) . . . . ? 
O1 C5 C6 C7 -5.4(4) . . . . ? 
C4 C5 C6 C7 174.2(2) . . . . ? 
C5 C6 C7 C8 179.9(2) . . . . ? 
C6 C7 C8 C13 169.5(3) . . . . ? 
C6 C7 C8 C9 -10.5(4) . . . . ? 
C13 C8 C9 C10 -0.1(4) . . . . ? 
C7 C8 C9 C10 179.9(2) . . . . ? 
C8 C9 C10 C11 -0.4(4) . . . . ? 
C9 C10 C11 F1 -179.6(2) . . . . ? 
C9 C10 C11 C12 0.1(5) . . . . ? 
F1 C11 C12 C13 -179.5(3) . . . . ? 
C10 C11 C12 C13 0.8(5) . . . . ? 
C11 C12 C13 C8 -1.3(4) . . . . ? 
C9 C8 C13 C12 1.0(4) . . . . ? 
C7 C8 C13 C12 -179.0(3) . . . . ? 
 
_diffrn_measured_fraction_theta_max    0.997 
_diffrn_reflns_theta_full              30.05 
_diffrn_measured_fraction_theta_full   0.997 
_refine_diff_density_max    0.188 
_refine_diff_density_min   -0.269 
_refine_diff_density_rms    0.041 

loop_
_geom_hbond_atom_site_label_D
_geom_hbond_atom_site_label_H
_geom_hbond_atom_site_label_A
_geom_hbond_distance_DH
_geom_hbond_distance_HA
_geom_hbond_distance_DA
_geom_hbond_angle_DHA
_geom_hbond_site_symmetry_A
_geom_hbond_publ_flag
#
#D   H   A   D - H  H...A   D...A    D - H...A  symm(A)
#
C3      H3A     O1          0.9300     2.5600   3.438(3)     157.00   8_655 yes
C9      H9A     O1          0.9300     2.5400   3.474(3)     179.00   8_655 yes
#=============================================================
 
data_3d
 
_audit_creation_method            SHELXL-97 
_chemical_name_systematic 
; 
 ? 
; 
_chemical_name_common             ? 
_chemical_melting_point           ? 
_chemical_formula_moiety         'C13 H7 Cl2 F O S'
_chemical_formula_sum 
 'C13 H7 Cl2 F O S' 
_chemical_formula_weight          301.15 
 
loop_ 
 _atom_type_symbol 
 _atom_type_description 
 _atom_type_scat_dispersion_real 
 _atom_type_scat_dispersion_imag 
 _atom_type_scat_source 
 'C'  'C'   0.0033   0.0016 
 'International Tables Vol C Tables 4.2.6.8 and 6.1.1.4' 
 'H'  'H'   0.0000   0.0000 
 'International Tables Vol C Tables 4.2.6.8 and 6.1.1.4' 
 'O'  'O'   0.0106   0.0060 
 'International Tables Vol C Tables 4.2.6.8 and 6.1.1.4' 
 'S'  'S'   0.1246   0.1234 
 'International Tables Vol C Tables 4.2.6.8 and 6.1.1.4' 
 'F'  'F'   0.0171   0.0103 
 'International Tables Vol C Tables 4.2.6.8 and 6.1.1.4' 
 'Cl'  'Cl'   0.1484   0.1585 
 'International Tables Vol C Tables 4.2.6.8 and 6.1.1.4' 
 

_symmetry_cell_setting               Orthorhombic
_symmetry_space_group_name_Hall      '-P 2ac 2ab'
_symmetry_space_group_name_H-M       'P b c a'
 
loop_ 
 _symmetry_equiv_pos_as_xyz 
 'x, y, z' 
 '-x+1/2, -y, z+1/2' 
 '-x, y+1/2, -z+1/2' 
 'x+1/2, -y+1/2, -z' 
 '-x, -y, -z' 
 'x-1/2, y, -z-1/2' 
 'x, -y-1/2, z-1/2' 
 '-x-1/2, y-1/2, z' 
 
_cell_length_a                    7.4870(9) 
_cell_length_b                    11.6186(14) 
_cell_length_c                    29.239(4) 
_cell_angle_alpha                 90.00 
_cell_angle_beta                  90.00 
_cell_angle_gamma                 90.00 
_cell_volume                      2543.4(5) 
_cell_formula_units_Z             8 
_cell_measurement_temperature     297(2)
_cell_measurement_reflns_used     3573
_cell_measurement_theta_min        2.79
_cell_measurement_theta_max       26.43
_exptl_crystal_description       'plate'
_exptl_crystal_colour            'colourless' 
_exptl_crystal_size_max           0.75 
_exptl_crystal_size_mid           0.52 
_exptl_crystal_size_min           0.10 
_exptl_crystal_density_meas       ? 
_exptl_crystal_density_diffrn     1.573 
_exptl_crystal_density_method     'not measured' 
_exptl_crystal_F_000              1216 
_exptl_absorpt_coefficient_mu     0.669 
_exptl_absorpt_correction_type    'multi-scan'
_exptl_absorpt_correction_T_min   0.6333 
_exptl_absorpt_correction_T_max   0.9349 
_exptl_absorpt_process_details    '(<i>SADABS</i>; Bruker, 2009)'
 
_exptl_special_details 
; 
 ? 
; 
 
_diffrn_ambient_temperature       297(2) 
_diffrn_radiation_wavelength      0.71073 
_diffrn_radiation_type            MoK\a 
_diffrn_radiation_source          'fine-focus sealed tube' 
_diffrn_radiation_monochromator   graphite 
_diffrn_measurement_device_type   'Bruker APEX Duo CCD area detector'
_diffrn_measurement_method        '\f and \w scans'  
_diffrn_detector_area_resol_mean  ? 
_diffrn_standards_number          0 
_diffrn_standards_interval_count  . 
_diffrn_standards_interval_time   . 
_diffrn_standards_decay_%         ?
_diffrn_reflns_number             16026 
_diffrn_reflns_av_R_equivalents   0.0398 
_diffrn_reflns_av_sigmaI/netI     0.0353 
_diffrn_reflns_limit_h_min        -10 
_diffrn_reflns_limit_h_max        10 
_diffrn_reflns_limit_k_min        -14 
_diffrn_reflns_limit_k_max        16 
_diffrn_reflns_limit_l_min        -41 
_diffrn_reflns_limit_l_max        37 
_diffrn_reflns_theta_min          2.79 
_diffrn_reflns_theta_max          30.11 
_reflns_number_total              3738 
_reflns_number_gt                 2486 
_reflns_threshold_expression      'I > 2\s(I)'
 
_computing_data_collection        'APEX2 (Bruker, 2009)' 
_computing_cell_refinement        'SAINT (Bruker, 2009)' 
_computing_data_reduction          SAINT
_computing_structure_solution     'SHELXTL (Sheldrick, 2008)' 
_computing_structure_refinement    SHELXTL 
_computing_molecular_graphics      SHELXTL 
_computing_publication_material
;
SHELXTL and PLATON (Spek, 2009)
; 
 
_refine_special_details 
; 
 Refinement of F^2^ against ALL reflections.  The weighted R-factor wR and 
 goodness of fit S are based on F^2^, conventional R-factors R are based 
 on F, with F set to zero for negative F^2^. The threshold expression of 
 F^2^ > 2sigma(F^2^) is used only for calculating R-factors(gt) etc. and is 
 not relevant to the choice of reflections for refinement.  R-factors based 
 on F^2^ are statistically about twice as large as those based on F, and R- 
 factors based on ALL data will be even larger. 
; 

_iucr_refine_instructions_details
;
TITL mo_ch12_0m in Pbca  (RT)
CELL 0.71073   7.4870  11.6186  29.2388  90.000  90.000  90.000
ZERR    8.00   0.0009   0.0014   0.0036   0.000   0.000   0.000
LATT  1
SYMM 0.5-X, -Y, 0.5+Z
SYMM -X, 0.5+Y, 0.5-Z
SYMM 0.5+X, 0.5-Y, -Z
SFAC C H O S F CL
UNIT 104 56 8 8 8 16
TEMP 24.000
SIZE 0.102 0.518 0.752
L.S. 10
BOND $H
FMAP 2 1 60
PLAN 20
ACTA
CONF
WGHT    0.071900    0.117800
FVAR       0.37522
CL1   6    0.043204    0.896427    0.359476    11.00000    0.06987    0.06547 =
         0.05832   -0.01179   -0.00522    0.00302
CL2   6    0.565991    1.307997    0.674832    11.00000    0.10688    0.05566 =
         0.07527   -0.00807   -0.01071   -0.01078
S1    4    0.111852    0.815633    0.454024    11.00000    0.06765    0.03672 =
         0.06683   -0.00547   -0.00828   -0.00466
F1    5    0.652652    1.172332    0.755693    11.00000    0.11730    0.09994 =
         0.06185   -0.01658   -0.02744    0.01068
O1    3    0.181315    0.764038    0.550750    11.00000    0.07864    0.04308 =
         0.07318    0.00631   -0.00467   -0.00920
C1    1    0.121056    0.921923    0.413704    11.00000    0.04655    0.04601 =
         0.05813   -0.00769    0.00224    0.00205
C2    1    0.190101    1.021976    0.429904    11.00000    0.06636    0.04761 =
         0.05818    0.00291   -0.00076   -0.00859
AFIX  43
H2A   2    0.204480    1.088378    0.412529    11.00000   -1.20000
AFIX   0
C3    1    0.237157    1.012384    0.476365    11.00000    0.05895    0.04113 =
         0.05990   -0.00301   -0.00229   -0.00821
AFIX  43
H3A   2    0.286269    1.072538    0.493163    11.00000   -1.20000
AFIX   0
C4    1    0.203627    0.906137    0.494339    11.00000    0.04187    0.03682 =
         0.05793   -0.00463    0.00082    0.00033
C5    1    0.225878    0.863388    0.540998    11.00000    0.04406    0.04026 =
         0.06217    0.00014    0.00224    0.00293
C6    1    0.304483    0.942797    0.574538    11.00000    0.05094    0.03943 =
         0.05997    0.00144    0.00163    0.00093
AFIX  43
H6A   2    0.325761    1.018650    0.565966    11.00000   -1.20000
AFIX   0
C7    1    0.346014    0.909861    0.616579    11.00000    0.05305    0.04147 =
         0.05845    0.00462    0.00254    0.00197
AFIX  43
H7A   2    0.321879    0.833596    0.624001    11.00000   -1.20000
AFIX   0
C8    1    0.425784    0.980561    0.652603    11.00000    0.04977    0.04912 =
         0.04866    0.00427    0.00633    0.00688
C9    1    0.453249    1.098877    0.647053    11.00000    0.05160    0.04944 =
         0.04367    0.00287   -0.00183    0.00373
AFIX  43
H9A   2    0.419986    1.134528    0.619878    11.00000   -1.20000
AFIX   0
C10   1    0.529150    1.162715    0.681558    11.00000    0.05357    0.05224 =
         0.05145   -0.00132    0.00265    0.00555
C11   1    0.577985    1.109309    0.722023    11.00000    0.06715    0.07709 =
         0.04283   -0.00800   -0.00522    0.01062
C12   1    0.552707    0.993707    0.728210    11.00000    0.09302    0.07914 =
         0.04534    0.01430   -0.00557    0.01389
AFIX  43
H12A  2    0.587122    0.958729    0.755428    11.00000   -1.20000
AFIX   0
C13   1    0.476130    0.929717    0.693922    11.00000    0.07990    0.05772 =
         0.05662    0.01499    0.00322    0.00940
AFIX  43
H13A  2    0.457522    0.851342    0.698286    11.00000   -1.20000
 
HKLF 4
 
REM  mo_ch12_0m in Pbca  (RT)
REM R1 =  0.0411 for   2486 Fo > 4sig(Fo)  and  0.0677 for all   3738 data
REM    163 parameters refined using      0 restraints
 
END  
     
WGHT      0.0719      0.1178 
REM Highest difference peak  0.197,  deepest hole -0.269,  1-sigma level  0.054
Q1    1   0.1096  0.8368  0.3634  11.00000  0.05    0.20
Q2    1   0.5460  1.1884  0.7594  11.00000  0.05    0.16
Q3    1   0.4540  1.2738  0.6821  11.00000  0.05    0.16
Q4    1  -0.0412  0.7032  0.5027  11.00000  0.05    0.16
Q5    1   0.6154  1.0437  0.7189  11.00000  0.05    0.15
Q6    1   0.8058  1.1880  0.7219  11.00000  0.05    0.15
Q7    1   0.1097  1.1641  0.5163  11.00000  0.05    0.15
Q8    1   0.5509  0.8307  0.6963  11.00000  0.05    0.14
Q9    1   0.3987  1.0648  0.7229  11.00000  0.05    0.14
Q10   1   0.2100  0.9556  0.4165  11.00000  0.05    0.14
Q11   1   0.2591  0.9402  0.4832  11.00000  0.05    0.14
Q12   1   0.8391  1.1121  0.7250  11.00000  0.05    0.14
Q13   1   0.1019  0.9758  0.4172  11.00000  0.05    0.14
Q14   1   0.1049  0.7988  0.5429  11.00000  0.05    0.14
Q15   1   0.6957  0.8378  0.7001  11.00000  0.05    0.14
Q16   1   0.5960  1.1211  0.6966  11.00000  0.05    0.14
Q17   1   0.0598  1.1389  0.4030  11.00000  0.05    0.14
Q18   1   0.6431  1.2666  0.6830  11.00000  0.05    0.14
Q19   1   0.3064  1.1335  0.6171  11.00000  0.05    0.14
Q20   1   0.3869  0.9528  0.6055  11.00000  0.05    0.13
;
 
_refine_ls_structure_factor_coef  Fsqd  
_refine_ls_matrix_type            full 
_refine_ls_weighting_scheme       calc  
_refine_ls_weighting_details 
 'calc w=1/[\s^2^(Fo^2^)+(0.0719P)^2^+0.1178P] where P=(Fo^2^+2Fc^2^)/3' 
_atom_sites_solution_primary      direct 
_atom_sites_solution_secondary    difmap 
_atom_sites_solution_hydrogens    geom 
_refine_ls_hydrogen_treatment     constr 
_refine_ls_extinction_method      none 
_refine_ls_extinction_coef        ? 
_refine_ls_number_reflns          3738 
_refine_ls_number_parameters      163 
_refine_ls_number_restraints      0 
_refine_ls_R_factor_all           0.0677 
_refine_ls_R_factor_gt            0.0411 
_refine_ls_wR_factor_ref          0.1347 
_refine_ls_wR_factor_gt           0.1159 
_refine_ls_goodness_of_fit_ref    1.032 
_refine_ls_restrained_S_all       1.032 
_refine_ls_shift/su_max           0.001 
_refine_ls_shift/su_mean          0.000 
 
loop_ 
 _atom_site_label 
 _atom_site_type_symbol 
 _atom_site_fract_x 
 _atom_site_fract_y 
 _atom_site_fract_z 
 _atom_site_U_iso_or_equiv 
 _atom_site_adp_type 
 _atom_site_occupancy 
 _atom_site_symmetry_multiplicity 
 _atom_site_calc_flag 
 _atom_site_refinement_flags 
 _atom_site_disorder_assembly 
 _atom_site_disorder_group 
Cl1 Cl 0.04320(7) 0.89643(5) 0.359476(17) 0.06456(18) Uani 1 1 d . . . 
Cl2 Cl 0.56599(10) 1.30800(5) 0.67483(2) 0.0793(2) Uani 1 1 d . . . 
S1 S 0.11185(7) 0.81563(4) 0.454024(18) 0.05707(17) Uani 1 1 d . . . 
F1 F 0.6527(2) 1.17233(14) 0.75569(5) 0.0930(5) Uani 1 1 d . . . 
O1 O 0.1813(2) 0.76404(11) 0.55075(5) 0.0650(4) Uani 1 1 d . . . 
C1 C 0.1211(2) 0.92192(16) 0.41370(7) 0.0502(4) Uani 1 1 d . . . 
C2 C 0.1901(3) 1.02198(16) 0.42990(7) 0.0574(5) Uani 1 1 d . . . 
H2A H 0.2045 1.0884 0.4125 0.069 Uiso 1 1 calc R . . 
C3 C 0.2372(3) 1.01238(15) 0.47637(7) 0.0533(4) Uani 1 1 d . . . 
H3A H 0.2863 1.0725 0.4932 0.064 Uiso 1 1 calc R . . 
C4 C 0.2036(2) 0.90614(14) 0.49434(6) 0.0455(4) Uani 1 1 d . . . 
C5 C 0.2259(2) 0.86339(16) 0.54100(6) 0.0488(4) Uani 1 1 d . . . 
C6 C 0.3045(2) 0.94280(15) 0.57454(6) 0.0501(4) Uani 1 1 d . . . 
H6A H 0.3258 1.0187 0.5660 0.060 Uiso 1 1 calc R . . 
C7 C 0.3460(2) 0.90986(16) 0.61658(6) 0.0510(4) Uani 1 1 d . . . 
H7A H 0.3219 0.8336 0.6240 0.061 Uiso 1 1 calc R . . 
C8 C 0.4258(2) 0.98056(16) 0.65260(6) 0.0492(4) Uani 1 1 d . . . 
C9 C 0.4532(2) 1.09888(15) 0.64705(6) 0.0482(4) Uani 1 1 d . . . 
H9A H 0.4200 1.1345 0.6199 0.058 Uiso 1 1 calc R . . 
C10 C 0.5292(3) 1.16272(17) 0.68156(6) 0.0524(4) Uani 1 1 d . . . 
C11 C 0.5780(3) 1.1093(2) 0.72202(7) 0.0624(5) Uani 1 1 d . . . 
C12 C 0.5527(3) 0.9937(2) 0.72821(7) 0.0725(6) Uani 1 1 d . . . 
H12A H 0.5871 0.9587 0.7554 0.087 Uiso 1 1 calc R . . 
C13 C 0.4761(3) 0.9297(2) 0.69392(7) 0.0647(5) Uani 1 1 d . . . 
H13A H 0.4575 0.8513 0.6983 0.078 Uiso 1 1 calc R . . 
 
loop_ 
 _atom_site_aniso_label 
 _atom_site_aniso_U_11 
 _atom_site_aniso_U_22 
 _atom_site_aniso_U_33 
 _atom_site_aniso_U_23 
 _atom_site_aniso_U_13 
 _atom_site_aniso_U_12 
Cl1 0.0699(3) 0.0655(3) 0.0583(3) -0.0118(2) -0.0052(2) 0.0030(2) 
Cl2 0.1069(5) 0.0557(3) 0.0753(4) -0.0081(3) -0.0107(3) -0.0108(3) 
S1 0.0676(3) 0.0367(3) 0.0668(3) -0.0055(2) -0.0083(2) -0.0047(2) 
F1 0.1173(12) 0.0999(11) 0.0618(8) -0.0166(7) -0.0274(8) 0.0107(9) 
O1 0.0786(10) 0.0431(8) 0.0732(9) 0.0063(6) -0.0047(7) -0.0092(7) 
C1 0.0465(9) 0.0460(10) 0.0581(10) -0.0077(8) 0.0022(7) 0.0020(8) 
C2 0.0664(12) 0.0476(11) 0.0582(11) 0.0029(8) -0.0008(9) -0.0086(9) 
C3 0.0589(11) 0.0411(9) 0.0599(10) -0.0030(8) -0.0023(8) -0.0082(8) 
C4 0.0419(8) 0.0368(8) 0.0579(10) -0.0046(7) 0.0008(7) 0.0003(7) 
C5 0.0441(9) 0.0403(9) 0.0622(10) 0.0001(8) 0.0022(7) 0.0029(8) 
C6 0.0509(10) 0.0394(9) 0.0600(10) 0.0014(8) 0.0016(8) 0.0009(8) 
C7 0.0531(10) 0.0415(10) 0.0584(10) 0.0046(8) 0.0025(8) 0.0020(8) 
C8 0.0498(10) 0.0491(10) 0.0487(9) 0.0043(8) 0.0063(7) 0.0069(8) 
C9 0.0516(10) 0.0494(10) 0.0437(8) 0.0029(7) -0.0018(7) 0.0037(8) 
C10 0.0536(10) 0.0522(11) 0.0514(10) -0.0013(8) 0.0026(8) 0.0055(8) 
C11 0.0671(12) 0.0771(15) 0.0428(9) -0.0080(9) -0.0052(8) 0.0106(11) 
C12 0.0930(17) 0.0791(15) 0.0453(10) 0.0143(10) -0.0056(10) 0.0139(13) 
C13 0.0799(14) 0.0577(12) 0.0566(11) 0.0150(10) 0.0032(10) 0.0094(10) 
 
_geom_special_details 
; 
 All esds (except the esd in the dihedral angle between two l.s. planes) 
 are estimated using the full covariance matrix.  The cell esds are taken 
 into account individually in the estimation of esds in distances, angles 
 and torsion angles; correlations between esds in cell parameters are only 
 used when they are defined by crystal symmetry.  An approximate (isotropic) 
 treatment of cell esds is used for estimating esds involving l.s. planes. 
; 
 
loop_ 
 _geom_bond_atom_site_label_1 
 _geom_bond_atom_site_label_2 
 _geom_bond_distance 
 _geom_bond_site_symmetry_2 
 _geom_bond_publ_flag 
Cl1 C1 1.715(2) . ? 
Cl2 C10 1.722(2) . ? 
S1 C1 1.709(2) . ? 
S1 C4 1.7226(17) . ? 
F1 C11 1.348(2) . ? 
O1 C5 1.235(2) . ? 
C1 C2 1.358(3) . ? 
C2 C3 1.408(3) . ? 
C2 H2A 0.9300 . ? 
C3 C4 1.365(2) . ? 
C3 H3A 0.9300 . ? 
C4 C5 1.461(3) . ? 
C5 C6 1.469(3) . ? 
C6 C7 1.324(3) . ? 
C6 H6A 0.9300 . ? 
C7 C8 1.463(3) . ? 
C7 H7A 0.9300 . ? 
C8 C13 1.397(3) . ? 
C8 C9 1.399(3) . ? 
C9 C10 1.375(3) . ? 
C9 H9A 0.9300 . ? 
C10 C11 1.385(3) . ? 
C11 C12 1.368(3) . ? 
C12 C13 1.374(3) . ? 
C12 H12A 0.9300 . ? 
C13 H13A 0.9300 . ? 
 
loop_ 
 _geom_angle_atom_site_label_1 
 _geom_angle_atom_site_label_2 
 _geom_angle_atom_site_label_3 
 _geom_angle 
 _geom_angle_site_symmetry_1 
 _geom_angle_site_symmetry_3 
 _geom_angle_publ_flag 
C1 S1 C4 90.85(9) . . ? 
C2 C1 S1 113.17(15) . . ? 
C2 C1 Cl1 126.86(16) . . ? 
S1 C1 Cl1 119.95(11) . . ? 
C1 C2 C3 111.36(17) . . ? 
C1 C2 H2A 124.3 . . ? 
C3 C2 H2A 124.3 . . ? 
C4 C3 C2 113.40(16) . . ? 
C4 C3 H3A 123.3 . . ? 
C2 C3 H3A 123.3 . . ? 
C3 C4 C5 130.23(17) . . ? 
C3 C4 S1 111.22(14) . . ? 
C5 C4 S1 118.48(13) . . ? 
O1 C5 C4 120.16(17) . . ? 
O1 C5 C6 122.75(17) . . ? 
C4 C5 C6 117.08(16) . . ? 
C7 C6 C5 122.14(17) . . ? 
C7 C6 H6A 118.9 . . ? 
C5 C6 H6A 118.9 . . ? 
C6 C7 C8 126.99(17) . . ? 
C6 C7 H7A 116.5 . . ? 
C8 C7 H7A 116.5 . . ? 
C13 C8 C9 118.43(19) . . ? 
C13 C8 C7 119.70(19) . . ? 
C9 C8 C7 121.87(16) . . ? 
C10 C9 C8 120.36(17) . . ? 
C10 C9 H9A 119.8 . . ? 
C8 C9 H9A 119.8 . . ? 
C9 C10 C11 119.6(2) . . ? 
C9 C10 Cl2 120.75(15) . . ? 
C11 C10 Cl2 119.64(16) . . ? 
F1 C11 C12 119.60(19) . . ? 
F1 C11 C10 119.3(2) . . ? 
C12 C11 C10 121.1(2) . . ? 
C11 C12 C13 119.51(19) . . ? 
C11 C12 H12A 120.2 . . ? 
C13 C12 H12A 120.2 . . ? 
C12 C13 C8 121.0(2) . . ? 
C12 C13 H13A 119.5 . . ? 
C8 C13 H13A 119.5 . . ? 
 
loop_ 
 _geom_torsion_atom_site_label_1 
 _geom_torsion_atom_site_label_2 
 _geom_torsion_atom_site_label_3 
 _geom_torsion_atom_site_label_4 
 _geom_torsion 
 _geom_torsion_site_symmetry_1 
 _geom_torsion_site_symmetry_2 
 _geom_torsion_site_symmetry_3 
 _geom_torsion_site_symmetry_4 
 _geom_torsion_publ_flag 
C4 S1 C1 C2 -0.16(16) . . . . ? 
C4 S1 C1 Cl1 -179.00(12) . . . . ? 
S1 C1 C2 C3 0.0(2) . . . . ? 
Cl1 C1 C2 C3 178.78(15) . . . . ? 
C1 C2 C3 C4 0.1(3) . . . . ? 
C2 C3 C4 C5 -177.07(18) . . . . ? 
C2 C3 C4 S1 -0.3(2) . . . . ? 
C1 S1 C4 C3 0.24(15) . . . . ? 
C1 S1 C4 C5 177.47(14) . . . . ? 
C3 C4 C5 O1 177.44(19) . . . . ? 
S1 C4 C5 O1 0.8(2) . . . . ? 
C3 C4 C5 C6 -3.4(3) . . . . ? 
S1 C4 C5 C6 -179.97(13) . . . . ? 
O1 C5 C6 C7 5.6(3) . . . . ? 
C4 C5 C6 C7 -173.59(18) . . . . ? 
C5 C6 C7 C8 179.45(17) . . . . ? 
C6 C7 C8 C13 -174.3(2) . . . . ? 
C6 C7 C8 C9 5.9(3) . . . . ? 
C13 C8 C9 C10 0.4(3) . . . . ? 
C7 C8 C9 C10 -179.77(17) . . . . ? 
C8 C9 C10 C11 -0.2(3) . . . . ? 
C8 C9 C10 Cl2 179.22(14) . . . . ? 
C9 C10 C11 F1 179.88(17) . . . . ? 
Cl2 C10 C11 F1 0.5(3) . . . . ? 
C9 C10 C11 C12 0.3(3) . . . . ? 
Cl2 C10 C11 C12 -179.12(17) . . . . ? 
F1 C11 C12 C13 179.8(2) . . . . ? 
C10 C11 C12 C13 -0.6(3) . . . . ? 
C11 C12 C13 C8 0.8(4) . . . . ? 
C9 C8 C13 C12 -0.7(3) . . . . ? 
C7 C8 C13 C12 179.4(2) . . . . ? 
 
_diffrn_measured_fraction_theta_max    0.994 
_diffrn_reflns_theta_full              30.11 
_diffrn_measured_fraction_theta_full   0.994 
_refine_diff_density_max    0.197 
_refine_diff_density_min   -0.269 
_refine_diff_density_rms    0.054 
#==============================================================================
data_3e
 
_audit_creation_method            SHELXL-97 
_chemical_name_systematic 
; 
 ? 
; 
_chemical_name_common             ? 
_chemical_melting_point           ? 
_chemical_formula_moiety          'C13 H7 Br Cl F O S' 
_chemical_formula_sum 
 'C13 H7 Br Cl F O S' 
_chemical_formula_weight          345.61 
 
loop_ 
 _atom_type_symbol 
 _atom_type_description 
 _atom_type_scat_dispersion_real 
 _atom_type_scat_dispersion_imag 
 _atom_type_scat_source 
 'C'  'C'   0.0033   0.0016 
 'International Tables Vol C Tables 4.2.6.8 and 6.1.1.4' 
 'H'  'H'   0.0000   0.0000 
 'International Tables Vol C Tables 4.2.6.8 and 6.1.1.4' 
 'O'  'O'   0.0106   0.0060 
 'International Tables Vol C Tables 4.2.6.8 and 6.1.1.4' 
 'F'  'F'   0.0171   0.0103 
 'International Tables Vol C Tables 4.2.6.8 and 6.1.1.4' 
 'S'  'S'   0.1246   0.1234 
 'International Tables Vol C Tables 4.2.6.8 and 6.1.1.4' 
 'Cl'  'Cl'   0.1484   0.1585 
 'International Tables Vol C Tables 4.2.6.8 and 6.1.1.4' 
 'Br'  'Br'  -0.2901   2.4595 
 'International Tables Vol C Tables 4.2.6.8 and 6.1.1.4' 
 
_symmetry_cell_setting               Orthorhombic
_symmetry_space_group_name_Hall      '-P 2ac 2ab'
_symmetry_space_group_name_H-M       'P b c a'
 
loop_ 
 _symmetry_equiv_pos_as_xyz 
 'x, y, z' 
 '-x+1/2, -y, z+1/2' 
 '-x, y+1/2, -z+1/2' 
 'x+1/2, -y+1/2, -z' 
 '-x, -y, -z' 
 'x-1/2, y, -z-1/2' 
 'x, -y-1/2, z-1/2' 
 '-x-1/2, y-1/2, z' 
 
_cell_length_a                    7.476(2) 
_cell_length_b                    11.724(3) 
_cell_length_c                    30.009(8) 
_cell_angle_alpha                 90.00 
_cell_angle_beta                  90.00 
_cell_angle_gamma                 90.00 
_cell_volume                      2630.4(13) 
_cell_formula_units_Z             8 
_cell_measurement_temperature     297(2)
_cell_measurement_reflns_used     2826
_cell_measurement_theta_min       2.71
_cell_measurement_theta_max       25.32
_exptl_crystal_description       'block'
_exptl_crystal_colour            'colourless'
_exptl_crystal_size_max           0.58 
_exptl_crystal_size_mid           0.28 
_exptl_crystal_size_min           0.09 
_exptl_crystal_density_meas       ? 
_exptl_crystal_density_diffrn     1.745 
_exptl_crystal_density_method     'not measured' 
_exptl_crystal_F_000              1360 
_exptl_absorpt_coefficient_mu     3.482 
_exptl_absorpt_correction_type    'multi-scan' 
_exptl_absorpt_correction_T_min   0.2373 
_exptl_absorpt_correction_T_max   0.7516 
_exptl_absorpt_process_details    '(<i>SADABS</i>; Bruker, 2009)'  
 
_exptl_special_details 
; 
 ? 
; 
 
_diffrn_ambient_temperature       297(2) 
_diffrn_radiation_wavelength      0.71073 
_diffrn_radiation_type            MoK\a 
_diffrn_radiation_source          'fine-focus sealed tube' 
_diffrn_radiation_monochromator   graphite 
_diffrn_measurement_device_type   'Bruker APEX Duo CCD area detector'
_diffrn_measurement_method        '\f and \w scans'  
_diffrn_detector_area_resol_mean  ? 
_diffrn_standards_number          0 
_diffrn_standards_interval_count  . 
_diffrn_standards_interval_time   . 
_diffrn_standards_decay_%         ? 
_diffrn_reflns_number             16116 
_diffrn_reflns_av_R_equivalents   0.0493 
_diffrn_reflns_av_sigmaI/netI     0.0485 
_diffrn_reflns_limit_h_min        -10 
_diffrn_reflns_limit_h_max        9 
_diffrn_reflns_limit_k_min        -12 
_diffrn_reflns_limit_k_max        16 
_diffrn_reflns_limit_l_min        -42 
_diffrn_reflns_limit_l_max        31 
_diffrn_reflns_theta_min          1.36 
_diffrn_reflns_theta_max          29.97 
_reflns_number_total              3816 
_reflns_number_gt                 1935 
_reflns_threshold_expression      'I > 2\s(I)' 
 
_computing_data_collection        'APEX2 (Bruker, 2009)' 
_computing_cell_refinement        'SAINT (Bruker, 2009)' 
_computing_data_reduction          SAINT
_computing_structure_solution     'SHELXTL (Sheldrick, 2008)' 
_computing_structure_refinement    SHELXTL 
_computing_molecular_graphics      SHELXTL 
_computing_publication_material
;
SHELXTL and PLATON (Spek, 2009)
;
 
_refine_special_details 
; 
 Refinement of F^2^ against ALL reflections.  The weighted R-factor wR and 
 goodness of fit S are based on F^2^, conventional R-factors R are based 
 on F, with F set to zero for negative F^2^. The threshold expression of 
 F^2^ > 2sigma(F^2^) is used only for calculating R-factors(gt) etc. and is 
 not relevant to the choice of reflections for refinement.  R-factors based 
 on F^2^ are statistically about twice as large as those based on F, and R- 
 factors based on ALL data will be even larger. 
; 

_iucr_refine_instructions_details
;
TITL mo_ch14_0m in Pbca (RT)
CELL 0.71073   7.4759  11.7245  30.0094  90.000  90.000  90.000
ZERR    8.00   0.0021   0.0032   0.0081   0.000   0.000   0.000
LATT  1
SYMM 0.5-X, -Y, 0.5+Z
SYMM -X, 0.5+Y, 0.5-Z
SYMM 0.5+X, 0.5-Y, -Z
SFAC C H O F S CL BR
UNIT 104 56 8 8 8 8 8
TEMP 24.000
SIZE 0.087 0.283 0.58
L.S. 10
BOND $H
FMAP 2 1 60
PLAN 20
ACTA
CONF
WGHT      0.0590      0.4999 
FVAR       0.30882
BR1   7    1.075093    0.810480    0.172154    11.00000    0.10604    0.06581 =
         0.08583   -0.01361   -0.00703   -0.00803
CL1   6    0.547014    0.397128   -0.136245    11.00000    0.07575    0.06786 =
         0.07754   -0.01742   -0.00675    0.00394
S1    5    0.612788    0.314589   -0.044209    11.00000    0.07241    0.03922 =
         0.08912   -0.00854   -0.00920   -0.00402
F1    4    1.132319    0.663780    0.253597    11.00000    0.14694    0.12369 =
         0.06792   -0.01426   -0.02823    0.01409
O1    3    0.679178    0.261863    0.049754    11.00000    0.08678    0.04520 =
         0.09198    0.00322   -0.00117   -0.00870
C1    1    0.624478    0.420280   -0.083138    11.00000    0.05249    0.04969 =
         0.07088   -0.00889    0.00187    0.00631
C2    1    0.693581    0.519383   -0.066959    11.00000    0.07572    0.04758 =
         0.07738   -0.00246    0.00335   -0.01216
AFIX  43
H2A   2    0.708684    0.585423   -0.083708    11.00000   -1.20000
AFIX   0
C3    1    0.739041    0.509165   -0.021847    11.00000    0.06458    0.04373 =
         0.07311   -0.00542   -0.00257   -0.00918
AFIX  43
H3A   2    0.788012    0.568469   -0.005272    11.00000   -1.20000
AFIX   0
C4    1    0.704415    0.403487   -0.004536    11.00000    0.04346    0.04121 =
         0.07370   -0.00874   -0.00083    0.00109
C5    1    0.725352    0.360218    0.040695    11.00000    0.04634    0.04481 =
         0.08361   -0.00058    0.00422    0.00563
C6    1    0.802868    0.438389    0.073999    11.00000    0.05689    0.04377 =
         0.07155    0.00100    0.00413   -0.00046
AFIX  43
H6A   2    0.825197    0.513624    0.065908    11.00000   -1.20000
AFIX   0
C7    1    0.841666    0.405158    0.114941    11.00000    0.05429    0.04529 =
         0.07556    0.00544    0.00833    0.00259
AFIX  43
H7A   2    0.818580    0.329194    0.121760    11.00000   -1.20000
AFIX   0
C8    1    0.917028    0.475008    0.150694    11.00000    0.05403    0.05845 =
         0.05932    0.00699    0.00880    0.00815
C9    1    0.952257    0.591031    0.145334    11.00000    0.05403    0.05555 =
         0.05127    0.00472    0.00260    0.00519
AFIX  43
H9A   2    0.927441    0.626225    0.118258    11.00000   -1.20000
AFIX   0
C10   1    1.023509    0.653931    0.179814    11.00000    0.05753    0.06215 =
         0.05630    0.00161    0.00417    0.00649
C11   1    1.061051    0.601981    0.219973    11.00000    0.08839    0.09463 =
         0.04858   -0.01200   -0.00440    0.01597
C12   1    1.030883    0.488209    0.226133    11.00000    0.10874    0.09636 =
         0.06050    0.02064   -0.00135    0.01863
AFIX  43
H12A  2    1.059568    0.453939    0.253153    11.00000   -1.20000
AFIX   0
C13   1    0.957217    0.423897    0.191899    11.00000    0.08849    0.07098 =
         0.06887    0.01886    0.00943    0.01088
AFIX  43
H13A  2    0.934351    0.346719    0.196227    11.00000   -1.20000
 
HKLF 4
 
REM  mo_ch14_0m in Pbca (RT)
REM R1 =  0.0444 for   1935 Fo > 4sig(Fo)  and  0.1080 for all   3816 data
REM    163 parameters refined using      0 restraints
 
END  
     
WGHT      0.0590      0.4999 
REM Highest difference peak  0.350,  deepest hole -0.449,  1-sigma level  0.056
Q1    1   1.1399  0.7855  0.1975  11.00000  0.05    0.35
Q2    1   1.1831  0.7797  0.1865  11.00000  0.05    0.31
Q3    1   1.0003  0.7757  0.1984  11.00000  0.05    0.28
Q4    1   0.9439  0.7941  0.1848  11.00000  0.05    0.22
Q5    1   0.5890  0.4025 -0.0625  11.00000  0.05    0.22
Q6    1   0.6734  0.5287 -0.0392  11.00000  0.05    0.19
Q7    1   0.5685  0.3118  0.0395  11.00000  0.05    0.18
Q8    1   0.4640  0.3196 -0.0996  11.00000  0.05    0.18
Q9    1   0.8977  0.4591  0.1787  11.00000  0.05    0.18
Q10   1   0.9528  0.4650  0.1587  11.00000  0.05    0.18
Q11   1   1.1205  0.8070  0.1350  11.00000  0.05    0.18
Q12   1   0.5915  0.4210 -0.0975  11.00000  0.05    0.18
Q13   1   0.6879  0.4641 -0.0784  11.00000  0.05    0.16
Q14   1   0.6300  0.3919 -0.1157  11.00000  0.05    0.16
Q15   1   1.0705  0.8634  0.1842  11.00000  0.05    0.16
Q16   1   0.6629  0.3827 -0.0186  11.00000  0.05    0.16
Q17   1   0.6840  0.4102  0.0156  11.00000  0.05    0.15
Q18   1   0.6574  0.3182 -0.0199  11.00000  0.05    0.15
Q19   1   1.2103  0.8192  0.1389  11.00000  0.05    0.15
Q20   1   0.9793  0.6194  0.1199  11.00000  0.05    0.15
;
 
_refine_ls_structure_factor_coef  Fsqd  
_refine_ls_matrix_type            full 
_refine_ls_weighting_scheme       calc  
_refine_ls_weighting_details 
 'calc w=1/[\s^2^(Fo^2^)+(0.0590P)^2^+0.4999P] where P=(Fo^2^+2Fc^2^)/3' 
_atom_sites_solution_primary      direct 
_atom_sites_solution_secondary    difmap 
_atom_sites_solution_hydrogens    geom 
_refine_ls_hydrogen_treatment     constr 
_refine_ls_extinction_method      none 
_refine_ls_extinction_coef        ? 
_refine_ls_number_reflns          3816 
_refine_ls_number_parameters      163 
_refine_ls_number_restraints      0 
_refine_ls_R_factor_all           0.1080 
_refine_ls_R_factor_gt            0.0444 
_refine_ls_wR_factor_ref          0.1356 
_refine_ls_wR_factor_gt           0.1097 
_refine_ls_goodness_of_fit_ref    1.010 
_refine_ls_restrained_S_all       1.010 
_refine_ls_shift/su_max           0.001 
_refine_ls_shift/su_mean          0.000 
 
loop_ 
 _atom_site_label 
 _atom_site_type_symbol 
 _atom_site_fract_x 
 _atom_site_fract_y 
 _atom_site_fract_z 
 _atom_site_U_iso_or_equiv 
 _atom_site_adp_type 
 _atom_site_occupancy 
 _atom_site_symmetry_multiplicity 
 _atom_site_calc_flag 
 _atom_site_refinement_flags 
 _atom_site_disorder_assembly 
 _atom_site_disorder_group 
Br1 Br 1.07509(6) 0.81048(3) 0.172154(15) 0.0859(2) Uani 1 1 d . . . 
Cl1 Cl 0.54701(12) 0.39713(8) -0.13624(3) 0.0737(3) Uani 1 1 d . . . 
S1 S 0.61279(12) 0.31459(6) -0.04421(3) 0.0669(3) Uani 1 1 d . . . 
F1 F 1.1323(4) 0.6638(2) 0.25360(8) 0.1129(8) Uani 1 1 d . . . 
O1 O 0.6792(3) 0.26186(18) 0.04975(8) 0.0747(6) Uani 1 1 d . . . 
C1 C 0.6245(4) 0.4203(2) -0.08314(11) 0.0577(8) Uani 1 1 d . . . 
C2 C 0.6936(5) 0.5194(3) -0.06696(12) 0.0669(9) Uani 1 1 d . . . 
H2A H 0.7087 0.5854 -0.0837 0.080 Uiso 1 1 calc R . . 
C3 C 0.7390(4) 0.5092(2) -0.02185(11) 0.0605(8) Uani 1 1 d . . . 
H3A H 0.7880 0.5685 -0.0053 0.073 Uiso 1 1 calc R . . 
C4 C 0.7044(4) 0.4035(2) -0.00454(11) 0.0528(7) Uani 1 1 d . . . 
C5 C 0.7254(4) 0.3602(3) 0.04069(11) 0.0583(8) Uani 1 1 d . . . 
C6 C 0.8029(4) 0.4384(2) 0.07400(11) 0.0574(8) Uani 1 1 d . . . 
H6A H 0.8252 0.5136 0.0659 0.069 Uiso 1 1 calc R . . 
C7 C 0.8417(4) 0.4052(3) 0.11494(11) 0.0584(8) Uani 1 1 d . . . 
H7A H 0.8186 0.3292 0.1218 0.070 Uiso 1 1 calc R . . 
C8 C 0.9170(4) 0.4750(3) 0.15069(11) 0.0573(8) Uani 1 1 d . . . 
C9 C 0.9523(4) 0.5910(3) 0.14533(10) 0.0536(7) Uani 1 1 d . . . 
H9A H 0.9274 0.6262 0.1183 0.064 Uiso 1 1 calc R . . 
C10 C 1.0235(4) 0.6539(3) 0.17981(11) 0.0587(8) Uani 1 1 d . . . 
C11 C 1.0611(5) 0.6020(4) 0.21997(11) 0.0772(11) Uani 1 1 d . . . 
C12 C 1.0309(6) 0.4882(4) 0.22613(14) 0.0885(12) Uani 1 1 d . . . 
H12A H 1.0596 0.4539 0.2532 0.106 Uiso 1 1 calc R . . 
C13 C 0.9572(5) 0.4239(3) 0.19190(13) 0.0761(10) Uani 1 1 d . . . 
H13A H 0.9344 0.3467 0.1962 0.091 Uiso 1 1 calc R . . 
 
loop_ 
 _atom_site_aniso_label 
 _atom_site_aniso_U_11 
 _atom_site_aniso_U_22 
 _atom_site_aniso_U_33 
 _atom_site_aniso_U_23 
 _atom_site_aniso_U_13 
 _atom_site_aniso_U_12 
Br1 0.1060(4) 0.0658(3) 0.0858(3) -0.01361(19) -0.0070(2) -0.0080(2) 
Cl1 0.0757(6) 0.0679(5) 0.0775(6) -0.0174(4) -0.0068(4) 0.0039(4) 
S1 0.0724(6) 0.0392(4) 0.0891(7) -0.0085(4) -0.0092(5) -0.0040(4) 
F1 0.147(2) 0.124(2) 0.0679(16) -0.0143(14) -0.0282(15) 0.0141(17) 
O1 0.0868(16) 0.0452(12) 0.0920(17) 0.0032(12) -0.0012(13) -0.0087(12) 
C1 0.0525(17) 0.0497(16) 0.071(2) -0.0089(14) 0.0019(15) 0.0063(14) 
C2 0.076(2) 0.0476(16) 0.077(3) -0.0025(16) 0.0034(18) -0.0122(16) 
C3 0.0646(19) 0.0437(15) 0.073(2) -0.0054(15) -0.0026(16) -0.0092(15) 
C4 0.0435(15) 0.0412(14) 0.074(2) -0.0087(14) -0.0008(14) 0.0011(12) 
C5 0.0463(16) 0.0448(15) 0.084(2) -0.0006(16) 0.0042(15) 0.0056(14) 
C6 0.0569(17) 0.0438(15) 0.072(2) 0.0010(15) 0.0041(15) -0.0005(14) 
C7 0.0543(17) 0.0453(16) 0.076(2) 0.0054(15) 0.0083(16) 0.0026(15) 
C8 0.0540(18) 0.0585(18) 0.0593(19) 0.0070(15) 0.0088(14) 0.0082(15) 
C9 0.0540(17) 0.0556(17) 0.0513(18) 0.0047(14) 0.0026(14) 0.0052(14) 
C10 0.0575(19) 0.0622(18) 0.056(2) 0.0016(15) 0.0042(15) 0.0065(16) 
C11 0.088(3) 0.095(3) 0.049(2) -0.0120(19) -0.0044(18) 0.016(2) 
C12 0.109(3) 0.096(3) 0.060(2) 0.021(2) -0.001(2) 0.019(3) 
C13 0.088(3) 0.071(2) 0.069(2) 0.0189(19) 0.009(2) 0.011(2) 
 
_geom_special_details 
; 
 All esds (except the esd in the dihedral angle between two l.s. planes) 
 are estimated using the full covariance matrix.  The cell esds are taken 
 into account individually in the estimation of esds in distances, angles 
 and torsion angles; correlations between esds in cell parameters are only 
 used when they are defined by crystal symmetry.  An approximate (isotropic) 
 treatment of cell esds is used for estimating esds involving l.s. planes. 
; 
 
loop_ 
 _geom_bond_atom_site_label_1 
 _geom_bond_atom_site_label_2 
 _geom_bond_distance 
 _geom_bond_site_symmetry_2 
 _geom_bond_publ_flag 
Br1 C10 1.890(4) . ? 
Cl1 C1 1.717(3) . ? 
S1 C1 1.705(3) . ? 
S1 C4 1.724(3) . ? 
F1 C11 1.352(4) . ? 
O1 C5 1.234(4) . ? 
C1 C2 1.361(4) . ? 
C2 C3 1.401(5) . ? 
C2 H2A 0.9300 . ? 
C3 C4 1.368(4) . ? 
C3 H3A 0.9300 . ? 
C4 C5 1.457(5) . ? 
C5 C6 1.475(4) . ? 
C6 C7 1.321(4) . ? 
C6 H6A 0.9300 . ? 
C7 C8 1.463(5) . ? 
C7 H7A 0.9300 . ? 
C8 C9 1.395(4) . ? 
C8 C13 1.407(5) . ? 
C9 C10 1.378(5) . ? 
C9 H9A 0.9300 . ? 
C10 C11 1.379(5) . ? 
C11 C12 1.365(6) . ? 
C12 C13 1.388(6) . ? 
C12 H12A 0.9300 . ? 
C13 H13A 0.9300 . ? 
 
loop_ 
 _geom_angle_atom_site_label_1 
 _geom_angle_atom_site_label_2 
 _geom_angle_atom_site_label_3 
 _geom_angle 
 _geom_angle_site_symmetry_1 
 _geom_angle_site_symmetry_3 
 _geom_angle_publ_flag 
C1 S1 C4 90.77(15) . . ? 
C2 C1 S1 113.3(3) . . ? 
C2 C1 Cl1 126.4(3) . . ? 
S1 C1 Cl1 120.24(18) . . ? 
C1 C2 C3 111.3(3) . . ? 
C1 C2 H2A 124.3 . . ? 
C3 C2 H2A 124.3 . . ? 
C4 C3 C2 113.5(3) . . ? 
C4 C3 H3A 123.3 . . ? 
C2 C3 H3A 123.3 . . ? 
C3 C4 C5 130.4(3) . . ? 
C3 C4 S1 111.1(2) . . ? 
C5 C4 S1 118.4(2) . . ? 
O1 C5 C4 120.0(3) . . ? 
O1 C5 C6 122.8(3) . . ? 
C4 C5 C6 117.2(3) . . ? 
C7 C6 C5 122.2(3) . . ? 
C7 C6 H6A 118.9 . . ? 
C5 C6 H6A 118.9 . . ? 
C6 C7 C8 127.0(3) . . ? 
C6 C7 H7A 116.5 . . ? 
C8 C7 H7A 116.5 . . ? 
C9 C8 C13 118.5(3) . . ? 
C9 C8 C7 122.3(3) . . ? 
C13 C8 C7 119.3(3) . . ? 
C10 C9 C8 120.6(3) . . ? 
C10 C9 H9A 119.7 . . ? 
C8 C9 H9A 119.7 . . ? 
C9 C10 C11 119.9(3) . . ? 
C9 C10 Br1 120.5(2) . . ? 
C11 C10 Br1 119.6(3) . . ? 
F1 C11 C12 119.2(4) . . ? 
F1 C11 C10 119.7(4) . . ? 
C12 C11 C10 121.1(4) . . ? 
C11 C12 C13 119.7(4) . . ? 
C11 C12 H12A 120.1 . . ? 
C13 C12 H12A 120.1 . . ? 
C12 C13 C8 120.3(4) . . ? 
C12 C13 H13A 119.9 . . ? 
C8 C13 H13A 119.9 . . ? 
 
loop_ 
 _geom_torsion_atom_site_label_1 
 _geom_torsion_atom_site_label_2 
 _geom_torsion_atom_site_label_3 
 _geom_torsion_atom_site_label_4 
 _geom_torsion 
 _geom_torsion_site_symmetry_1 
 _geom_torsion_site_symmetry_2 
 _geom_torsion_site_symmetry_3 
 _geom_torsion_site_symmetry_4 
 _geom_torsion_publ_flag 
C4 S1 C1 C2 -0.4(3) . . . . ? 
C4 S1 C1 Cl1 -178.6(2) . . . . ? 
S1 C1 C2 C3 0.3(4) . . . . ? 
Cl1 C1 C2 C3 178.3(2) . . . . ? 
C1 C2 C3 C4 0.1(4) . . . . ? 
C2 C3 C4 C5 -177.3(3) . . . . ? 
C2 C3 C4 S1 -0.4(4) . . . . ? 
C1 S1 C4 C3 0.5(2) . . . . ? 
C1 S1 C4 C5 177.7(2) . . . . ? 
C3 C4 C5 O1 177.2(3) . . . . ? 
S1 C4 C5 O1 0.5(4) . . . . ? 
C3 C4 C5 C6 -2.9(5) . . . . ? 
S1 C4 C5 C6 -179.6(2) . . . . ? 
O1 C5 C6 C7 5.7(5) . . . . ? 
C4 C5 C6 C7 -174.2(3) . . . . ? 
C5 C6 C7 C8 -179.4(3) . . . . ? 
C6 C7 C8 C9 2.2(5) . . . . ? 
C6 C7 C8 C13 -177.2(3) . . . . ? 
C13 C8 C9 C10 -0.5(4) . . . . ? 
C7 C8 C9 C10 -179.9(3) . . . . ? 
C8 C9 C10 C11 0.2(5) . . . . ? 
C8 C9 C10 Br1 178.9(2) . . . . ? 
C9 C10 C11 F1 179.5(3) . . . . ? 
Br1 C10 C11 F1 0.8(5) . . . . ? 
C9 C10 C11 C12 0.8(6) . . . . ? 
Br1 C10 C11 C12 -177.8(3) . . . . ? 
F1 C11 C12 C13 179.8(4) . . . . ? 
C10 C11 C12 C13 -1.6(6) . . . . ? 
C11 C12 C13 C8 1.3(6) . . . . ? 
C9 C8 C13 C12 -0.3(5) . . . . ? 
C7 C8 C13 C12 179.2(3) . . . . ? 
 
_diffrn_measured_fraction_theta_max    0.995 
_diffrn_reflns_theta_full              29.97 
_diffrn_measured_fraction_theta_full   0.995 
_refine_diff_density_max    0.350 
_refine_diff_density_min   -0.449 
_refine_diff_density_rms    0.056 
#==============================================================================

data_3f
 
_audit_creation_method            SHELXL-97 
_chemical_name_systematic 
; 
 ? 
; 
_chemical_name_common             ? 
_chemical_melting_point           ? 
_chemical_formula_moiety          'C13 H8 Cl2 O S'
_chemical_formula_sum 
 'C13 H8 Cl2 O S' 
_chemical_formula_weight          283.15 
 
loop_ 
 _atom_type_symbol 
 _atom_type_description 
 _atom_type_scat_dispersion_real 
 _atom_type_scat_dispersion_imag 
 _atom_type_scat_source 
 'C'  'C'   0.0033   0.0016 
 'International Tables Vol C Tables 4.2.6.8 and 6.1.1.4' 
 'H'  'H'   0.0000   0.0000 
 'International Tables Vol C Tables 4.2.6.8 and 6.1.1.4' 
 'O'  'O'   0.0106   0.0060 
 'International Tables Vol C Tables 4.2.6.8 and 6.1.1.4' 
 'S'  'S'   0.1246   0.1234 
 'International Tables Vol C Tables 4.2.6.8 and 6.1.1.4' 
 'Cl'  'Cl'   0.1484   0.1585 
 'International Tables Vol C Tables 4.2.6.8 and 6.1.1.4' 
 
_symmetry_cell_setting                 Monoclinic
_symmetry_space_group_name_Hall      '-P 2ybc'
_symmetry_space_group_name_H-M       'P 21/c'
 
loop_ 
 _symmetry_equiv_pos_as_xyz 
 'x, y, z' 
 '-x, y+1/2, -z+1/2' 
 '-x, -y, -z' 
 'x, -y-1/2, z-1/2' 
 
_cell_length_a                    14.5437(10) 
_cell_length_b                    7.5227(6) 
_cell_length_c                    11.7604(9) 
_cell_angle_alpha                 90.00 
_cell_angle_beta                  104.7210(10) 
_cell_angle_gamma                 90.00 
_cell_volume                      1244.44(16) 
_cell_formula_units_Z             4 
_cell_measurement_temperature     297(2)
_cell_measurement_reflns_used      4707
_cell_measurement_theta_min        2.90
_cell_measurement_theta_max       29.01
_exptl_crystal_description       'block'
_exptl_crystal_colour            'colourless'
_exptl_crystal_size_max           0.50 
_exptl_crystal_size_mid           0.23 
_exptl_crystal_size_min           0.08 
_exptl_crystal_density_meas       ? 
_exptl_crystal_density_diffrn     1.511 
_exptl_crystal_density_method     'not measured' 
_exptl_crystal_F_000              576 
_exptl_absorpt_coefficient_mu     0.667 
_exptl_absorpt_correction_type    'multi-scan'
_exptl_absorpt_correction_T_min   0.7332 
_exptl_absorpt_correction_T_max   0.9461 
_exptl_absorpt_process_details    '(<i>SADABS</i>; Bruker, 2009)' 
 
_exptl_special_details 
; 
 ? 
; 
 
_diffrn_ambient_temperature       297(2) 
_diffrn_radiation_wavelength      0.71073 
_diffrn_radiation_type            MoK\a 
_diffrn_radiation_source          'fine-focus sealed tube' 
_diffrn_radiation_monochromator   graphite 
_diffrn_measurement_device_type   'Bruker APEX Duo CCD area detector'
_diffrn_measurement_method        '\f and \w scans'  
_diffrn_detector_area_resol_mean  ? 
_diffrn_standards_number          0 
_diffrn_standards_interval_count  . 
_diffrn_standards_interval_time   . 
_diffrn_standards_decay_%         ? 
_diffrn_reflns_number             11650 
_diffrn_reflns_av_R_equivalents   0.0209 
_diffrn_reflns_av_sigmaI/netI     0.0202 
_diffrn_reflns_limit_h_min        -18 
_diffrn_reflns_limit_h_max        18 
_diffrn_reflns_limit_k_min        -9 
_diffrn_reflns_limit_k_max        9 
_diffrn_reflns_limit_l_min        -15 
_diffrn_reflns_limit_l_max        15 
_diffrn_reflns_theta_min          1.45 
_diffrn_reflns_theta_max          27.49 
_reflns_number_total              2829 
_reflns_number_gt                 2312 
_reflns_threshold_expression      'I > 2\s(I)' 
 
_computing_data_collection        'APEX2 (Bruker, 2009)' 
_computing_cell_refinement        'SAINT (Bruker, 2009)' 
_computing_data_reduction          SAINT
_computing_structure_solution     'SHELXTL (Sheldrick, 2008)' 
_computing_structure_refinement    SHELXTL 
_computing_molecular_graphics      SHELXTL 
_computing_publication_material
;
SHELXTL and PLATON (Spek, 2009)
;
 
_refine_special_details 
; 
 Refinement of F^2^ against ALL reflections.  The weighted R-factor wR and 
 goodness of fit S are based on F^2^, conventional R-factors R are based 
 on F, with F set to zero for negative F^2^. The threshold expression of 
 F^2^ > 2sigma(F^2^) is used only for calculating R-factors(gt) etc. and is 
 not relevant to the choice of reflections for refinement.  R-factors based 
 on F^2^ are statistically about twice as large as those based on F, and R- 
 factors based on ALL data will be even larger. 
; 

_iucr_refine_instructions_details
;
TITL mo_ch22b_0m in P2(1)/c (RT)
CELL 0.71073  14.5437   7.5227  11.7604  90.000 104.721  90.000
ZERR    4.00   0.0010   0.0006   0.0009   0.000   0.001   0.000
LATT  1
SYMM -X, 0.5+Y, 0.5-Z
SFAC C H O S CL
UNIT 52 32 4 4 8
TEMP 24.000
SIZE 0.084 0.234 0.496
L.S. 10
BOND $H
FMAP 2 2 60
PLAN 20
OMIT -4 55
OMIT 0 0 4
OMIT -10 1 5
OMIT 1 1 8
OMIT 1 0 8
OMIT 0 0 2
OMIT 2 0 8
OMIT -2 5 3
OMIT -2 5 4
ACTA
CONF
WGHT      0.0573      0.2014 
FVAR       0.60379
CL1   5    1.285829    0.452821    0.698037    11.00000    0.04261    0.07306 =
         0.05565   -0.00267    0.00330   -0.00545
CL2   5    0.631329   -0.025687    0.060485    11.00000    0.06374    0.10309 =
         0.04922   -0.01428    0.01105   -0.00790
S1    4    1.089415    0.369782    0.711479    11.00000    0.05055    0.07188 =
         0.03329   -0.00505    0.00907   -0.00974
O1    3    0.888974    0.288588    0.694333    11.00000    0.05565    0.08024 =
         0.04425   -0.00715    0.01948   -0.00782
C1    1    1.173239    0.377870    0.632991    11.00000    0.04061    0.04649 =
         0.04325    0.00218    0.00722    0.00106
C2    1    1.141090    0.322525    0.520252    11.00000    0.04653    0.06472 =
         0.04562   -0.00993    0.01676   -0.00155
AFIX  43
H2A   2    1.177639    0.319158    0.465876    11.00000   -1.20000
AFIX   0
C3    1    1.044573    0.270517    0.496137    11.00000    0.04642    0.05799 =
         0.03863   -0.00844    0.00841   -0.00217
AFIX  43
H3A   2    1.010332    0.228774    0.423222    11.00000   -1.20000
AFIX   0
C4    1    1.006702    0.287708    0.590561    11.00000    0.04356    0.04430 =
         0.03521   -0.00072    0.00673   -0.00029
C5    1    0.910107    0.256089    0.601377    11.00000    0.04631    0.04604 =
         0.03815    0.00287    0.01108   -0.00016
C6    1    0.841341    0.182519    0.497809    11.00000    0.04362    0.05428 =
         0.03976    0.00064    0.00995   -0.00156
AFIX  43
H6A   2    0.858171    0.175104    0.426771    11.00000   -1.20000
AFIX   0
C7    1    0.756128    0.126625    0.503217    11.00000    0.04708    0.05209 =
         0.04220    0.00185    0.01350   -0.00082
AFIX  43
H7A   2    0.741435    0.137271    0.575400    11.00000   -1.20000
AFIX   0
C8    1    0.682756    0.049651    0.406543    11.00000    0.04017    0.04458 =
         0.04900    0.00296    0.01124    0.00075
C9    1    0.690205    0.051085    0.290697    11.00000    0.03811    0.04785 =
         0.04949   -0.00004    0.01152   -0.00215
AFIX  43
H9A   2    0.742480    0.103427    0.272152    11.00000   -1.20000
AFIX   0
C10   1    0.619307   -0.025876    0.203569    11.00000    0.04364    0.04999 =
         0.04944   -0.00295    0.00916    0.00401
C11   1    0.540543   -0.105238    0.228157    11.00000    0.03939    0.05383 =
         0.06687   -0.00685    0.00528   -0.00310
AFIX  43
H11A  2    0.493500   -0.156426    0.168479    11.00000   -1.20000
AFIX   0
C12   1    0.533289   -0.106857    0.342122    11.00000    0.04115    0.06252 =
         0.07362    0.00318    0.01694   -0.00940
AFIX  43
H12A  2    0.480891   -0.160093    0.359805    11.00000   -1.20000
AFIX   0
C13   1    0.602973   -0.030246    0.431274    11.00000    0.04601    0.06154 =
         0.05689    0.00449    0.01968   -0.00504
AFIX  43
H13A  2    0.596773   -0.031841    0.508049    11.00000   -1.20000
 
HKLF 4 1 0 0 1 0 -1 0 1 0 0
 
REM  mo_ch22b_0m in P2(1)/c (RT)
REM R1 =  0.0299 for   2312 Fo > 4sig(Fo)  and  0.0385 for all   2829 data
REM    154 parameters refined using      0 restraints
 
END  
     
WGHT      0.0573      0.2014 
REM Highest difference peak  0.212,  deepest hole -0.217,  1-sigma level  0.043
Q1    1   0.8741  0.2177  0.5441  11.00000  0.05    0.21
Q2    1   0.6368 -0.1325  0.1023  11.00000  0.05    0.20
Q3    1   1.0202  0.3168  0.5415  11.00000  0.05    0.19
Q4    1   0.9636  0.2484  0.6011  11.00000  0.05    0.19
Q5    1   1.0286  0.2458  0.5565  11.00000  0.05    0.18
Q6    1   0.6464  0.0105  0.4254  11.00000  0.05    0.18
Q7    1   0.7162  0.0696  0.4463  11.00000  0.05    0.18
Q8    1   0.6545  0.0054  0.2473  11.00000  0.05    0.18
Q9    1   0.8066  0.1236  0.4952  11.00000  0.05    0.17
Q10   1   1.0351  0.3153  0.6409  11.00000  0.05    0.17
Q11   1   0.5719 -0.0250  0.2198  11.00000  0.05    0.17
Q12   1   0.5621 -0.0457  0.3812  11.00000  0.05    0.17
Q13   1   1.1683  0.3086  0.5881  11.00000  0.05    0.15
Q14   1   0.6226 -0.0252  0.1434  11.00000  0.05    0.15
Q15   1   1.1419  0.3594  0.6775  11.00000  0.05    0.15
Q16   1   1.2795  0.4092  0.7650  11.00000  0.05    0.14
Q17   1   0.9086  0.2281  0.6495  11.00000  0.05    0.14
Q18   1   1.1045  0.2964  0.4994  11.00000  0.05    0.14
Q19   1   0.4862 -0.2345  0.1792  11.00000  0.05    0.13
Q20   1   0.4884 -0.2430  0.3374  11.00000  0.05    0.13
;
 
_refine_ls_structure_factor_coef  Fsqd  
_refine_ls_matrix_type            full 
_refine_ls_weighting_scheme       calc  
_refine_ls_weighting_details 
 'calc w=1/[\s^2^(Fo^2^)+(0.0573P)^2^+0.2014P] where P=(Fo^2^+2Fc^2^)/3' 
_atom_sites_solution_primary      direct 
_atom_sites_solution_secondary    difmap 
_atom_sites_solution_hydrogens    geom 
_refine_ls_hydrogen_treatment     constr 
_refine_ls_extinction_method      none 
_refine_ls_extinction_coef        ? 
_refine_ls_number_reflns          2829 
_refine_ls_number_parameters      154 
_refine_ls_number_restraints      0 
_refine_ls_R_factor_all           0.0385 
_refine_ls_R_factor_gt            0.0299 
_refine_ls_wR_factor_ref          0.1010 
_refine_ls_wR_factor_gt           0.0911 
_refine_ls_goodness_of_fit_ref    1.042 
_refine_ls_restrained_S_all       1.042 
_refine_ls_shift/su_max           0.001 
_refine_ls_shift/su_mean          0.000 
 
loop_ 
 _atom_site_label 
 _atom_site_type_symbol 
 _atom_site_fract_x 
 _atom_site_fract_y 
 _atom_site_fract_z 
 _atom_site_U_iso_or_equiv 
 _atom_site_adp_type 
 _atom_site_occupancy 
 _atom_site_symmetry_multiplicity 
 _atom_site_calc_flag 
 _atom_site_refinement_flags 
 _atom_site_disorder_assembly 
 _atom_site_disorder_group 
Cl1 Cl 1.28583(3) 0.45282(7) 0.69804(4) 0.05877(16) Uani 1 1 d . . . 
Cl2 Cl 0.63133(4) -0.02569(9) 0.06048(4) 0.07262(18) Uani 1 1 d . . . 
S1 S 1.08941(3) 0.36978(6) 0.71148(4) 0.05219(15) Uani 1 1 d . . . 
O1 O 0.88897(9) 0.28859(19) 0.69433(11) 0.0588(3) Uani 1 1 d . . . 
C1 C 1.17324(11) 0.3779(2) 0.63299(15) 0.0441(4) Uani 1 1 d . . . 
C2 C 1.14109(12) 0.3225(2) 0.52025(16) 0.0514(4) Uani 1 1 d . . . 
H2A H 1.1776 0.3192 0.4659 0.062 Uiso 1 1 calc R . . 
C3 C 1.04457(11) 0.2705(2) 0.49614(15) 0.0481(4) Uani 1 1 d . . . 
H3A H 1.0103 0.2288 0.4232 0.058 Uiso 1 1 calc R . . 
C4 C 1.00670(11) 0.2877(2) 0.59056(14) 0.0416(3) Uani 1 1 d . . . 
C5 C 0.91011(11) 0.2561(2) 0.60138(14) 0.0434(3) Uani 1 1 d . . . 
C6 C 0.84134(11) 0.1825(2) 0.49781(15) 0.0460(4) Uani 1 1 d . . . 
H6A H 0.8582 0.1751 0.4268 0.055 Uiso 1 1 calc R . . 
C7 C 0.75613(12) 0.1266(2) 0.50322(15) 0.0467(4) Uani 1 1 d . . . 
H7A H 0.7414 0.1373 0.5754 0.056 Uiso 1 1 calc R . . 
C8 C 0.68276(11) 0.0497(2) 0.40654(15) 0.0446(4) Uani 1 1 d . . . 
C9 C 0.69020(11) 0.0511(2) 0.29070(15) 0.0451(4) Uani 1 1 d . . . 
H9A H 0.7425 0.1034 0.2722 0.054 Uiso 1 1 calc R . . 
C10 C 0.61931(11) -0.0259(2) 0.20357(16) 0.0482(4) Uani 1 1 d . . . 
C11 C 0.54054(12) -0.1052(2) 0.22816(18) 0.0549(5) Uani 1 1 d . . . 
H11A H 0.4935 -0.1564 0.1685 0.066 Uiso 1 1 calc R . . 
C12 C 0.53329(13) -0.1069(3) 0.3421(2) 0.0587(5) Uani 1 1 d . . . 
H12A H 0.4809 -0.1601 0.3598 0.070 Uiso 1 1 calc R . . 
C13 C 0.60297(12) -0.0302(2) 0.43127(18) 0.0536(4) Uani 1 1 d . . . 
H13A H 0.5968 -0.0318 0.5080 0.064 Uiso 1 1 calc R . . 
 
loop_ 
 _atom_site_aniso_label 
 _atom_site_aniso_U_11 
 _atom_site_aniso_U_22 
 _atom_site_aniso_U_33 
 _atom_site_aniso_U_23 
 _atom_site_aniso_U_13 
 _atom_site_aniso_U_12 
Cl1 0.0426(2) 0.0731(3) 0.0556(3) -0.0027(2) 0.00330(19) -0.00545(18) 
Cl2 0.0637(3) 0.1031(4) 0.0492(3) -0.0143(3) 0.0111(2) -0.0079(3) 
S1 0.0506(3) 0.0719(3) 0.0333(2) -0.00505(18) 0.00907(18) -0.0097(2) 
O1 0.0557(7) 0.0802(9) 0.0443(7) -0.0071(6) 0.0195(6) -0.0078(6) 
C1 0.0406(8) 0.0465(8) 0.0433(9) 0.0022(6) 0.0072(6) 0.0011(6) 
C2 0.0465(8) 0.0647(10) 0.0456(9) -0.0099(8) 0.0168(7) -0.0016(7) 
C3 0.0464(8) 0.0580(9) 0.0386(8) -0.0084(7) 0.0084(7) -0.0022(7) 
C4 0.0436(8) 0.0443(7) 0.0352(8) -0.0007(6) 0.0067(6) -0.0003(6) 
C5 0.0463(8) 0.0460(8) 0.0381(8) 0.0029(7) 0.0111(7) -0.0002(6) 
C6 0.0436(8) 0.0543(8) 0.0398(8) 0.0006(7) 0.0100(7) -0.0016(7) 
C7 0.0471(8) 0.0521(8) 0.0422(9) 0.0018(7) 0.0135(7) -0.0008(7) 
C8 0.0402(8) 0.0446(8) 0.0490(9) 0.0030(7) 0.0112(7) 0.0007(6) 
C9 0.0381(7) 0.0479(8) 0.0495(10) 0.0000(7) 0.0115(7) -0.0021(6) 
C10 0.0436(8) 0.0500(8) 0.0494(10) -0.0030(7) 0.0092(7) 0.0040(7) 
C11 0.0394(8) 0.0538(9) 0.0669(12) -0.0068(8) 0.0053(8) -0.0031(7) 
C12 0.0412(9) 0.0625(10) 0.0736(13) 0.0032(9) 0.0169(9) -0.0094(7) 
C13 0.0460(9) 0.0615(10) 0.0569(11) 0.0045(8) 0.0197(8) -0.0050(8) 
 
_geom_special_details 
; 
 All esds (except the esd in the dihedral angle between two l.s. planes) 
 are estimated using the full covariance matrix.  The cell esds are taken 
 into account individually in the estimation of esds in distances, angles 
 and torsion angles; correlations between esds in cell parameters are only 
 used when they are defined by crystal symmetry.  An approximate (isotropic) 
 treatment of cell esds is used for estimating esds involving l.s. planes. 
; 
 
loop_ 
 _geom_bond_atom_site_label_1 
 _geom_bond_atom_site_label_2 
 _geom_bond_distance 
 _geom_bond_site_symmetry_2 
 _geom_bond_publ_flag 
Cl1 C1 1.7169(16) . ? 
Cl2 C10 1.7354(19) . ? 
S1 C1 1.7070(18) . ? 
S1 C4 1.7266(15) . ? 
O1 C5 1.233(2) . ? 
C1 C2 1.355(2) . ? 
C2 C3 1.415(2) . ? 
C2 H2A 0.9300 . ? 
C3 C4 1.365(2) . ? 
C3 H3A 0.9300 . ? 
C4 C5 1.462(2) . ? 
C5 C6 1.473(2) . ? 
C6 C7 1.325(2) . ? 
C6 H6A 0.9300 . ? 
C7 C8 1.466(2) . ? 
C7 H7A 0.9300 . ? 
C8 C9 1.394(2) . ? 
C8 C13 1.401(2) . ? 
C9 C10 1.383(2) . ? 
C9 H9A 0.9300 . ? 
C10 C11 1.386(3) . ? 
C11 C12 1.371(3) . ? 
C11 H11A 0.9300 . ? 
C12 C13 1.385(3) . ? 
C12 H12A 0.9300 . ? 
C13 H13A 0.9300 . ? 
 
loop_ 
 _geom_angle_atom_site_label_1 
 _geom_angle_atom_site_label_2 
 _geom_angle_atom_site_label_3 
 _geom_angle 
 _geom_angle_site_symmetry_1 
 _geom_angle_site_symmetry_3 
 _geom_angle_publ_flag 
C1 S1 C4 90.64(8) . . ? 
C2 C1 S1 113.70(13) . . ? 
C2 C1 Cl1 126.15(14) . . ? 
S1 C1 Cl1 120.14(10) . . ? 
C1 C2 C3 111.06(16) . . ? 
C1 C2 H2A 124.5 . . ? 
C3 C2 H2A 124.5 . . ? 
C4 C3 C2 113.30(15) . . ? 
C4 C3 H3A 123.4 . . ? 
C2 C3 H3A 123.4 . . ? 
C3 C4 C5 130.58(14) . . ? 
C3 C4 S1 111.29(12) . . ? 
C5 C4 S1 118.06(12) . . ? 
O1 C5 C4 120.43(14) . . ? 
O1 C5 C6 122.53(15) . . ? 
C4 C5 C6 117.04(14) . . ? 
C7 C6 C5 121.74(16) . . ? 
C7 C6 H6A 119.1 . . ? 
C5 C6 H6A 119.1 . . ? 
C6 C7 C8 126.38(17) . . ? 
C6 C7 H7A 116.8 . . ? 
C8 C7 H7A 116.8 . . ? 
C9 C8 C13 118.70(15) . . ? 
C9 C8 C7 122.19(15) . . ? 
C13 C8 C7 119.10(16) . . ? 
C10 C9 C8 119.51(15) . . ? 
C10 C9 H9A 120.2 . . ? 
C8 C9 H9A 120.2 . . ? 
C9 C10 C11 121.74(17) . . ? 
C9 C10 Cl2 118.58(14) . . ? 
C11 C10 Cl2 119.67(14) . . ? 
C12 C11 C10 118.74(16) . . ? 
C12 C11 H11A 120.6 . . ? 
C10 C11 H11A 120.6 . . ? 
C11 C12 C13 120.87(16) . . ? 
C11 C12 H12A 119.6 . . ? 
C13 C12 H12A 119.6 . . ? 
C12 C13 C8 120.43(18) . . ? 
C12 C13 H13A 119.8 . . ? 
C8 C13 H13A 119.8 . . ? 
 
loop_ 
 _geom_torsion_atom_site_label_1 
 _geom_torsion_atom_site_label_2 
 _geom_torsion_atom_site_label_3 
 _geom_torsion_atom_site_label_4 
 _geom_torsion 
 _geom_torsion_site_symmetry_1 
 _geom_torsion_site_symmetry_2 
 _geom_torsion_site_symmetry_3 
 _geom_torsion_site_symmetry_4 
 _geom_torsion_publ_flag 
C4 S1 C1 C2 0.36(14) . . . . ? 
C4 S1 C1 Cl1 179.89(10) . . . . ? 
S1 C1 C2 C3 -0.3(2) . . . . ? 
Cl1 C1 C2 C3 -179.74(13) . . . . ? 
C1 C2 C3 C4 0.0(2) . . . . ? 
C2 C3 C4 C5 177.17(16) . . . . ? 
C2 C3 C4 S1 0.3(2) . . . . ? 
C1 S1 C4 C3 -0.37(13) . . . . ? 
C1 S1 C4 C5 -177.68(13) . . . . ? 
C3 C4 C5 O1 -176.26(17) . . . . ? 
S1 C4 C5 O1 0.4(2) . . . . ? 
C3 C4 C5 C6 4.5(3) . . . . ? 
S1 C4 C5 C6 -178.76(11) . . . . ? 
O1 C5 C6 C7 -8.5(3) . . . . ? 
C4 C5 C6 C7 170.71(15) . . . . ? 
C5 C6 C7 C8 -179.29(15) . . . . ? 
C6 C7 C8 C9 -9.9(3) . . . . ? 
C6 C7 C8 C13 169.28(17) . . . . ? 
C13 C8 C9 C10 -0.1(2) . . . . ? 
C7 C8 C9 C10 179.08(15) . . . . ? 
C8 C9 C10 C11 -0.1(2) . . . . ? 
C8 C9 C10 Cl2 -178.90(12) . . . . ? 
C9 C10 C11 C12 0.0(3) . . . . ? 
Cl2 C10 C11 C12 178.79(14) . . . . ? 
C10 C11 C12 C13 0.2(3) . . . . ? 
C11 C12 C13 C8 -0.4(3) . . . . ? 
C9 C8 C13 C12 0.3(3) . . . . ? 
C7 C8 C13 C12 -178.86(16) . . . . ? 
 
_diffrn_measured_fraction_theta_max    0.993 
_diffrn_reflns_theta_full              27.49 
_diffrn_measured_fraction_theta_full   0.993 
_refine_diff_density_max    0.212 
_refine_diff_density_min   -0.217 
_refine_diff_density_rms    0.043 
#==============================================================================
 
data_3g
 
_audit_creation_method            SHELXL-97 
_chemical_name_systematic 
; 
 ? 
; 
_chemical_name_common             ? 
_chemical_melting_point           ? 
_chemical_formula_moiety          'C13 H7 Br Cl F O S' 
_chemical_formula_sum 
 'C13 H7 Br Cl F O S' 
_chemical_formula_weight          345.61 
 
loop_ 
 _atom_type_symbol 
 _atom_type_description 
 _atom_type_scat_dispersion_real 
 _atom_type_scat_dispersion_imag 
 _atom_type_scat_source 
 'C'  'C'   0.0033   0.0016 
 'International Tables Vol C Tables 4.2.6.8 and 6.1.1.4' 
 'H'  'H'   0.0000   0.0000 
 'International Tables Vol C Tables 4.2.6.8 and 6.1.1.4' 
 'O'  'O'   0.0106   0.0060 
 'International Tables Vol C Tables 4.2.6.8 and 6.1.1.4' 
 'F'  'F'   0.0171   0.0103 
 'International Tables Vol C Tables 4.2.6.8 and 6.1.1.4' 
 'S'  'S'   0.1246   0.1234 
 'International Tables Vol C Tables 4.2.6.8 and 6.1.1.4' 
 'Cl'  'Cl'   0.1484   0.1585 
 'International Tables Vol C Tables 4.2.6.8 and 6.1.1.4' 
 'Br'  'Br'  -0.2901   2.4595 
 'International Tables Vol C Tables 4.2.6.8 and 6.1.1.4' 
 
_symmetry_cell_setting                 Monoclinic
_symmetry_space_group_name_Hall      '-P 2ybc'
_symmetry_space_group_name_H-M       'P 21/c'
 
loop_ 
 _symmetry_equiv_pos_as_xyz 
 'x, y, z' 
 '-x, y+1/2, -z+1/2' 
 '-x, -y, -z' 
 'x, -y-1/2, z-1/2' 
 
_cell_length_a                    3.8704(7) 
_cell_length_b                    31.953(6) 
_cell_length_c                    10.273(2) 
_cell_angle_alpha                 90.00 
_cell_angle_beta                  95.243(3) 
_cell_angle_gamma                 90.00 
_cell_volume                      1265.2(4) 
_cell_formula_units_Z             4 
_cell_measurement_temperature     100.0(1)
_cell_measurement_reflns_used    5747
_cell_measurement_theta_min        2.76
_cell_measurement_theta_max       29.76
_exptl_crystal_description       'needle'
_exptl_crystal_colour            'colourless'
_exptl_crystal_size_max           0.89 
_exptl_crystal_size_mid           0.12 
_exptl_crystal_size_min           0.09 
_exptl_crystal_density_meas       ? 
_exptl_crystal_density_diffrn     1.814 
_exptl_crystal_density_method     'not measured' 
_exptl_crystal_F_000              680 
_exptl_absorpt_coefficient_mu     3.619 
_exptl_absorpt_correction_type    'multi-scan' 
_exptl_absorpt_correction_T_min   0.1406 
_exptl_absorpt_correction_T_max   0.7436 
_exptl_absorpt_process_details    '(<i>SADABS</i>; Bruker, 2009)'  
 
_exptl_special_details 
; 
The crystal was placed in the cold stream of an Oxford Cryosystems 
Cobra open-flow nitrogen cryostat (Cosier & Glazer, 1986) operating 
at 100.0(1)K. 
; 
 
_diffrn_ambient_temperature       100.0(1)
_diffrn_radiation_wavelength      0.71073 
_diffrn_radiation_type            MoK\a 
_diffrn_radiation_source          'fine-focus sealed tube' 
_diffrn_radiation_monochromator   graphite 
_diffrn_measurement_device_type   'Bruker APEX Duo CCD area detector'
_diffrn_measurement_method        '\f and \w scans'  
_diffrn_detector_area_resol_mean  ? 
_diffrn_standards_number          0 
_diffrn_standards_interval_count  . 
_diffrn_standards_interval_time   . 
_diffrn_standards_decay_%         ? 
_diffrn_reflns_number             2855 
_diffrn_reflns_av_R_equivalents   0.0000 
_diffrn_reflns_av_sigmaI/netI     0.0307 
_diffrn_reflns_limit_h_min        -5 
_diffrn_reflns_limit_h_max        5 
_diffrn_reflns_limit_k_min        -41 
_diffrn_reflns_limit_k_max        41 
_diffrn_reflns_limit_l_min        -1 
_diffrn_reflns_limit_l_max        13 
_diffrn_reflns_theta_min          2.09 
_diffrn_reflns_theta_max          27.50 
_reflns_number_total              2855 
_reflns_number_gt                 2624 
_reflns_threshold_expression      'I > 2\s(I)' 
 
_computing_data_collection        'APEX2 (Bruker, 2009)' 
_computing_cell_refinement        'SAINT (Bruker, 2009)' 
_computing_data_reduction          SAINT
_computing_structure_solution     'SHELXTL (Sheldrick, 2008)' 
_computing_structure_refinement    SHELXTL 
_computing_molecular_graphics      SHELXTL 
_computing_publication_material
;
SHELXTL and PLATON (Spek, 2009)
;
 
_refine_special_details 
; 
 Refinement of F^2^ against ALL reflections.  The weighted R-factor wR and 
 goodness of fit S are based on F^2^, conventional R-factors R are based 
 on F, with F set to zero for negative F^2^. The threshold expression of 
 F^2^ > 2sigma(F^2^) is used only for calculating R-factors(gt) etc. and is 
 not relevant to the choice of reflections for refinement.  R-factors based 
 on F^2^ are statistically about twice as large as those based on F, and R- 
 factors based on ALL data will be even larger. 
; 
 
_refine_ls_structure_factor_coef  Fsqd  
_refine_ls_matrix_type            full 
_refine_ls_weighting_scheme       calc  
_refine_ls_weighting_details 
 'calc w=1/[\s^2^(Fo^2^)+(0.0478P)^2^+5.4749P] where P=(Fo^2^+2Fc^2^)/3' 
_atom_sites_solution_primary      direct 
_atom_sites_solution_secondary    difmap 
_atom_sites_solution_hydrogens    geom 
_refine_ls_hydrogen_treatment     constr 
_refine_ls_extinction_method      none 
_refine_ls_extinction_coef        ? 
_refine_ls_number_reflns          2855 
_refine_ls_number_parameters      164 
_refine_ls_number_restraints      0 
_refine_ls_R_factor_all           0.0554 
_refine_ls_R_factor_gt            0.0509 
_refine_ls_wR_factor_ref          0.1272 
_refine_ls_wR_factor_gt           0.1245 
_refine_ls_goodness_of_fit_ref    1.091 
_refine_ls_restrained_S_all       1.091 
_refine_ls_shift/su_max           <0.001 
_refine_ls_shift/su_mean          <0.001
 
loop_ 
 _atom_site_label 
 _atom_site_type_symbol 
 _atom_site_fract_x 
 _atom_site_fract_y 
 _atom_site_fract_z 
 _atom_site_U_iso_or_equiv 
 _atom_site_adp_type 
 _atom_site_occupancy 
 _atom_site_symmetry_multiplicity 
 _atom_site_calc_flag 
 _atom_site_refinement_flags 
 _atom_site_disorder_assembly 
 _atom_site_disorder_group 
Br1 Br 0.03181(12) 0.495663(15) 0.26487(5) 0.03367(17) Uani 1 1 d . . . 
Cl1 Cl 0.3924(4) 0.07855(4) 0.42968(14) 0.0390(3) Uani 1 1 d . . . 
S1 S 0.5516(3) 0.16294(3) 0.53812(11) 0.0238(2) Uani 1 1 d . . . 
F1 F 0.6351(8) 0.39899(8) 0.6197(3) 0.0352(7) Uani 1 1 d . . . 
O1 O 0.6938(10) 0.24843(10) 0.6188(3) 0.0352(8) Uani 1 1 d . . . 
C1 C 0.3615(11) 0.13210(13) 0.4158(5) 0.0252(9) Uani 1 1 d . . . 
C2 C 0.1993(11) 0.15391(13) 0.3151(4) 0.0253(9) Uani 1 1 d . . . 
H2A H 0.0806 0.1415 0.2397 0.030 Uiso 1 1 calc R . . 
C3 C 0.2294(11) 0.19758(14) 0.3365(4) 0.0248(9) Uani 1 1 d . . . 
H3A H 0.1320 0.2180 0.2766 0.030 Uiso 1 1 calc R . . 
C4 C 0.4141(11) 0.20725(12) 0.4528(4) 0.0214(8) Uani 1 1 d . . . 
C5 C 0.5129(13) 0.24739(14) 0.5132(4) 0.0281(10) Uani 1 1 d . . . 
C6 C 0.3855(13) 0.28578(15) 0.4427(5) 0.0303(10) Uani 1 1 d . . . 
H6A H 0.2541 0.2834 0.3602 0.036 Uiso 1 1 calc R . . 
C7 C 0.4540(12) 0.32333(15) 0.4941(4) 0.0273(9) Uani 1 1 d . . . 
H7A H 0.5893 0.3240 0.5761 0.033 Uiso 1 1 calc R . . 
C8 C 0.3441(13) 0.36354(14) 0.4384(4) 0.0283(10) Uani 1 1 d . . . 
C9 C 0.1406(13) 0.36834(15) 0.3175(5) 0.0295(10) Uani 1 1 d . . . 
H9A H 0.0624 0.3440 0.2707 0.035 Uiso 1 1 calc R . . 
C10 C 0.0521(12) 0.40683(15) 0.2653(5) 0.0291(9) Uani 1 1 d . . . 
H10A H -0.0789 0.4089 0.1827 0.035 Uiso 1 1 calc R . . 
C11 C 0.1563(11) 0.44276(13) 0.3346(4) 0.0244(8) Uani 1 1 d . . . 
C12 C 0.3498(11) 0.44018(13) 0.4554(4) 0.0225(8) Uani 1 1 d . . . 
H12A H 0.4180 0.4647 0.5036 0.027 Uiso 1 1 calc R . . 
C13 C 0.4391(12) 0.40094(14) 0.5027(4) 0.0262(9) Uani 1 1 d . . . 
 
loop_ 
 _atom_site_aniso_label 
 _atom_site_aniso_U_11 
 _atom_site_aniso_U_22 
 _atom_site_aniso_U_33 
 _atom_site_aniso_U_23 
 _atom_site_aniso_U_13 
 _atom_site_aniso_U_12 
Br1 0.0276(3) 0.0307(3) 0.0410(3) -0.00087(19) -0.00640(19) 0.00624(18) 
Cl1 0.0435(7) 0.0202(5) 0.0534(8) -0.0002(5) 0.0048(6) 0.0004(5) 
S1 0.0199(5) 0.0238(5) 0.0270(5) 0.0037(4) -0.0012(4) -0.0003(4) 
F1 0.0552(19) 0.0248(13) 0.0243(13) 0.0000(10) -0.0038(13) -0.0049(12) 
O1 0.042(2) 0.0310(17) 0.0323(18) -0.0026(14) 0.0006(15) -0.0060(15) 
C1 0.019(2) 0.0229(19) 0.033(2) 0.0013(17) 0.0045(17) -0.0007(16) 
C2 0.024(2) 0.026(2) 0.026(2) -0.0067(17) -0.0018(17) 0.0004(16) 
C3 0.025(2) 0.026(2) 0.024(2) 0.0000(16) 0.0020(17) 0.0063(16) 
C4 0.023(2) 0.0174(18) 0.024(2) 0.0032(15) 0.0050(16) 0.0002(15) 
C5 0.038(3) 0.025(2) 0.022(2) 0.0010(17) 0.0060(18) -0.0047(18) 
C6 0.031(2) 0.030(2) 0.030(2) 0.0008(18) 0.0012(19) -0.0025(19) 
C7 0.024(2) 0.032(2) 0.026(2) 0.0004(17) 0.0031(17) 0.0008(17) 
C8 0.037(2) 0.022(2) 0.027(2) -0.0029(17) 0.0119(19) -0.0072(18) 
C9 0.034(2) 0.029(2) 0.026(2) -0.0069(18) 0.0078(19) -0.0094(19) 
C10 0.024(2) 0.037(2) 0.027(2) -0.0095(19) 0.0006(17) -0.0028(18) 
C11 0.0190(19) 0.024(2) 0.031(2) -0.0035(17) 0.0027(16) 0.0002(16) 
C12 0.0192(19) 0.023(2) 0.026(2) -0.0085(16) 0.0031(16) -0.0049(15) 
C13 0.028(2) 0.029(2) 0.022(2) -0.0071(17) 0.0061(17) -0.0062(17) 
 
_geom_special_details 
; 
 All esds (except the esd in the dihedral angle between two l.s. planes) 
 are estimated using the full covariance matrix.  The cell esds are taken 
 into account individually in the estimation of esds in distances, angles 
 and torsion angles; correlations between esds in cell parameters are only 
 used when they are defined by crystal symmetry.  An approximate (isotropic) 
 treatment of cell esds is used for estimating esds involving l.s. planes. 
; 
 
loop_ 
 _geom_bond_atom_site_label_1 
 _geom_bond_atom_site_label_2 
 _geom_bond_distance 
 _geom_bond_site_symmetry_2 
 _geom_bond_publ_flag 
Br1 C11 1.882(4) . ? 
Cl1 C1 1.720(4) . ? 
S1 C1 1.710(5) . ? 
S1 C4 1.724(4) . ? 
F1 C13 1.363(5) . ? 
O1 C5 1.237(6) . ? 
C1 C2 1.353(6) . ? 
C2 C3 1.416(6) . ? 
C2 H2A 0.9500 . ? 
C3 C4 1.371(6) . ? 
C3 H3A 0.9500 . ? 
C4 C5 1.460(6) . ? 
C5 C6 1.486(6) . ? 
C6 C7 1.328(7) . ? 
C6 H6A 0.9500 . ? 
C7 C8 1.454(6) . ? 
C7 H7A 0.9500 . ? 
C8 C13 1.398(6) . ? 
C8 C9 1.417(7) . ? 
C9 C10 1.373(7) . ? 
C9 H9A 0.9500 . ? 
C10 C11 1.391(6) . ? 
C10 H10A 0.9500 . ? 
C11 C12 1.392(6) . ? 
C12 C13 1.377(6) . ? 
C12 H12A 0.9500 . ? 
 
loop_ 
 _geom_angle_atom_site_label_1 
 _geom_angle_atom_site_label_2 
 _geom_angle_atom_site_label_3 
 _geom_angle 
 _geom_angle_site_symmetry_1 
 _geom_angle_site_symmetry_3 
 _geom_angle_publ_flag 
C1 S1 C4 90.4(2) . . ? 
C2 C1 S1 113.8(3) . . ? 
C2 C1 Cl1 126.8(4) . . ? 
S1 C1 Cl1 119.4(3) . . ? 
C1 C2 C3 111.3(4) . . ? 
C1 C2 H2A 124.4 . . ? 
C3 C2 H2A 124.4 . . ? 
C4 C3 C2 112.7(4) . . ? 
C4 C3 H3A 123.6 . . ? 
C2 C3 H3A 123.6 . . ? 
C3 C4 C5 131.6(4) . . ? 
C3 C4 S1 111.7(3) . . ? 
C5 C4 S1 116.7(3) . . ? 
O1 C5 C4 120.1(4) . . ? 
O1 C5 C6 122.8(4) . . ? 
C4 C5 C6 117.1(4) . . ? 
C7 C6 C5 120.4(4) . . ? 
C7 C6 H6A 119.8 . . ? 
C5 C6 H6A 119.8 . . ? 
C6 C7 C8 126.9(4) . . ? 
C6 C7 H7A 116.5 . . ? 
C8 C7 H7A 116.5 . . ? 
C13 C8 C9 115.0(4) . . ? 
C13 C8 C7 121.0(4) . . ? 
C9 C8 C7 124.0(4) . . ? 
C10 C9 C8 122.6(4) . . ? 
C10 C9 H9A 118.7 . . ? 
C8 C9 H9A 118.7 . . ? 
C9 C10 C11 119.3(4) . . ? 
C9 C10 H10A 120.4 . . ? 
C11 C10 H10A 120.4 . . ? 
C10 C11 C12 121.0(4) . . ? 
C10 C11 Br1 119.6(3) . . ? 
C12 C11 Br1 119.4(3) . . ? 
C13 C12 C11 117.7(4) . . ? 
C13 C12 H12A 121.1 . . ? 
C11 C12 H12A 121.1 . . ? 
F1 C13 C12 117.0(4) . . ? 
F1 C13 C8 118.6(4) . . ? 
C12 C13 C8 124.4(4) . . ? 
 
loop_ 
 _geom_torsion_atom_site_label_1 
 _geom_torsion_atom_site_label_2 
 _geom_torsion_atom_site_label_3 
 _geom_torsion_atom_site_label_4 
 _geom_torsion 
 _geom_torsion_site_symmetry_1 
 _geom_torsion_site_symmetry_2 
 _geom_torsion_site_symmetry_3 
 _geom_torsion_site_symmetry_4 
 _geom_torsion_publ_flag 
C4 S1 C1 C2 -0.3(4) . . . . ? 
C4 S1 C1 Cl1 179.3(3) . . . . ? 
S1 C1 C2 C3 0.2(5) . . . . ? 
Cl1 C1 C2 C3 -179.4(3) . . . . ? 
C1 C2 C3 C4 0.1(6) . . . . ? 
C2 C3 C4 C5 178.9(5) . . . . ? 
C2 C3 C4 S1 -0.4(5) . . . . ? 
C1 S1 C4 C3 0.4(4) . . . . ? 
C1 S1 C4 C5 -179.0(4) . . . . ? 
C3 C4 C5 O1 -177.5(5) . . . . ? 
S1 C4 C5 O1 1.7(6) . . . . ? 
C3 C4 C5 C6 2.9(7) . . . . ? 
S1 C4 C5 C6 -177.9(3) . . . . ? 
O1 C5 C6 C7 -2.2(8) . . . . ? 
C4 C5 C6 C7 177.4(4) . . . . ? 
C5 C6 C7 C8 -179.1(4) . . . . ? 
C6 C7 C8 C13 -179.1(5) . . . . ? 
C6 C7 C8 C9 0.2(8) . . . . ? 
C13 C8 C9 C10 1.9(7) . . . . ? 
C7 C8 C9 C10 -177.5(5) . . . . ? 
C8 C9 C10 C11 -1.9(7) . . . . ? 
C9 C10 C11 C12 0.3(7) . . . . ? 
C9 C10 C11 Br1 -179.3(4) . . . . ? 
C10 C11 C12 C13 1.1(6) . . . . ? 
Br1 C11 C12 C13 -179.4(3) . . . . ? 
C11 C12 C13 F1 178.6(4) . . . . ? 
C11 C12 C13 C8 -1.0(7) . . . . ? 
C9 C8 C13 F1 180.0(4) . . . . ? 
C7 C8 C13 F1 -0.6(7) . . . . ? 
C9 C8 C13 C12 -0.4(7) . . . . ? 
C7 C8 C13 C12 179.0(4) . . . . ? 
 
_diffrn_measured_fraction_theta_max    0.991 
_diffrn_reflns_theta_full              27.50 
_diffrn_measured_fraction_theta_full   0.991 
_refine_diff_density_max    1.544 
_refine_diff_density_min   -0.659 
_refine_diff_density_rms    0.113 
#==============================================================================
 
data_3h
 
_audit_creation_method            SHELXL-97 
_chemical_name_systematic 
; 
 ? 
; 
_chemical_name_common             ? 
_chemical_melting_point           ? 
_chemical_formula_moiety          'C13 H7 Cl3 O S'
_chemical_formula_sum 
 'C13 H7 Cl3 O S' 
_chemical_formula_weight          317.60 
 
loop_ 
 _atom_type_symbol 
 _atom_type_description 
 _atom_type_scat_dispersion_real 
 _atom_type_scat_dispersion_imag 
 _atom_type_scat_source 
 'C'  'C'   0.0033   0.0016 
 'International Tables Vol C Tables 4.2.6.8 and 6.1.1.4' 
 'H'  'H'   0.0000   0.0000 
 'International Tables Vol C Tables 4.2.6.8 and 6.1.1.4' 
 'O'  'O'   0.0106   0.0060 
 'International Tables Vol C Tables 4.2.6.8 and 6.1.1.4' 
 'S'  'S'   0.1246   0.1234 
 'International Tables Vol C Tables 4.2.6.8 and 6.1.1.4' 
 'Cl'  'Cl'   0.1484   0.1585 
 'International Tables Vol C Tables 4.2.6.8 and 6.1.1.4' 
 
_symmetry_cell_setting                 Monoclinic
_symmetry_space_group_name_Hall      '-P 2ybc'
_symmetry_space_group_name_H-M       'P 21/c'

 
loop_ 
 _symmetry_equiv_pos_as_xyz 
 'x, y, z' 
 '-x, y+1/2, -z+1/2' 
 '-x, -y, -z' 
 'x, -y-1/2, z-1/2' 
 
_cell_length_a                    14.9864(10) 
_cell_length_b                    3.8085(3) 
_cell_length_c                    24.6297(13) 
_cell_angle_alpha                 90.00 
_cell_angle_beta                  115.264(3) 
_cell_angle_gamma                 90.00 
_cell_volume                      1271.30(15) 
_cell_formula_units_Z             4 
_cell_measurement_temperature     100.0(1)
_cell_measurement_reflns_used    6110
_cell_measurement_theta_min        2.77
_cell_measurement_theta_max       30.05
_exptl_crystal_description       'plate'
_exptl_crystal_colour            'colourless'

_exptl_crystal_size_max           0.51 
_exptl_crystal_size_mid           0.10 
_exptl_crystal_size_min           0.05 
_exptl_crystal_density_meas       ? 
_exptl_crystal_density_diffrn     1.659 
_exptl_crystal_density_method     'not measured' 
_exptl_crystal_F_000              640 
_exptl_absorpt_coefficient_mu     0.866 
_exptl_absorpt_correction_type    'multi-scan' 
_exptl_absorpt_correction_T_min   0.6650 
_exptl_absorpt_correction_T_max   0.9547 
_exptl_absorpt_process_details    '(<i>SADABS</i>; Bruker, 2009)'  
 
_exptl_special_details 
; 
The crystal was placed in the cold stream of an Oxford Cryosystems 
Cobra open-flow nitrogen cryostat (Cosier & Glazer, 1986) operating 
at 100.0(1)K. 
; 
 
_diffrn_ambient_temperature       100.0(1)
_diffrn_radiation_wavelength      0.71073 
_diffrn_radiation_type            MoK\a 
_diffrn_radiation_source          'fine-focus sealed tube' 
_diffrn_radiation_monochromator   graphite 
_diffrn_measurement_device_type   'Bruker APEX Duo CCD area detector'
_diffrn_measurement_method        '\f and \w scans'  
_diffrn_detector_area_resol_mean  ? 
_diffrn_standards_number          0 
_diffrn_standards_interval_count  . 
_diffrn_standards_interval_time   . 
_diffrn_standards_decay_%         ? 
_diffrn_reflns_number             11375 
_diffrn_reflns_av_R_equivalents   0.0239 
_diffrn_reflns_av_sigmaI/netI     0.0216 
_diffrn_reflns_limit_h_min        -19 
_diffrn_reflns_limit_h_max        19 
_diffrn_reflns_limit_k_min        -4 
_diffrn_reflns_limit_k_max        4 
_diffrn_reflns_limit_l_min        -31 
_diffrn_reflns_limit_l_max        31 
_diffrn_reflns_theta_min          1.50 
_diffrn_reflns_theta_max          27.49 
_reflns_number_total              2894 
_reflns_number_gt                 2607 
_reflns_threshold_expression      'I > 2\s(I)' 
 
_computing_data_collection        'APEX2 (Bruker, 2009)' 
_computing_cell_refinement        'SAINT (Bruker, 2009)' 
_computing_data_reduction          SAINT
_computing_structure_solution     'SHELXTL (Sheldrick, 2008)' 
_computing_structure_refinement    SHELXTL 
_computing_molecular_graphics      SHELXTL 
_computing_publication_material
;
SHELXTL and PLATON (Spek, 2009)
;

 
_refine_special_details 
; 
 Refinement of F^2^ against ALL reflections.  The weighted R-factor wR and 
 goodness of fit S are based on F^2^, conventional R-factors R are based 
 on F, with F set to zero for negative F^2^. The threshold expression of 
 F^2^ > 2sigma(F^2^) is used only for calculating R-factors(gt) etc. and is 
 not relevant to the choice of reflections for refinement.  R-factors based 
 on F^2^ are statistically about twice as large as those based on F, and R- 
 factors based on ALL data will be even larger. 
; 
 
_refine_ls_structure_factor_coef  Fsqd  
_refine_ls_matrix_type            full 
_refine_ls_weighting_scheme       calc  
_refine_ls_weighting_details 
 'calc w=1/[\s^2^(Fo^2^)+(0.0493P)^2^+3.8359P] where P=(Fo^2^+2Fc^2^)/3' 
_atom_sites_solution_primary      direct 
_atom_sites_solution_secondary    difmap 
_atom_sites_solution_hydrogens    geom 
_refine_ls_hydrogen_treatment     constr 
_refine_ls_extinction_method      none 
_refine_ls_extinction_coef        ? 
_refine_ls_number_reflns          2894 
_refine_ls_number_parameters      163 
_refine_ls_number_restraints      0 
_refine_ls_R_factor_all           0.0505 
_refine_ls_R_factor_gt            0.0456 
_refine_ls_wR_factor_ref          0.1200 
_refine_ls_wR_factor_gt           0.1154 
_refine_ls_goodness_of_fit_ref    1.052 
_refine_ls_restrained_S_all       1.052 
_refine_ls_shift/su_max           <0.001 
_refine_ls_shift/su_mean          <0.001
 
loop_ 
 _atom_site_label 
 _atom_site_type_symbol 
 _atom_site_fract_x 
 _atom_site_fract_y 
 _atom_site_fract_z 
 _atom_site_U_iso_or_equiv 
 _atom_site_adp_type 
 _atom_site_occupancy 
 _atom_site_symmetry_multiplicity 
 _atom_site_calc_flag 
 _atom_site_refinement_flags 
 _atom_site_disorder_assembly 
 _atom_site_disorder_group 
Cl1 Cl -0.03977(5) 0.2891(2) -0.11216(3) 0.03013(19) Uani 1 1 d . . . 
Cl2 Cl 0.65539(6) 0.4082(2) 0.31747(3) 0.03057(19) Uani 1 1 d . . . 
Cl3 Cl 0.88758(5) 0.9489(2) 0.22140(3) 0.02570(18) Uani 1 1 d . . . 
S1 S 0.16583(5) 0.53526(18) -0.07627(3) 0.01909(17) Uani 1 1 d . . . 
O1 O 0.37034(15) 0.7741(7) -0.02726(10) 0.0340(5) Uani 1 1 d . . . 
C1 C 0.0773(2) 0.3631(8) -0.05735(12) 0.0214(5) Uani 1 1 d . . . 
C2 C 0.1101(2) 0.2911(8) 0.00235(13) 0.0255(6) Uani 1 1 d . . . 
H2A H 0.0712 0.1986 0.0199 0.031 Uiso 1 1 calc R . . 
C3 C 0.2112(2) 0.3763(8) 0.03398(12) 0.0255(6) Uani 1 1 d . . . 
H3A H 0.2468 0.3450 0.0751 0.031 Uiso 1 1 calc R . . 
C4 C 0.25122(19) 0.5090(8) -0.00214(12) 0.0219(6) Uani 1 1 d . . . 
C5 C 0.3520(2) 0.6336(10) 0.01162(13) 0.0297(7) Uani 1 1 d . . . 
C6 C 0.4276(2) 0.5863(9) 0.07419(13) 0.0282(6) Uani 1 1 d . . . 
H6A H 0.4119 0.4693 0.1021 0.034 Uiso 1 1 calc R . . 
C7 C 0.5190(2) 0.7143(9) 0.09012(13) 0.0291(7) Uani 1 1 d . . . 
H7A H 0.5309 0.8252 0.0602 0.035 Uiso 1 1 calc R . . 
C8 C 0.6016(2) 0.6965(9) 0.14977(12) 0.0271(7) Uani 1 1 d . . . 
C9 C 0.5897(2) 0.5611(8) 0.19963(13) 0.0250(6) Uani 1 1 d . . . 
H9A H 0.5290 0.4748 0.1953 0.030 Uiso 1 1 calc R . . 
C10 C 0.6697(2) 0.5594(7) 0.25454(12) 0.0208(5) Uani 1 1 d . . . 
C11 C 0.7623(2) 0.6758(7) 0.26257(12) 0.0211(5) Uani 1 1 d . . . 
H11A H 0.8156 0.6704 0.3002 0.025 Uiso 1 1 calc R . . 
C12 C 0.77250(18) 0.8008(7) 0.21248(12) 0.0192(5) Uani 1 1 d . . . 
C13 C 0.6941(2) 0.8156(8) 0.15656(12) 0.0229(6) Uani 1 1 d . . . 
H13A H 0.7025 0.9035 0.1238 0.028 Uiso 1 1 calc R . . 
 
loop_ 
 _atom_site_aniso_label 
 _atom_site_aniso_U_11 
 _atom_site_aniso_U_22 
 _atom_site_aniso_U_33 
 _atom_site_aniso_U_23 
 _atom_site_aniso_U_13 
 _atom_site_aniso_U_12 
Cl1 0.0268(3) 0.0284(4) 0.0265(3) -0.0021(3) 0.0030(3) -0.0121(3) 
Cl2 0.0401(4) 0.0231(4) 0.0274(4) 0.0033(3) 0.0134(3) -0.0069(3) 
Cl3 0.0224(3) 0.0255(4) 0.0254(3) -0.0018(3) 0.0067(3) -0.0042(3) 
S1 0.0188(3) 0.0183(3) 0.0153(3) 0.0007(2) 0.0025(2) 0.0008(2) 
O1 0.0191(9) 0.0504(16) 0.0291(11) -0.0019(11) 0.0070(8) -0.0026(10) 
C1 0.0230(12) 0.0156(13) 0.0202(12) -0.0008(11) 0.0038(10) -0.0030(10) 
C2 0.0349(15) 0.0174(14) 0.0235(13) 0.0018(11) 0.0118(12) -0.0014(12) 
C3 0.0300(14) 0.0244(15) 0.0171(12) 0.0013(11) 0.0052(11) 0.0080(12) 
C4 0.0189(12) 0.0241(15) 0.0162(12) -0.0014(10) 0.0014(10) 0.0070(11) 
C5 0.0168(12) 0.0439(19) 0.0213(13) -0.0104(13) 0.0014(10) 0.0075(13) 
C6 0.0266(14) 0.0343(18) 0.0231(13) -0.0009(13) 0.0099(11) 0.0007(13) 
C7 0.0253(14) 0.0368(18) 0.0250(14) -0.0012(13) 0.0104(12) 0.0011(13) 
C8 0.0165(12) 0.0410(19) 0.0206(13) -0.0073(13) 0.0047(10) 0.0052(12) 
C9 0.0196(12) 0.0291(16) 0.0249(13) -0.0106(12) 0.0083(11) 0.0000(11) 
C10 0.0274(13) 0.0111(13) 0.0216(12) 0.0001(10) 0.0084(11) 0.0003(10) 
C11 0.0222(12) 0.0139(13) 0.0188(12) 0.0010(10) 0.0008(10) -0.0001(10) 
C12 0.0156(11) 0.0148(13) 0.0227(12) -0.0018(10) 0.0040(10) 0.0016(10) 
C13 0.0207(12) 0.0283(16) 0.0183(12) 0.0001(11) 0.0070(10) 0.0080(11) 
 
_geom_special_details 
; 
 All esds (except the esd in the dihedral angle between two l.s. planes) 
 are estimated using the full covariance matrix.  The cell esds are taken 
 into account individually in the estimation of esds in distances, angles 
 and torsion angles; correlations between esds in cell parameters are only 
 used when they are defined by crystal symmetry.  An approximate (isotropic) 
 treatment of cell esds is used for estimating esds involving l.s. planes. 
; 
 
loop_ 
 _geom_bond_atom_site_label_1 
 _geom_bond_atom_site_label_2 
 _geom_bond_distance 
 _geom_bond_site_symmetry_2 
 _geom_bond_publ_flag 
Cl1 C1 1.720(3) . ? 
Cl2 C10 1.750(3) . ? 
Cl3 C12 1.737(3) . ? 
S1 C1 1.713(3) . ? 
S1 C4 1.728(3) . ? 
O1 C5 1.226(4) . ? 
C1 C2 1.364(4) . ? 
C2 C3 1.415(4) . ? 
C2 H2A 0.9300 . ? 
C3 C4 1.364(4) . ? 
C3 H3A 0.9300 . ? 
C4 C5 1.478(4) . ? 
C5 C6 1.483(4) . ? 
C6 C7 1.345(4) . ? 
C6 H6A 0.9300 . ? 
C7 C8 1.464(4) . ? 
C7 H7A 0.9300 . ? 
C8 C13 1.399(4) . ? 
C8 C9 1.411(4) . ? 
C9 C10 1.372(4) . ? 
C9 H9A 0.9300 . ? 
C10 C11 1.388(4) . ? 
C11 C12 1.391(4) . ? 
C11 H11A 0.9300 . ? 
C12 C13 1.378(4) . ? 
C13 H13A 0.9300 . ? 
 
loop_ 
 _geom_angle_atom_site_label_1 
 _geom_angle_atom_site_label_2 
 _geom_angle_atom_site_label_3 
 _geom_angle 
 _geom_angle_site_symmetry_1 
 _geom_angle_site_symmetry_3 
 _geom_angle_publ_flag 
C1 S1 C4 90.05(13) . . ? 
C2 C1 S1 113.9(2) . . ? 
C2 C1 Cl1 126.2(2) . . ? 
S1 C1 Cl1 119.88(16) . . ? 
C1 C2 C3 110.8(3) . . ? 
C1 C2 H2A 124.6 . . ? 
C3 C2 H2A 124.6 . . ? 
C4 C3 C2 113.0(2) . . ? 
C4 C3 H3A 123.5 . . ? 
C2 C3 H3A 123.5 . . ? 
C3 C4 C5 131.3(3) . . ? 
C3 C4 S1 112.2(2) . . ? 
C5 C4 S1 116.6(2) . . ? 
O1 C5 C4 120.6(2) . . ? 
O1 C5 C6 122.6(3) . . ? 
C4 C5 C6 116.9(3) . . ? 
C7 C6 C5 119.3(3) . . ? 
C7 C6 H6A 120.3 . . ? 
C5 C6 H6A 120.3 . . ? 
C6 C7 C8 126.5(3) . . ? 
C6 C7 H7A 116.7 . . ? 
C8 C7 H7A 116.7 . . ? 
C13 C8 C9 120.1(2) . . ? 
C13 C8 C7 118.4(3) . . ? 
C9 C8 C7 121.6(3) . . ? 
C10 C9 C8 118.6(3) . . ? 
C10 C9 H9A 120.7 . . ? 
C8 C9 H9A 120.7 . . ? 
C9 C10 C11 122.6(3) . . ? 
C9 C10 Cl2 119.3(2) . . ? 
C11 C10 Cl2 118.1(2) . . ? 
C10 C11 C12 117.7(2) . . ? 
C10 C11 H11A 121.1 . . ? 
C12 C11 H11A 121.1 . . ? 
C13 C12 C11 122.0(3) . . ? 
C13 C12 Cl3 119.4(2) . . ? 
C11 C12 Cl3 118.6(2) . . ? 
C12 C13 C8 119.0(3) . . ? 
C12 C13 H13A 120.5 . . ? 
C8 C13 H13A 120.5 . . ? 
 
loop_ 
 _geom_torsion_atom_site_label_1 
 _geom_torsion_atom_site_label_2 
 _geom_torsion_atom_site_label_3 
 _geom_torsion_atom_site_label_4 
 _geom_torsion 
 _geom_torsion_site_symmetry_1 
 _geom_torsion_site_symmetry_2 
 _geom_torsion_site_symmetry_3 
 _geom_torsion_site_symmetry_4 
 _geom_torsion_publ_flag 
C4 S1 C1 C2 0.5(2) . . . . ? 
C4 S1 C1 Cl1 -178.3(2) . . . . ? 
S1 C1 C2 C3 -0.5(3) . . . . ? 
Cl1 C1 C2 C3 178.2(2) . . . . ? 
C1 C2 C3 C4 0.2(4) . . . . ? 
C2 C3 C4 C5 179.4(3) . . . . ? 
C2 C3 C4 S1 0.2(3) . . . . ? 
C1 S1 C4 C3 -0.4(2) . . . . ? 
C1 S1 C4 C5 -179.7(2) . . . . ? 
C3 C4 C5 O1 -173.3(3) . . . . ? 
S1 C4 C5 O1 5.8(4) . . . . ? 
C3 C4 C5 C6 5.5(5) . . . . ? 
S1 C4 C5 C6 -175.4(2) . . . . ? 
O1 C5 C6 C7 2.9(5) . . . . ? 
C4 C5 C6 C7 -175.9(3) . . . . ? 
C5 C6 C7 C8 178.9(3) . . . . ? 
C6 C7 C8 C13 174.1(3) . . . . ? 
C6 C7 C8 C9 -5.4(5) . . . . ? 
C13 C8 C9 C10 1.9(5) . . . . ? 
C7 C8 C9 C10 -178.5(3) . . . . ? 
C8 C9 C10 C11 -2.0(4) . . . . ? 
C8 C9 C10 Cl2 177.6(2) . . . . ? 
C9 C10 C11 C12 0.6(4) . . . . ? 
Cl2 C10 C11 C12 -179.0(2) . . . . ? 
C10 C11 C12 C13 0.9(4) . . . . ? 
C10 C11 C12 Cl3 179.8(2) . . . . ? 
C11 C12 C13 C8 -1.0(4) . . . . ? 
Cl3 C12 C13 C8 -179.9(2) . . . . ? 
C9 C8 C13 C12 -0.5(5) . . . . ? 
C7 C8 C13 C12 179.9(3) . . . . ? 
 
_diffrn_measured_fraction_theta_max    0.998 
_diffrn_reflns_theta_full              27.49 
_diffrn_measured_fraction_theta_full   0.998 
_refine_diff_density_max    1.078 
_refine_diff_density_min   -0.607 
_refine_diff_density_rms    0.094 

#==============================================================================
 
data_3i
 
_audit_creation_method            SHELXL-97 
_chemical_name_systematic 
; 
 ? 
; 
_chemical_name_common             ? 
_chemical_melting_point           ? 
_chemical_formula_moiety          'C13 H7 Cl3 O S' 
_chemical_formula_sum 
 'C13 H7 Cl3 O S' 
_chemical_formula_weight          317.60 
 
loop_ 
 _atom_type_symbol 
 _atom_type_description 
 _atom_type_scat_dispersion_real 
 _atom_type_scat_dispersion_imag 
 _atom_type_scat_source 
 'C'  'C'   0.0033   0.0016 
 'International Tables Vol C Tables 4.2.6.8 and 6.1.1.4' 
 'H'  'H'   0.0000   0.0000 
 'International Tables Vol C Tables 4.2.6.8 and 6.1.1.4' 
 'O'  'O'   0.0106   0.0060 
 'International Tables Vol C Tables 4.2.6.8 and 6.1.1.4' 
 'S'  'S'   0.1246   0.1234 
 'International Tables Vol C Tables 4.2.6.8 and 6.1.1.4' 
 'Cl'  'Cl'   0.1484   0.1585 
 'International Tables Vol C Tables 4.2.6.8 and 6.1.1.4' 
 
_symmetry_cell_setting                 Monoclinic
_symmetry_space_group_name_Hall      '-P 2ybc'
_symmetry_space_group_name_H-M       'P 21/c'
 
loop_ 
 _symmetry_equiv_pos_as_xyz 
 'x, y, z' 
 '-x, y+1/2, -z+1/2' 
 '-x, -y, -z' 
 'x, -y-1/2, z-1/2' 
 
_cell_length_a                    30.3418(16) 
_cell_length_b                    3.7985(2) 
_cell_length_c                    23.4311(12) 
_cell_angle_alpha                 90.00 
_cell_angle_beta                  109.2970(10) 
_cell_angle_gamma                 90.00 
_cell_volume                      2548.8(2) 
_cell_formula_units_Z             8 
_cell_measurement_temperature     100.0(1) 
_cell_measurement_reflns_used    5932
_cell_measurement_theta_min        2.85
_cell_measurement_theta_max       29.87
_exptl_crystal_description       'needle'
_exptl_crystal_colour            'colourless'
_exptl_crystal_size_max           0.60 
_exptl_crystal_size_mid           0.10 
_exptl_crystal_size_min           0.10 
_exptl_crystal_density_meas       ? 
_exptl_crystal_density_diffrn     1.655 
_exptl_crystal_density_method     'not measured' 
_exptl_crystal_F_000              1280 
_exptl_absorpt_coefficient_mu     0.864 
_exptl_absorpt_correction_type    'multi-scan' 
_exptl_absorpt_correction_T_min   0.6243 
_exptl_absorpt_correction_T_max   0.9224 
_exptl_absorpt_process_details    '(<i>SADABS</i>; Bruker, 2009)'  
 
_exptl_special_details 
; 
The crystal was placed in the cold stream of an Oxford Cryosystems 
Cobra open-flow nitrogen cryostat (Cosier & Glazer, 1986) operating 
at 100.0(1)K. 
; 
 
_diffrn_ambient_temperature       100.0(1)
_diffrn_radiation_wavelength      0.71073 
_diffrn_radiation_type            MoK\a 
_diffrn_radiation_source          'fine-focus sealed tube' 
_diffrn_radiation_monochromator   graphite 
_diffrn_measurement_device_type   'Bruker APEX Duo CCD area detector'
_diffrn_measurement_method        '\f and \w scans'  
_diffrn_detector_area_resol_mean  ? 
_diffrn_standards_number          0 
_diffrn_standards_interval_count  . 
_diffrn_standards_interval_time   . 
_diffrn_standards_decay_%         ? 
_diffrn_reflns_number             20108 
_diffrn_reflns_av_R_equivalents   0.0385 
_diffrn_reflns_av_sigmaI/netI     0.0386 
_diffrn_reflns_limit_h_min        -39 
_diffrn_reflns_limit_h_max        39 
_diffrn_reflns_limit_k_min        -4 
_diffrn_reflns_limit_k_max        4 
_diffrn_reflns_limit_l_min        -30 
_diffrn_reflns_limit_l_max        30 
_diffrn_reflns_theta_min          0.71 
_diffrn_reflns_theta_max          27.50 
_reflns_number_total              5762 
_reflns_number_gt                 4784 
_reflns_threshold_expression      'I > 2\s(I)' 
 
_computing_data_collection        'APEX2 (Bruker, 2009)' 
_computing_cell_refinement        'SAINT (Bruker, 2009)' 
_computing_data_reduction          SAINT
_computing_structure_solution     'SHELXTL (Sheldrick, 2008)' 
_computing_structure_refinement    SHELXTL 
_computing_molecular_graphics      SHELXTL 
_computing_publication_material
;
SHELXTL and PLATON (Spek, 2009)
;
 
_refine_special_details 
; 
 Refinement of F^2^ against ALL reflections.  The weighted R-factor wR and 
 goodness of fit S are based on F^2^, conventional R-factors R are based 
 on F, with F set to zero for negative F^2^. The threshold expression of 
 F^2^ > 2sigma(F^2^) is used only for calculating R-factors(gt) etc. and is 
 not relevant to the choice of reflections for refinement.  R-factors based 
 on F^2^ are statistically about twice as large as those based on F, and R- 
 factors based on ALL data will be even larger. 
; 
 
_refine_ls_structure_factor_coef  Fsqd  
_refine_ls_matrix_type            full 
_refine_ls_weighting_scheme       calc  
_refine_ls_weighting_details 
 'calc w=1/[\s^2^(Fo^2^)+(0.0430P)^2^+1.8291P] where P=(Fo^2^+2Fc^2^)/3' 
_atom_sites_solution_primary      direct 
_atom_sites_solution_secondary    difmap 
_atom_sites_solution_hydrogens    geom 
_refine_ls_hydrogen_treatment     constr 
_refine_ls_extinction_method      none 
_refine_ls_extinction_coef        ? 
_refine_ls_number_reflns          5762 
_refine_ls_number_parameters      325 
_refine_ls_number_restraints      0 
_refine_ls_R_factor_all           0.0433 
_refine_ls_R_factor_gt            0.0334 
_refine_ls_wR_factor_ref          0.0908 
_refine_ls_wR_factor_gt           0.0823 
_refine_ls_goodness_of_fit_ref    1.031 
_refine_ls_restrained_S_all       1.031 
_refine_ls_shift/su_max           0.001 
_refine_ls_shift/su_mean          0.000 
 
loop_ 
 _atom_site_label 
 _atom_site_type_symbol 
 _atom_site_fract_x 
 _atom_site_fract_y 
 _atom_site_fract_z 
 _atom_site_U_iso_or_equiv 
 _atom_site_adp_type 
 _atom_site_occupancy 
 _atom_site_symmetry_multiplicity 
 _atom_site_calc_flag 
 _atom_site_refinement_flags 
 _atom_site_disorder_assembly 
 _atom_site_disorder_group 
Cl1A Cl 0.093954(16) 0.68505(16) -0.06520(2) 0.02051(13) Uani 1 1 d . . . 
Cl2A Cl 0.381686(17) 1.30070(16) 0.16993(2) 0.01960(12) Uani 1 1 d . . . 
Cl3A Cl 0.432059(18) 0.78103(16) -0.01689(2) 0.02133(13) Uani 1 1 d . . . 
S1A S 0.184580(16) 0.96269(15) -0.06895(2) 0.01528(12) Uani 1 1 d . . . 
O1A O 0.27733(5) 1.2248(5) -0.05823(7) 0.0209(3) Uani 1 1 d . . . 
C1A C 0.15210(7) 0.7749(6) -0.02917(9) 0.0157(4) Uani 1 1 d . . . 
C2A C 0.17707(7) 0.7043(6) 0.02960(9) 0.0173(4) Uani 1 1 d . . . 
H2AA H 0.1643 0.6039 0.0579 0.021 Uiso 1 1 calc R . . 
C3A C 0.22444(7) 0.7999(6) 0.04308(9) 0.0167(4) Uani 1 1 d . . . 
H3AA H 0.2474 0.7680 0.0817 0.020 Uiso 1 1 calc R . . 
C4A C 0.23404(7) 0.9435(6) -0.00532(9) 0.0147(4) Uani 1 1 d . . . 
C5A C 0.27751(7) 1.0766(6) -0.01148(9) 0.0166(4) Uani 1 1 d . . . 
C6A C 0.32120(7) 1.0189(6) 0.04031(9) 0.0179(5) Uani 1 1 d . . . 
H6AA H 0.3200 0.9317 0.0778 0.022 Uiso 1 1 calc R . . 
C7A C 0.36209(7) 1.0923(6) 0.03302(9) 0.0169(4) Uani 1 1 d . . . 
H7AA H 0.3608 1.1875 -0.0050 0.020 Uiso 1 1 calc R . . 
C8A C 0.40900(7) 1.0415(6) 0.07755(9) 0.0156(4) Uani 1 1 d . . . 
C9A C 0.42198(7) 1.1271(6) 0.13916(9) 0.0152(4) Uani 1 1 d . . . 
C10A C 0.46729(7) 1.0880(6) 0.17826(9) 0.0179(4) Uani 1 1 d . . . 
H10A H 0.4749 1.1490 0.2197 0.022 Uiso 1 1 calc R . . 
C11A C 0.50148(7) 0.9598(6) 0.15661(10) 0.0201(5) Uani 1 1 d . . . 
H11A H 0.5326 0.9346 0.1834 0.024 Uiso 1 1 calc R . . 
C12A C 0.49070(7) 0.8677(6) 0.09622(10) 0.0189(5) Uani 1 1 d . . . 
H12A H 0.5141 0.7786 0.0813 0.023 Uiso 1 1 calc R . . 
C13A C 0.44516(7) 0.9086(6) 0.05823(9) 0.0157(4) Uani 1 1 d . . . 
Cl1B Cl 0.393785(16) 0.99157(16) 0.33563(2) 0.02094(13) Uani 1 1 d . . . 
Cl2B Cl 0.126606(17) -0.00814(16) 0.29771(2) 0.02125(13) Uani 1 1 d . . . 
Cl3B Cl 0.070829(17) 0.20868(17) 0.05327(2) 0.02026(13) Uani 1 1 d . . . 
S1B S 0.312179(16) 0.68787(16) 0.24007(2) 0.01507(12) Uani 1 1 d . . . 
O1B O 0.22880(5) 0.3548(5) 0.15785(6) 0.0197(3) Uani 1 1 d . . . 
C1B C 0.33745(7) 0.8366(6) 0.31276(9) 0.0154(4) Uani 1 1 d . . . 
C2B C 0.30902(7) 0.8150(7) 0.34721(9) 0.0191(5) Uani 1 1 d . . . 
H2BA H 0.3176 0.8857 0.3883 0.023 Uiso 1 1 calc R . . 
C3B C 0.26496(7) 0.6731(7) 0.31344(9) 0.0181(5) Uani 1 1 d . . . 
H3BA H 0.2403 0.6392 0.3295 0.022 Uiso 1 1 calc R . . 
C4B C 0.26145(6) 0.5894(6) 0.25501(9) 0.0134(4) Uani 1 1 d . . . 
C5B C 0.22352(7) 0.4276(6) 0.20610(9) 0.0143(4) Uani 1 1 d . . . 
C6B C 0.17888(7) 0.3528(6) 0.21760(9) 0.0154(4) Uani 1 1 d . . . 
H6BA H 0.1749 0.4209 0.2546 0.018 Uiso 1 1 calc R . . 
C7B C 0.14469(7) 0.1884(6) 0.17490(9) 0.0145(4) Uani 1 1 d . . . 
H7BA H 0.1516 0.1286 0.1394 0.017 Uiso 1 1 calc R . . 
C8B C 0.09788(7) 0.0860(6) 0.17457(9) 0.0136(4) Uani 1 1 d . . . 
C9B C 0.08575(7) -0.0165(6) 0.22523(9) 0.0149(4) Uani 1 1 d . . . 
C10B C 0.04154(7) -0.1355(6) 0.22074(9) 0.0179(4) Uani 1 1 d . . . 
H10B H 0.0350 -0.2065 0.2560 0.021 Uiso 1 1 calc R . . 
C11B C 0.00688(7) -0.1506(7) 0.16458(10) 0.0198(5) Uani 1 1 d . . . 
H11B H -0.0235 -0.2314 0.1613 0.024 Uiso 1 1 calc R . . 
C12B C 0.01660(7) -0.0479(6) 0.11334(9) 0.0184(5) Uani 1 1 d . . . 
H12B H -0.0070 -0.0567 0.0748 0.022 Uiso 1 1 calc R . . 
C13B C 0.06109(7) 0.0679(6) 0.11871(9) 0.0150(4) Uani 1 1 d . . . 
 
loop_ 
 _atom_site_aniso_label 
 _atom_site_aniso_U_11 
 _atom_site_aniso_U_22 
 _atom_site_aniso_U_33 
 _atom_site_aniso_U_23 
 _atom_site_aniso_U_13 
 _atom_site_aniso_U_12 
Cl1A 0.0130(2) 0.0269(3) 0.0201(2) -0.0032(2) 0.00345(17) -0.0026(2) 
Cl2A 0.0196(2) 0.0224(3) 0.0196(2) -0.0018(2) 0.01035(18) 0.0021(2) 
Cl3A 0.0248(3) 0.0238(3) 0.0184(2) -0.0035(2) 0.01108(19) -0.0013(2) 
S1A 0.0138(2) 0.0184(3) 0.0126(2) 0.0011(2) 0.00293(17) 0.0003(2) 
O1A 0.0196(7) 0.0260(9) 0.0181(7) 0.0033(7) 0.0076(6) -0.0009(7) 
C1A 0.0135(9) 0.0141(11) 0.0186(9) -0.0012(9) 0.0041(7) -0.0006(9) 
C2A 0.0181(9) 0.0194(12) 0.0162(9) 0.0006(9) 0.0082(7) -0.0011(9) 
C3A 0.0175(9) 0.0187(12) 0.0130(9) 0.0014(9) 0.0036(7) 0.0024(9) 
C4A 0.0136(9) 0.0155(11) 0.0137(8) -0.0016(9) 0.0028(7) 0.0013(9) 
C5A 0.0168(9) 0.0168(11) 0.0165(9) -0.0002(9) 0.0057(7) 0.0007(9) 
C6A 0.0165(9) 0.0194(12) 0.0166(9) 0.0019(9) 0.0036(7) -0.0002(9) 
C7A 0.0179(9) 0.0174(12) 0.0156(9) -0.0004(9) 0.0056(7) 0.0000(9) 
C8A 0.0144(9) 0.0152(11) 0.0173(9) 0.0005(9) 0.0054(7) -0.0009(9) 
C9A 0.0169(9) 0.0119(11) 0.0190(9) 0.0006(9) 0.0088(8) -0.0011(9) 
C10A 0.0192(10) 0.0163(12) 0.0171(9) 0.0005(9) 0.0045(8) -0.0027(9) 
C11A 0.0158(9) 0.0194(12) 0.0227(10) 0.0027(10) 0.0032(8) -0.0004(9) 
C12A 0.0160(9) 0.0164(12) 0.0270(10) 0.0027(10) 0.0107(8) 0.0012(9) 
C13A 0.0192(9) 0.0136(11) 0.0160(9) -0.0002(9) 0.0083(7) -0.0024(9) 
Cl1B 0.0132(2) 0.0226(3) 0.0234(2) 0.0012(2) 0.00108(18) -0.0046(2) 
Cl2B 0.0209(2) 0.0279(3) 0.0131(2) 0.0021(2) 0.00297(18) -0.0033(2) 
Cl3B 0.0175(2) 0.0294(3) 0.0124(2) 0.0008(2) 0.00305(17) -0.0017(2) 
S1B 0.0119(2) 0.0190(3) 0.0143(2) -0.0004(2) 0.00429(17) -0.0017(2) 
O1B 0.0180(7) 0.0266(9) 0.0142(6) -0.0024(7) 0.0048(5) -0.0041(7) 
C1B 0.0129(9) 0.0128(11) 0.0177(9) -0.0002(9) 0.0011(7) -0.0006(9) 
C2B 0.0186(10) 0.0222(12) 0.0155(9) -0.0022(9) 0.0041(8) -0.0004(10) 
C3B 0.0150(9) 0.0232(13) 0.0173(9) 0.0011(9) 0.0071(7) -0.0005(9) 
C4B 0.0106(8) 0.0138(11) 0.0154(9) 0.0020(9) 0.0038(7) -0.0002(8) 
C5B 0.0135(9) 0.0123(11) 0.0154(9) 0.0019(9) 0.0024(7) 0.0009(9) 
C6B 0.0141(9) 0.0158(11) 0.0161(9) 0.0001(9) 0.0050(7) 0.0001(9) 
C7B 0.0144(9) 0.0137(11) 0.0146(9) 0.0041(8) 0.0039(7) 0.0028(9) 
C8B 0.0140(9) 0.0103(10) 0.0156(9) -0.0008(8) 0.0038(7) -0.0003(8) 
C9B 0.0153(9) 0.0139(11) 0.0142(9) -0.0008(8) 0.0033(7) 0.0018(9) 
C10B 0.0200(10) 0.0165(12) 0.0200(9) 0.0019(9) 0.0105(8) 0.0003(9) 
C11B 0.0146(9) 0.0196(12) 0.0262(11) -0.0027(10) 0.0083(8) -0.0024(9) 
C12B 0.0119(9) 0.0205(12) 0.0199(9) -0.0036(10) 0.0013(7) -0.0009(9) 
C13B 0.0156(9) 0.0147(11) 0.0143(9) -0.0012(9) 0.0046(7) -0.0018(9) 
 
_geom_special_details 
; 
 All esds (except the esd in the dihedral angle between two l.s. planes) 
 are estimated using the full covariance matrix.  The cell esds are taken 
 into account individually in the estimation of esds in distances, angles 
 and torsion angles; correlations between esds in cell parameters are only 
 used when they are defined by crystal symmetry.  An approximate (isotropic) 
 treatment of cell esds is used for estimating esds involving l.s. planes. 
; 
 
loop_ 
 _geom_bond_atom_site_label_1 
 _geom_bond_atom_site_label_2 
 _geom_bond_distance 
 _geom_bond_site_symmetry_2 
 _geom_bond_publ_flag 
Cl1A C1A 1.720(2) . ? 
Cl2A C9A 1.741(2) . ? 
Cl3A C13A 1.740(2) . ? 
S1A C1A 1.719(2) . ? 
S1A C4A 1.7324(19) . ? 
O1A C5A 1.230(3) . ? 
C1A C2A 1.361(3) . ? 
C2A C3A 1.413(3) . ? 
C2A H2AA 0.9500 . ? 
C3A C4A 1.374(3) . ? 
C3A H3AA 0.9500 . ? 
C4A C5A 1.464(3) . ? 
C5A C6A 1.488(3) . ? 
C6A C7A 1.336(3) . ? 
C6A H6AA 0.9500 . ? 
C7A C8A 1.473(3) . ? 
C7A H7AA 0.9500 . ? 
C8A C9A 1.403(3) . ? 
C8A C13A 1.411(3) . ? 
C9A C10A 1.385(3) . ? 
C10A C11A 1.385(3) . ? 
C10A H10A 0.9500 . ? 
C11A C12A 1.388(3) . ? 
C11A H11A 0.9500 . ? 
C12A C13A 1.383(3) . ? 
C12A H12A 0.9500 . ? 
Cl1B C1B 1.718(2) . ? 
Cl2B C9B 1.741(2) . ? 
Cl3B C13B 1.739(2) . ? 
S1B C1B 1.716(2) . ? 
S1B C4B 1.729(2) . ? 
O1B C5B 1.225(2) . ? 
C1B C2B 1.365(3) . ? 
C2B C3B 1.416(3) . ? 
C2B H2BA 0.9500 . ? 
C3B C4B 1.375(3) . ? 
C3B H3BA 0.9500 . ? 
C4B C5B 1.464(3) . ? 
C5B C6B 1.493(3) . ? 
C6B C7B 1.335(3) . ? 
C6B H6BA 0.9500 . ? 
C7B C8B 1.470(3) . ? 
C7B H7BA 0.9500 . ? 
C8B C9B 1.409(3) . ? 
C8B C13B 1.414(3) . ? 
C9B C10B 1.386(3) . ? 
C10B C11B 1.388(3) . ? 
C10B H10B 0.9500 . ? 
C11B C12B 1.384(3) . ? 
C11B H11B 0.9500 . ? 
C12B C13B 1.385(3) . ? 
C12B H12B 0.9500 . ? 
 
loop_ 
 _geom_angle_atom_site_label_1 
 _geom_angle_atom_site_label_2 
 _geom_angle_atom_site_label_3 
 _geom_angle 
 _geom_angle_site_symmetry_1 
 _geom_angle_site_symmetry_3 
 _geom_angle_publ_flag 
C1A S1A C4A 90.26(10) . . ? 
C2A C1A S1A 113.78(15) . . ? 
C2A C1A Cl1A 126.53(17) . . ? 
S1A C1A Cl1A 119.67(12) . . ? 
C1A C2A C3A 111.12(19) . . ? 
C1A C2A H2AA 124.4 . . ? 
C3A C2A H2AA 124.4 . . ? 
C4A C3A C2A 113.26(18) . . ? 
C4A C3A H3AA 123.4 . . ? 
C2A C3A H3AA 123.4 . . ? 
C3A C4A C5A 131.48(18) . . ? 
C3A C4A S1A 111.57(15) . . ? 
C5A C4A S1A 116.95(15) . . ? 
O1A C5A C4A 120.45(18) . . ? 
O1A C5A C6A 122.29(19) . . ? 
C4A C5A C6A 117.25(18) . . ? 
C7A C6A C5A 118.66(19) . . ? 
C7A C6A H6AA 120.7 . . ? 
C5A C6A H6AA 120.7 . . ? 
C6A C7A C8A 127.07(19) . . ? 
C6A C7A H7AA 116.5 . . ? 
C8A C7A H7AA 116.5 . . ? 
C9A C8A C13A 115.41(18) . . ? 
C9A C8A C7A 125.13(19) . . ? 
C13A C8A C7A 119.42(18) . . ? 
C10A C9A C8A 122.37(19) . . ? 
C10A C9A Cl2A 116.48(16) . . ? 
C8A C9A Cl2A 121.13(15) . . ? 
C11A C10A C9A 119.69(19) . . ? 
C11A C10A H10A 120.2 . . ? 
C9A C10A H10A 120.2 . . ? 
C10A C11A C12A 120.61(19) . . ? 
C10A C11A H11A 119.7 . . ? 
C12A C11A H11A 119.7 . . ? 
C13A C12A C11A 118.5(2) . . ? 
C13A C12A H12A 120.8 . . ? 
C11A C12A H12A 120.8 . . ? 
C12A C13A C8A 123.44(19) . . ? 
C12A C13A Cl3A 117.74(16) . . ? 
C8A C13A Cl3A 118.81(15) . . ? 
C1B S1B C4B 90.34(10) . . ? 
C2B C1B S1B 113.88(15) . . ? 
C2B C1B Cl1B 126.48(16) . . ? 
S1B C1B Cl1B 119.64(12) . . ? 
C1B C2B C3B 110.92(19) . . ? 
C1B C2B H2BA 124.5 . . ? 
C3B C2B H2BA 124.5 . . ? 
C4B C3B C2B 113.12(19) . . ? 
C4B C3B H3BA 123.4 . . ? 
C2B C3B H3BA 123.4 . . ? 
C3B C4B C5B 131.21(19) . . ? 
C3B C4B S1B 111.74(15) . . ? 
C5B C4B S1B 117.03(15) . . ? 
O1B C5B C4B 120.57(18) . . ? 
O1B C5B C6B 121.79(18) . . ? 
C4B C5B C6B 117.63(17) . . ? 
C7B C6B C5B 118.71(18) . . ? 
C7B C6B H6BA 120.6 . . ? 
C5B C6B H6BA 120.6 . . ? 
C6B C7B C8B 129.64(19) . . ? 
C6B C7B H7BA 115.2 . . ? 
C8B C7B H7BA 115.2 . . ? 
C9B C8B C13B 114.86(18) . . ? 
C9B C8B C7B 126.12(17) . . ? 
C13B C8B C7B 118.93(18) . . ? 
C10B C9B C8B 122.81(18) . . ? 
C10B C9B Cl2B 116.06(16) . . ? 
C8B C9B Cl2B 121.12(15) . . ? 
C9B C10B C11B 119.8(2) . . ? 
C9B C10B H10B 120.1 . . ? 
C11B C10B H10B 120.1 . . ? 
C12B C11B C10B 119.9(2) . . ? 
C12B C11B H11B 120.0 . . ? 
C10B C11B H11B 120.0 . . ? 
C11B C12B C13B 119.43(19) . . ? 
C11B C12B H12B 120.3 . . ? 
C13B C12B H12B 120.3 . . ? 
C12B C13B C8B 123.17(19) . . ? 
C12B C13B Cl3B 117.51(15) . . ? 
C8B C13B Cl3B 119.29(15) . . ? 
 
loop_ 
 _geom_torsion_atom_site_label_1 
 _geom_torsion_atom_site_label_2 
 _geom_torsion_atom_site_label_3 
 _geom_torsion_atom_site_label_4 
 _geom_torsion 
 _geom_torsion_site_symmetry_1 
 _geom_torsion_site_symmetry_2 
 _geom_torsion_site_symmetry_3 
 _geom_torsion_site_symmetry_4 
 _geom_torsion_publ_flag 
C4A S1A C1A C2A 0.7(2) . . . . ? 
C4A S1A C1A Cl1A -177.74(15) . . . . ? 
S1A C1A C2A C3A -0.9(3) . . . . ? 
Cl1A C1A C2A C3A 177.39(17) . . . . ? 
C1A C2A C3A C4A 0.7(3) . . . . ? 
C2A C3A C4A C5A 179.9(2) . . . . ? 
C2A C3A C4A S1A -0.2(3) . . . . ? 
C1A S1A C4A C3A -0.30(19) . . . . ? 
C1A S1A C4A C5A 179.60(19) . . . . ? 
C3A C4A C5A O1A -173.4(2) . . . . ? 
S1A C4A C5A O1A 6.7(3) . . . . ? 
C3A C4A C5A C6A 7.6(4) . . . . ? 
S1A C4A C5A C6A -172.27(17) . . . . ? 
O1A C5A C6A C7A -8.2(4) . . . . ? 
C4A C5A C6A C7A 170.8(2) . . . . ? 
C5A C6A C7A C8A -177.6(2) . . . . ? 
C6A C7A C8A C9A -43.5(4) . . . . ? 
C6A C7A C8A C13A 138.8(3) . . . . ? 
C13A C8A C9A C10A 0.8(3) . . . . ? 
C7A C8A C9A C10A -176.9(2) . . . . ? 
C13A C8A C9A Cl2A 178.97(17) . . . . ? 
C7A C8A C9A Cl2A 1.3(3) . . . . ? 
C8A C9A C10A C11A -0.1(4) . . . . ? 
Cl2A C9A C10A C11A -178.39(18) . . . . ? 
C9A C10A C11A C12A -0.5(4) . . . . ? 
C10A C11A C12A C13A 0.3(4) . . . . ? 
C11A C12A C13A C8A 0.4(4) . . . . ? 
C11A C12A C13A Cl3A -178.38(18) . . . . ? 
C9A C8A C13A C12A -0.9(3) . . . . ? 
C7A C8A C13A C12A 176.9(2) . . . . ? 
C9A C8A C13A Cl3A 177.85(17) . . . . ? 
C7A C8A C13A Cl3A -4.3(3) . . . . ? 
C4B S1B C1B C2B -0.2(2) . . . . ? 
C4B S1B C1B Cl1B 179.55(15) . . . . ? 
S1B C1B C2B C3B -0.1(3) . . . . ? 
Cl1B C1B C2B C3B -179.84(18) . . . . ? 
C1B C2B C3B C4B 0.5(3) . . . . ? 
C2B C3B C4B C5B 177.5(2) . . . . ? 
C2B C3B C4B S1B -0.6(3) . . . . ? 
C1B S1B C4B C3B 0.46(19) . . . . ? 
C1B S1B C4B C5B -177.93(18) . . . . ? 
C3B C4B C5B O1B -175.3(2) . . . . ? 
S1B C4B C5B O1B 2.7(3) . . . . ? 
C3B C4B C5B C6B 4.1(4) . . . . ? 
S1B C4B C5B C6B -177.88(16) . . . . ? 
O1B C5B C6B C7B 2.9(3) . . . . ? 
C4B C5B C6B C7B -176.5(2) . . . . ? 
C5B C6B C7B C8B -179.7(2) . . . . ? 
C6B C7B C8B C9B -32.7(4) . . . . ? 
C6B C7B C8B C13B 150.9(2) . . . . ? 
C13B C8B C9B C10B 1.7(3) . . . . ? 
C7B C8B C9B C10B -174.9(2) . . . . ? 
C13B C8B C9B Cl2B -179.61(17) . . . . ? 
C7B C8B C9B Cl2B 3.8(3) . . . . ? 
C8B C9B C10B C11B -1.2(4) . . . . ? 
Cl2B C9B C10B C11B -179.99(19) . . . . ? 
C9B C10B C11B C12B 0.2(4) . . . . ? 
C10B C11B C12B C13B 0.3(4) . . . . ? 
C11B C12B C13B C8B 0.3(4) . . . . ? 
C11B C12B C13B Cl3B -177.74(19) . . . . ? 
C9B C8B C13B C12B -1.2(3) . . . . ? 
C7B C8B C13B C12B 175.6(2) . . . . ? 
C9B C8B C13B Cl3B 176.77(17) . . . . ? 
C7B C8B C13B Cl3B -6.4(3) . . . . ? 
 
_diffrn_measured_fraction_theta_max    0.990 
_diffrn_reflns_theta_full              27.50 
_diffrn_measured_fraction_theta_full   0.990 
_refine_diff_density_max    0.366 
_refine_diff_density_min   -0.271 
_refine_diff_density_rms    0.078 


loop_
_geom_hbond_atom_site_label_D
_geom_hbond_atom_site_label_H
_geom_hbond_atom_site_label_A
_geom_hbond_distance_DH
_geom_hbond_distance_HA
_geom_hbond_distance_DA
_geom_hbond_angle_DHA
_geom_hbond_site_symmetry_A
_geom_hbond_publ_flag
#
#D   H   A   D - H  H...A   D...A    D - H...A  symm(A)
#
C2B     H2BA    O1A         0.9500     2.5000   3.209(3)     131.00   4_586 yes
#==========================================================================
#End of cif
